# Supplementary material for: Stereoselective synthesis of trifluoroethyl 3,2′-spirooxindole γ-lactam through the organocatalytic cascade reaction of 3-((2,2,2-trifluoroethyl)amino)indolin-2-one
Source: Royal Society of Chemistry journal article supplement (doi:10.1039/d0ob02166k), 2020-12-14
Supplement: d0ob02166k1.pdf [file d0ob02166k1.pdf]

# **Stereoselective synthesis of trifluoroethyl 3,2'- spriooxindole $\gamma$ -lactam through organocatalytic cascade reaction of 3-((2,2,2- trifluoroethyl)amino)indolin-2-one†**

Shuai-Jiang Liu, ‡<sup>a</sup> Qing Mao, ‡<sup>a</sup> Gu Zhan, \*<sup>a</sup> Rui Qin,<sup>a</sup> Ben-Hong Chen,<sup>a</sup>  
Jing Xue,<sup>a</sup> Meng-Lan Luo,<sup>a</sup> Qian Zhao\*<sup>a</sup> and Bo Han\*<sup>a</sup>

<sup>a</sup> School of Basic Medical Sciences, School of Pharmacy, State Key Laboratory of Southwestern Chinese Medicine Resources, Chengdu University of Traditional Chinese Medicine, Chengdu 611137, China. Email: zhangu@cdutcm.edu.cn; Email: zhaoq584@sina.cn; Email: hanbo@cdutcm.edu.cn

‡ These authors contributed equally.

## **Supporting information**

|                                                                             |    |
|-----------------------------------------------------------------------------|----|
| <b>1. X-Ray Diffraction Data for Compound 3l</b> .....                      | 2  |
| <b>2. General procedure for the synthesis of compound 1</b> .....           | 3  |
| <b>3. NMR of compound 1</b> .....                                           | 9  |
| <b>4. NMR and HPLC spectra of intermediate I (3k') and compound 3</b> ..... | 19 |

## 1. X-Ray Diffraction Data for Compound 3l

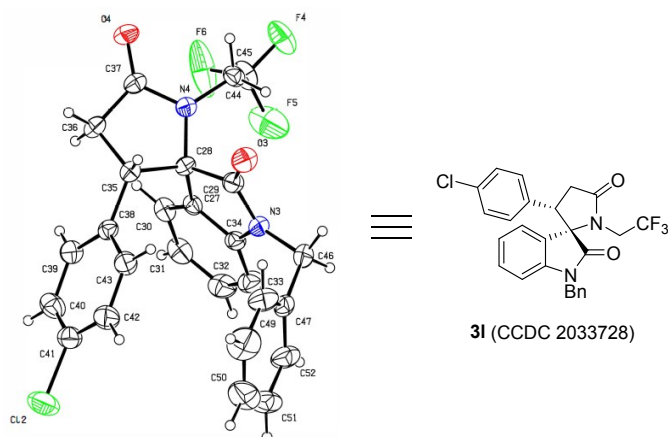

|                                             |                                                                                |
|---------------------------------------------|--------------------------------------------------------------------------------|
| Identification code                         | 3l                                                                             |
| Empirical formula                           | C <sub>26</sub> H <sub>20</sub> ClF <sub>3</sub> N <sub>2</sub> O <sub>2</sub> |
| Formula weight                              | 484.89                                                                         |
| Temperature/K                               | 293(2)                                                                         |
| Crystal system                              | monoclinic                                                                     |
| Space group                                 | P2 <sub>1</sub>                                                                |
| a/Å                                         | 8.1617(4)                                                                      |
| b/Å                                         | 24.6313(11)                                                                    |
| c/Å                                         | 11.5178(7)                                                                     |
| α/°                                         | 90                                                                             |
| β/°                                         | 91.993(5)                                                                      |
| γ/°                                         | 90                                                                             |
| Volume/Å <sup>3</sup>                       | 2314.1(2)                                                                      |
| Z                                           | 4                                                                              |
| ρ <sub>calc</sub> /cm <sup>3</sup>          | 1.392                                                                          |
| μ/mm <sup>-1</sup>                          | 0.216                                                                          |
| F(000)                                      | 1000.0                                                                         |
| Crystal size/mm <sup>3</sup>                | ? × ? × ?                                                                      |
| Radiation                                   | MoKα (λ = 0.71073)                                                             |
| 2θ range for data collection/°              | 5.99 to 58.82                                                                  |
| Index ranges                                | -6 ≤ h ≤ 11, -19 ≤ k ≤ 31, -15 ≤ l ≤ 14                                        |
| Reflections collected                       | 10939                                                                          |
| Independent reflections                     | 7552 [R <sub>int</sub> = 0.0171, R <sub>sigma</sub> = 0.0438]                  |
| Data/restraints/parameters                  | 7552/1/613                                                                     |
| Goodness-of-fit on F <sup>2</sup>           | 1.026                                                                          |
| Final R indexes [I ≥ 2σ (I)]                | R <sub>1</sub> = 0.0505, wR <sub>2</sub> = 0.1091                              |
| Final R indexes [all data]                  | R <sub>1</sub> = 0.0763, wR <sub>2</sub> = 0.1220                              |
| Largest diff. peak/hole / e Å <sup>-3</sup> | 0.18/-0.29                                                                     |
| Flack parameter                             | 0.01(4)                                                                        |

## 2. General procedure for the synthesis of 3-((2,2,2-trifluoroethyl)amino)indoles 1

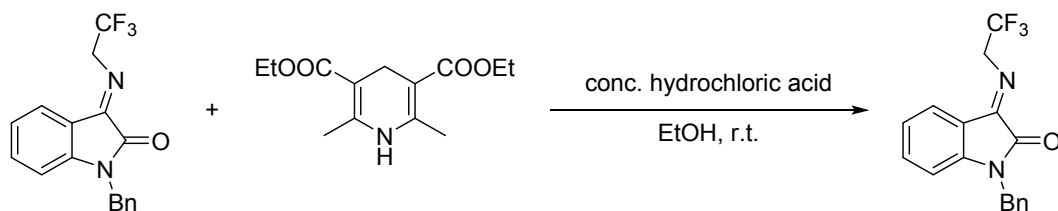

The reaction was carried out with *N*-2, 2, 2 trifluoroethyl isatin ketamines (5.0 mmol), Hantzsch ester (1.27 g, 5.0 mmol) in the presence of conc. hydrochloric acid (0.1 mL) in EtOH (35 ml) at room temperature. The reaction was monitored by TLC. The mixture was purified by flash chromatography (silica gel, hexane/ethyl acetate) to give the products **1**.

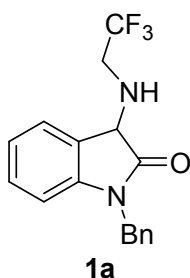

**1-benzyl-3-((2,2,2-trifluoroethyl)amino)indolin-2-one (1a)**. White solid, 1.42 g, 89% yield, m.p. 124–126 °C. <sup>1</sup>H NMR (600 MHz, CDCl<sub>3</sub>): δ = 7.43 (d, *J* = 7.2 Hz, 1H), 7.35–7.27 (m, 5H), 7.23 (t, *J* = 7.8 Hz, 1H), 7.08 (td, *J* = 7.2, 0.6 Hz, 1H), 6.74 (d, *J* = 8.4 Hz, 1H), 4.92 (d, *J* = 15.6 Hz, 1H), 4.84 (d, *J* = 15.6 Hz, 1H), 4.50 (s, 1H), 3.41–3.34 (m, 1H), 3.08–3.00 (m, 1H), 2.36 (s, 1H) ppm; <sup>13</sup>C NMR (150 MHz, CDCl<sub>3</sub>): δ = 176.4, 143.4, 135.5, 129.5, 128.9, 127.8, 127.3, 125.1 (d, *J* = 274.5 Hz), 125.3, 125.2, 123.2, 109.4, 77.3, 77.0, 76.8, 59.3, 46.3 (q, *J* = 33.0 Hz), 43.9 ppm. ESI HRMS: calcd for C<sub>17</sub>H<sub>15</sub>F<sub>3</sub>N<sub>2</sub>O + Na<sup>+</sup> 343.1029, found 343.1034.

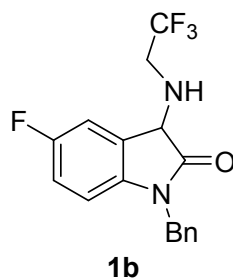

**1-benzyl-5-fluoro-3-((2,2,2-trifluoroethyl)amino)indolin-2-one (1b).** White solid, 1.44 g, 85% yield, m.p. 130–132 °C. <sup>1</sup>H NMR (600 MHz, CDCl<sub>3</sub>): δ = 7.34–7.27 (m, 5H), 7.20–7.18 (m, 1H), 6.94 – 6.90 (m, 1H), 6.64 (dd, *J* = 8.6, 4.2 Hz, 1H), 4.91 (d, *J* = 15.6 Hz, 1H), 4.83 (d, *J* = 15.6 Hz, 1H), 4.49 (s, 1H), 3.43–3.36 (m, 1H), 3.07–3.00 (m, 1H), 2.33 (s, 1H) ppm; <sup>13</sup>C NMR (150 MHz, CDCl<sub>3</sub>): δ = 176.1, 159.5 (d, *J* = 240.0 Hz), 139.2, 135.2, 129.0, 128.0, 127.3, 127.1 (d, *J* = 9.0 Hz), 124.9, 115.9 (d, *J* = 24.0 Hz), 113.4 (d, *J* = 25.5 Hz), 110.1 (d, *J* = 7.5 Hz), 59.6, 45.5 (q, *J* = 31.5 Hz), 44.0 ppm. ESI HRMS: calcd for C<sub>17</sub>H<sub>14</sub>F<sub>4</sub>N<sub>2</sub>O + Na<sup>+</sup> 361.0934, found 361.0944.

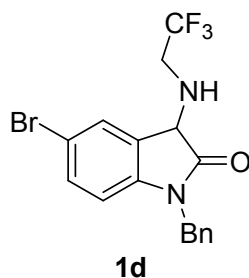

**1-benzyl-5-bromo-3-((2,2,2-trifluoroethyl)amino)indolin-2-one (1d).** White solid, 1.79 g, 89% yield, m.p. 166–168 °C. <sup>1</sup>H NMR (600 MHz, *d*<sub>6</sub>-DMSO): δ = 7.47 (d, *J* = 1.2 Hz, 1H), 7.43–7.41 (m, 1H), 7.33–7.32 (m, 4H), 7.29–7.25 (m, 1H), 6.81 (d, *J* = 8.4 Hz, 1H), 4.88 (d, *J* = 15.6 Hz, 1H), 4.83 (d, *J* = 15.6 Hz, 1H), 4.61 (d, *J* = 7.8 Hz, 1H), 3.74–3.70 (m, 1H), 3.52–3.45 (m, 1H), 3.41–3.37 (m, 1H) ppm; <sup>13</sup>C NMR (150 MHz, *d*<sub>6</sub>-DMSO): δ = 176.35, 142.68, 136.45, 131.77, 130.32, 129.08, 127.90, 127.81, 127.69, 126.17 (d, *J* = 275 Hz), 114.61, 111.50, 59.46, 47.20 (q, *J* = 30.0 Hz), 43.09 ppm. ESI HRMS: calcd for C<sub>17</sub>H<sub>14</sub>BrF<sub>3</sub>N<sub>2</sub>O + Na<sup>+</sup> 421.0134, found 421.0134.

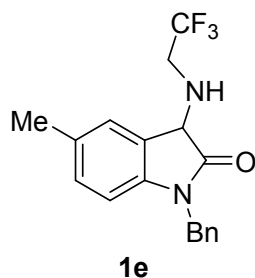

**1-benzyl-5-methyl-3-((2,2,2-trifluoroethyl)amino)indolin-2-one (1e).** White solid, 1.47 g, 88% yield, m.p. 145–147 °C. <sup>1</sup>H NMR (600 MHz, CDCl<sub>3</sub>): δ = 7.35–7.27 (m, 5H), 7.25 (s, 1H), 7.03–7.01 (m, 1H), 6.62 (d, *J* = 7.8 Hz, 1H), 4.90 (d, *J* = 15.6 Hz, 1H), 4.83 (d, 15.6 Hz, 1H), 4.46 (s, 1H), 3.41–3.34 (m, 1H), 3.10–3.03 (m, 1H), 2.31 (s, 3H), 1.67 (s, 1H) ppm; <sup>13</sup>C NMR (150 MHz, CDCl<sub>3</sub>): δ = 176.3, 140.9, 135.6, 132.9, 129.7, 128.9, 126.9 (d, *J* = 267.0 Hz), 127.3, 125.3, 124.2, 109.2, 59.4, 46.4 (q, *J* = 31.5 Hz), 43.9, 21.0 ppm. ESI HRMS: calcd for C<sub>18</sub>H<sub>17</sub>F<sub>3</sub>N<sub>2</sub>O + Na<sup>+</sup> 357.1185, found 357.1193.

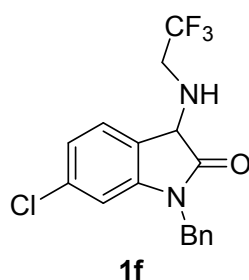

**1-benzyl-6-chloro-3-((2,2,2-trifluoroethyl)amino)indolin-2-one (1f).** White solid, 1.42 g, 80% yield, m.p. 140–142 °C. <sup>1</sup>H NMR (600 MHz, CDCl<sub>3</sub>): δ = 7.36–7.33 (m, 3H), 7.30–7.26 (m, 3H), 7.06 (dd, *J* = 7.8, 1.8 Hz, 1H), 6.73 (d, *J* = 1.8 Hz, 1H), 4.89 (d, *J* = 15.6 Hz, 1H), 4.81 (d, *J* = 15.6 Hz, 1H), 4.46 (s, 1H), 3.41–3.34 (m, 1H), 3.06–3.00 (m, 1H), 2.33 (s, 1H) ppm; <sup>13</sup>C NMR (150 MHz, CDCl<sub>3</sub>): δ = 176.37, 144.52, 135.35, 134.98, 129.04, 128.07, 127.30, 126.21, 124.94 (d, *J* = 274.5 Hz), 123.65, 123.13, 110.02, 58.95, 46.33 (q, *J* = 33.0 Hz), 43.99 ppm. ESI HRMS: calcd for C<sub>17</sub>H<sub>14</sub>ClF<sub>3</sub>N<sub>2</sub>O + Na<sup>+</sup> 377.0639, found 377.0645.

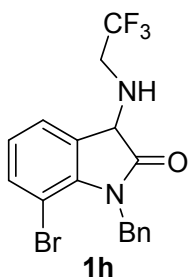

**1-benzyl-7-bromo-3-((2,2,2-trifluoroethyl)amino)indolin-2-one (1h).** White solid, 1.58 g, 79% yield, m.p. 112–114 °C. <sup>1</sup>H NMR (600 MHz, CDCl<sub>3</sub>): δ = 7.42–7.40 (m, 2H), 7.33–7.26 (m, 3H), 7.25–7.20 (m, 3H), 6.97 (dd, *J* = 7.8, 7.2 Hz, 1H), 5.38 (s, 2H), 4.48 (s, 1H), 3.40–3.33 (m, 1H), 3.07–3.00 (m, 1H) ppm; <sup>13</sup>C NMR (150 MHz, CDCl<sub>3</sub>): δ = 177.2, 140.8, 137.1, 135.5, 128.7, 128.6, 127.3, 126.4, 125.0 (d, *J* = 274.5 Hz), 124.5, 124.4, 124.0, 102.8, 58.8, 46.4 (q, *J* = 33.0 Hz), 44.6 ppm. ESI HRMS: calcd for C<sub>17</sub>H<sub>14</sub>BrF<sub>3</sub>N<sub>2</sub>O + Na<sup>+</sup> 421.0134, found 421.0134.

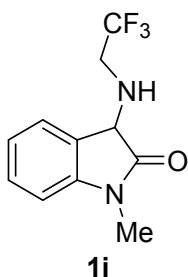

**1-methyl-3-((2,2,2-trifluoroethyl)amino)indolin-2-one (1i).** White solid, 1.00 g, 82% yield, m.p. 80–82 °C. <sup>1</sup>H NMR (600 MHz, CDCl<sub>3</sub>): δ = 7.43 (d, *J* = 7.2 Hz, 1H), 7.36–7.33 (m, 1H), 7.12 (td, *J* = 7.2, 0.6 Hz, 1H), 6.84 (d, *J* = 7.8 Hz, 1H), 4.40 (s, 1H), 3.37–3.30 (m, 1H), 3.20 (s, 3H), 3.06–3.00 (m, 1H), 2.18 (s, 1H) ppm; <sup>13</sup>C NMR (150 MHz, CDCl<sub>3</sub>): δ = 176.3, 144.3, 129.6, 126.0 (d, *J* = 276.0 Hz), 125.3, 125.1, 123.1, 108.4, 59.3, 46.4 (q, *J* = 31.5 Hz), 26.2 ppm. ESI HRMS: calcd for C<sub>11</sub>H<sub>11</sub>F<sub>3</sub>N<sub>2</sub>O + Na<sup>+</sup> 267.0716, found 267.0727.

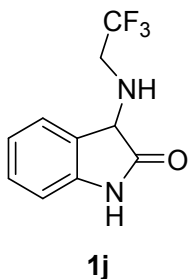

**3-((2,2,2-trifluoroethyl)amino)indolin-2-one (1j).** White solid, 0.98 g, 85% yield,

m.p. 118–120 °C.  $^1\text{H}$  NMR (600 MHz,  $d_6$ -DMSO):  $\delta$  = 10.33 (s, 1H), 7.29 (d,  $J$  = 7.2 Hz, 1H), 7.22–7.19 (m, 1H), 6.97 (td,  $J$  = 7.8, 0.6 Hz, 1H), 6.80 (d,  $J$  = 7.2 Hz, 1H), 4.31 (d,  $J$  = 6.0 Hz, 1H), 3.49–3.46 (m, 1H), 3.44–3.39 (m, 1H), 3.29–3.22 (m, 1H) ppm;  $^{13}\text{C}$  NMR (150 MHz,  $d_6$ -DMSO):  $\delta$  = 178.50, 142.96, 129.17, 128.14, 126.22 (d,  $J$  = 276.0 Hz), 125.23, 121.96, 109.94, 59.73, 46.93 (q,  $J$  = 30.0 Hz) ppm. ESI HRMS: calcd for  $\text{C}_{10}\text{H}_{19}\text{F}_3\text{N}_2\text{O} + \text{Na}^+$  253.0559, found 253.0564.

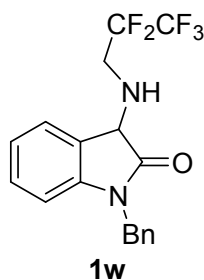

**1-benzyl-3-((2,2,3,3,3-pentafluoropropyl)amino)indolin-2-one (1w).** White solid, 1.52 g, 82% yield, m.p. 49–51 °C.  $^1\text{H}$  NMR (600 MHz,  $\text{CDCl}_3$ ):  $\delta$  = 7.41 (d,  $J$  = 7.2 Hz, 1H), 7.34–7.28 (m, 5H), 7.23 (t,  $J$  = 7.8 Hz, 1H), 7.08 (t,  $J$  = 7.8 Hz, 1H), 6.75 (d,  $J$  = 7.8 Hz, 1H), 4.94 (d,  $J$  = 15.6 Hz, 1H), 4.84 (d,  $J$  = 15.6 Hz, 1H), 4.50 (s, 1H), 3.41 (q,  $J$  = 13.8 Hz, 1H), 3.09 (m, 1H), 2.28 (s, 1H) ppm;  $^{13}\text{C}$  NMR (150 MHz,  $\text{CDCl}_3$ ):  $\delta$  = 176.4, 143.4, 135.5, 129.6, 128.9, 127.9, 127.3, 125.2, 125.2, 123.2, 119.9 (t,  $J$  = 3.6 Hz), 118.0 (t,  $J$  = 3.6 Hz), 115.7 (d,  $J$  = 3.6 Hz), 114.0 (d,  $J$  = 3.6 Hz), 109.4, 59.5, 44.5 (t,  $J$  = 2.4 Hz), 43.9 ppm. ESI HRMS: calcd for  $\text{C}_{18}\text{H}_{15}\text{F}_5\text{N}_2\text{O} + \text{Na}^+$  393.0997, found 393.0995.

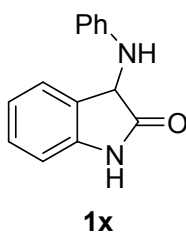

**3-(phenylamino)indolin-2-one (1x).** Pale yellow solid, 0.89 g, 79% yield, m.p. 150–152 °C.  $^1\text{H}$  NMR (600 MHz,  $d_6$ -DMSO):  $\delta$  = 10.51 (s, 1H), 7.22 (t,  $J$  = 7.2 Hz, 1H), 7.18 (d,  $J$  = 7.2 Hz, 1H), 7.02–6.99 (m, 2H), 6.94 (t,  $J$  = 7.2 Hz, 1H), 6.87 (d,  $J$  = 7.8 Hz, 1H), 6.53 (t,  $J$  = 7.2 Hz, 1H), 6.48 (m, 3H), 5.07 (d,  $J$  = 8.4 Hz, 1H) ppm;  $^{13}\text{C}$  NMR (150 MHz,  $d_6$ -DMSO):  $\delta$  = 177.52, 147.97, 142.42, 129.23, 129.03, 128.66, 124.54, 122.05, 116.83, 113.14, 110.14, 56.34 ppm. ESI HRMS: calcd for  $\text{C}_{14}\text{H}_{12}\text{N}_2\text{O} + \text{Na}^+$

247.0842, found 247.0839.



### 3. NMR of compound 1

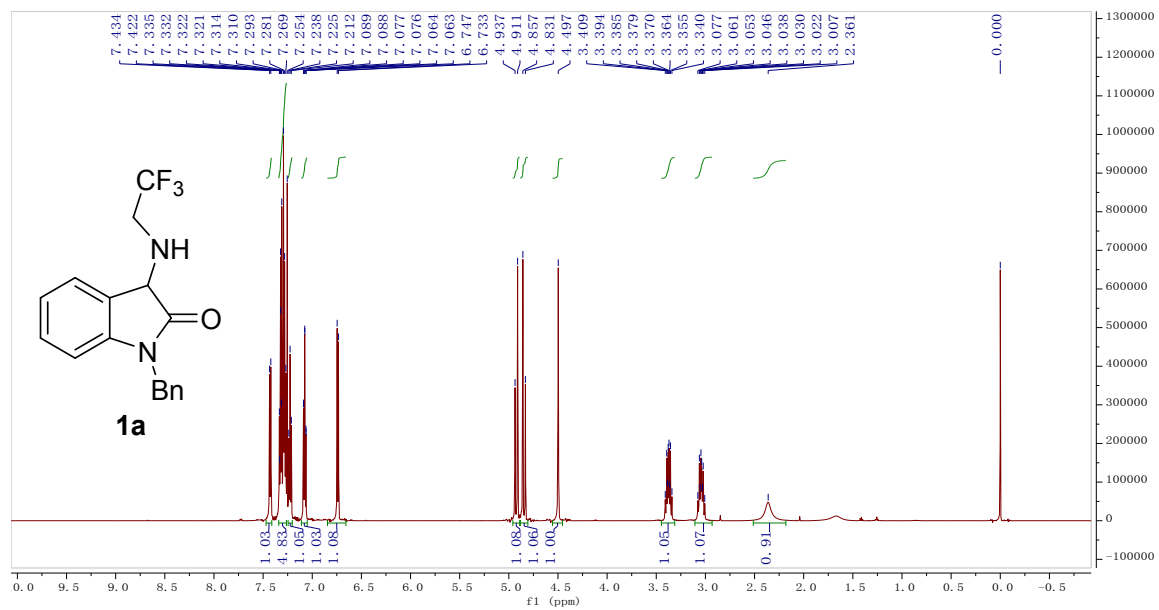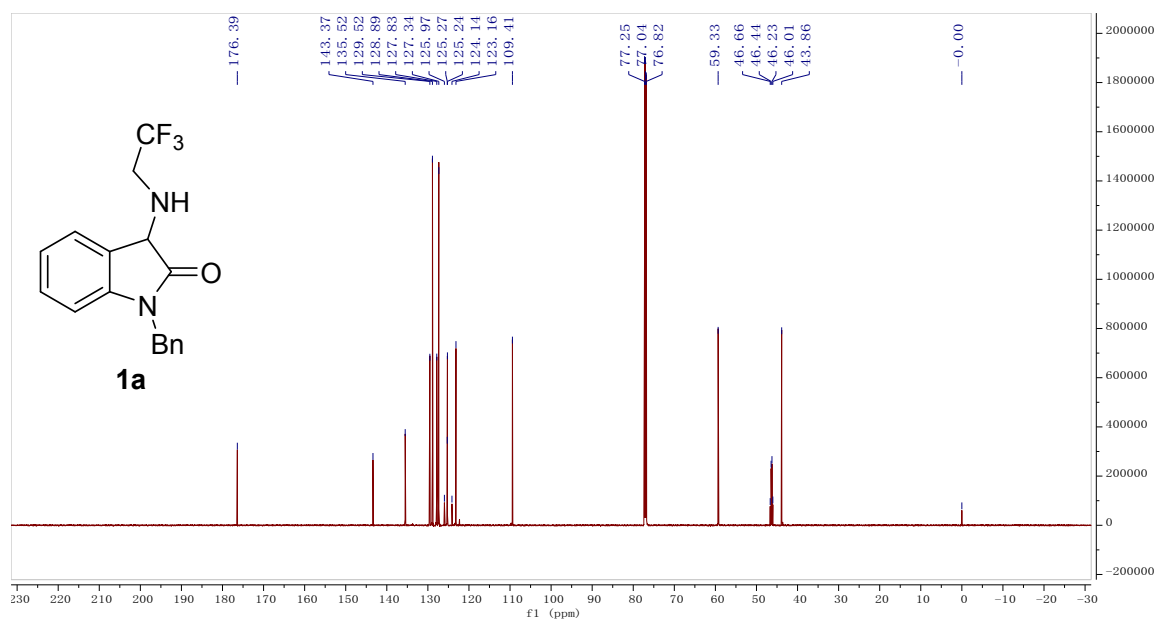

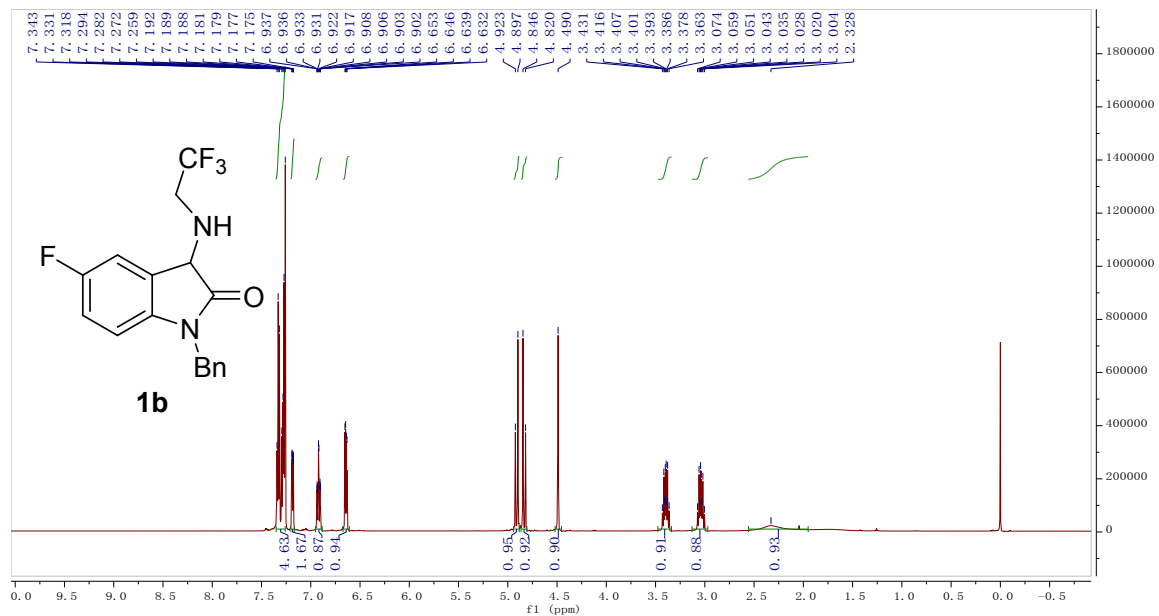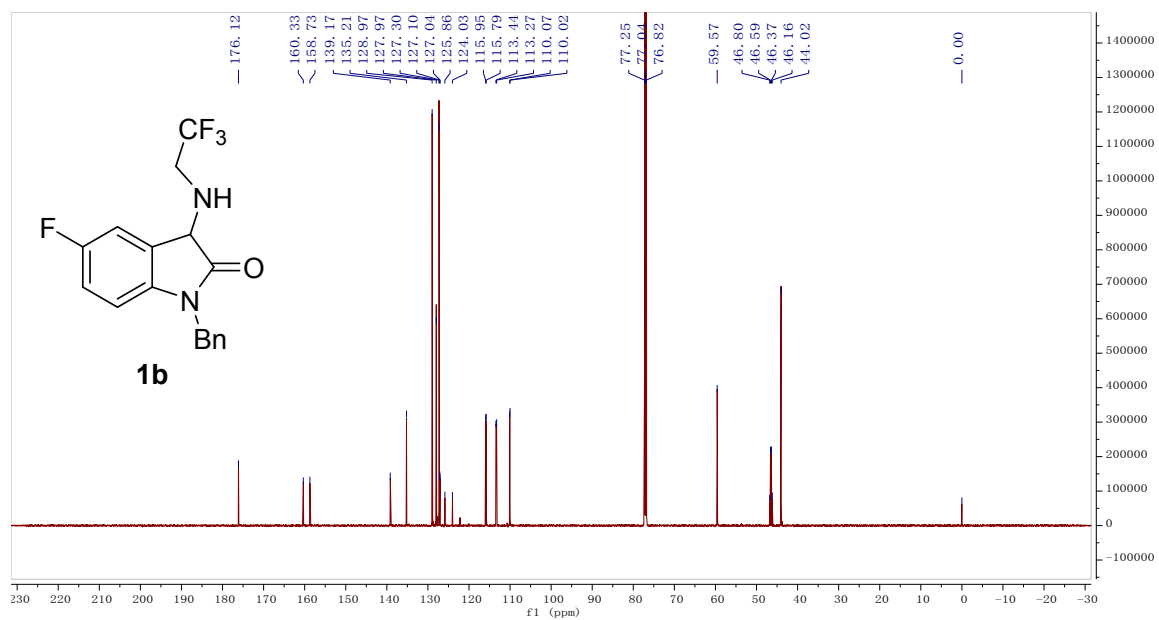

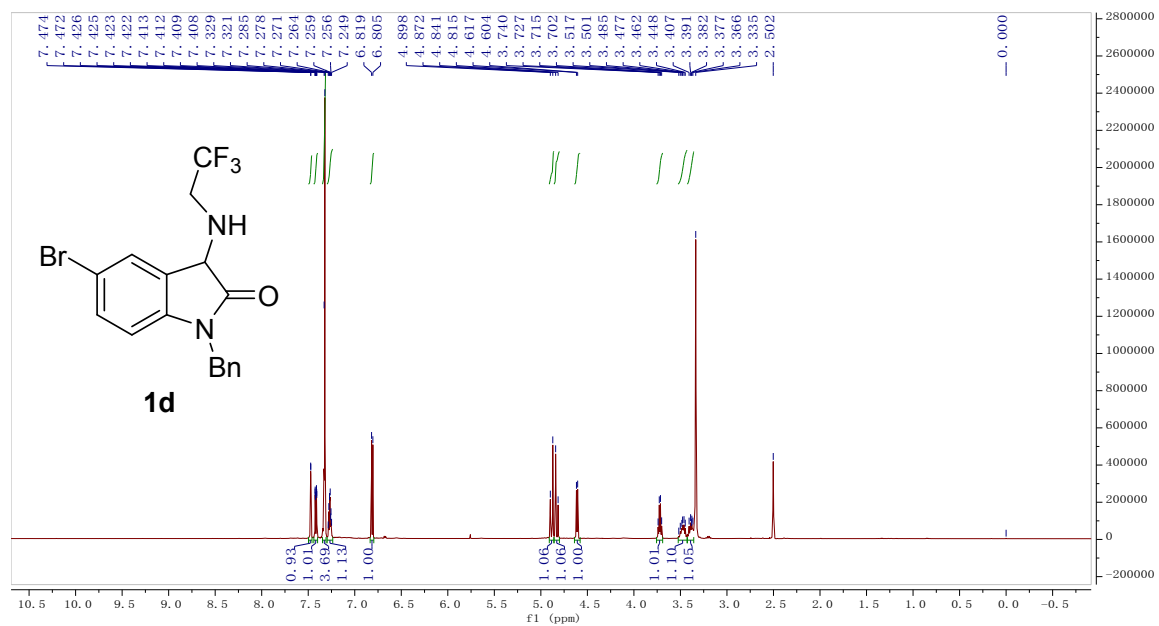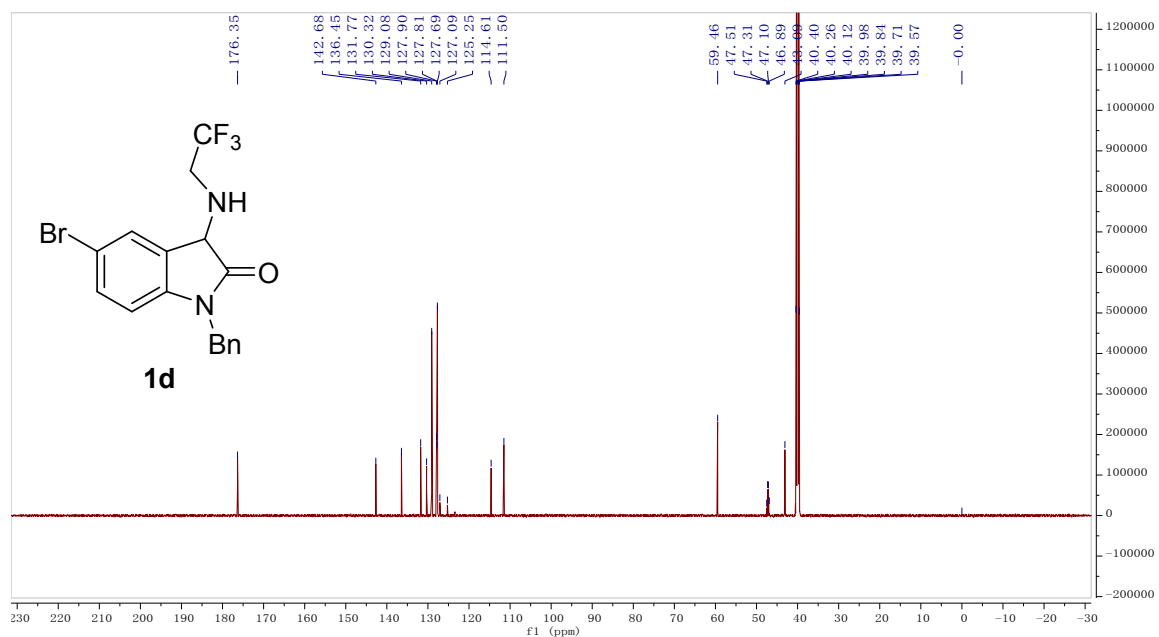

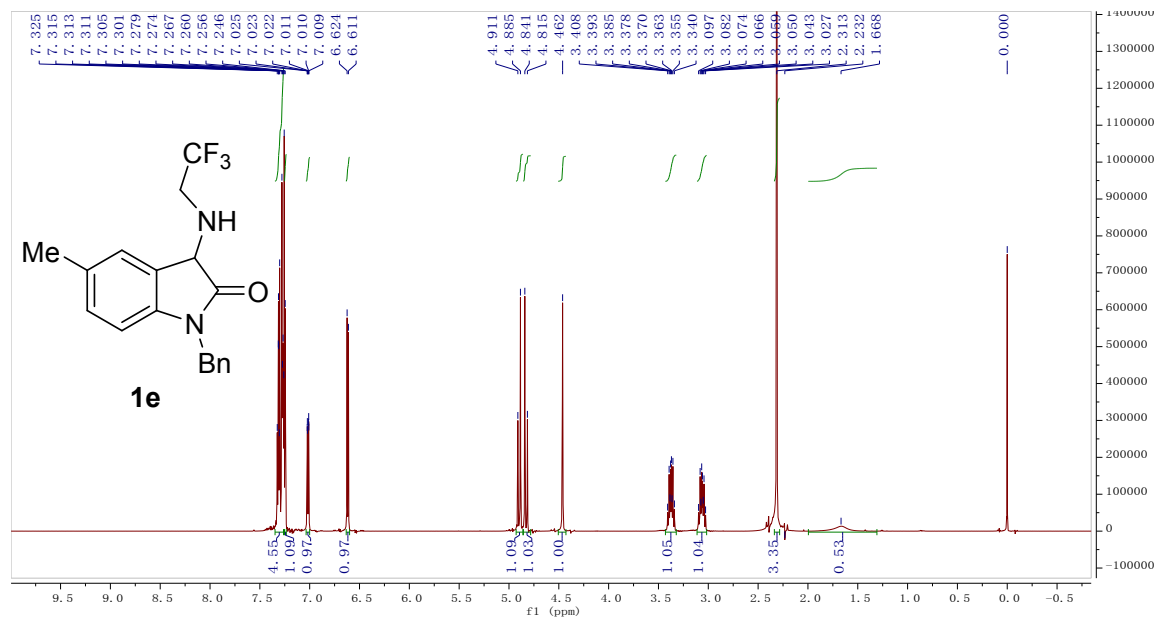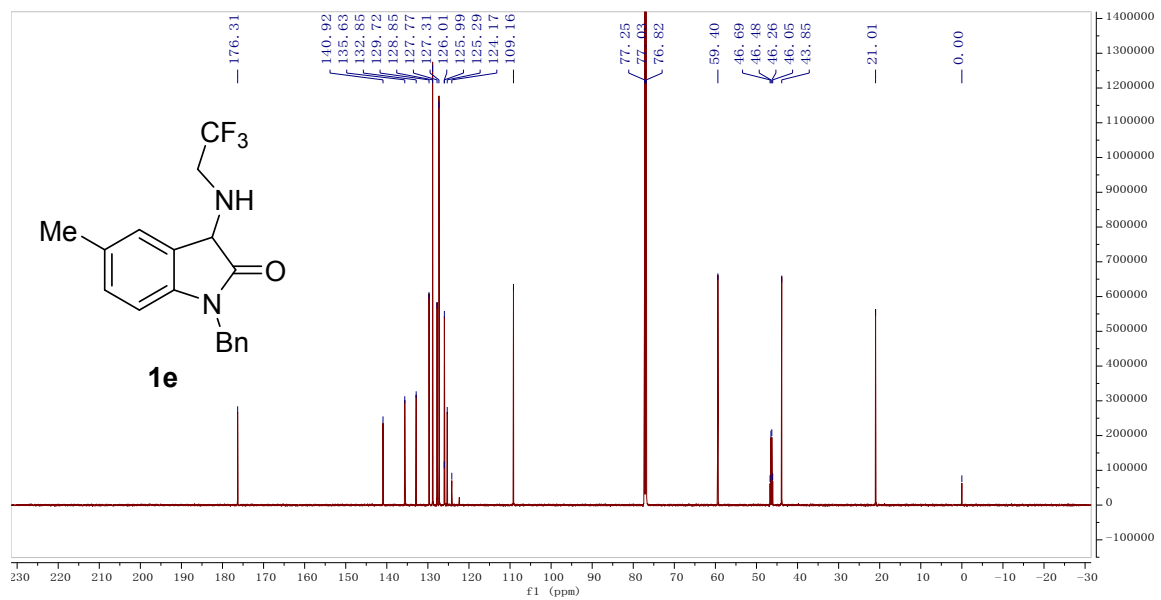

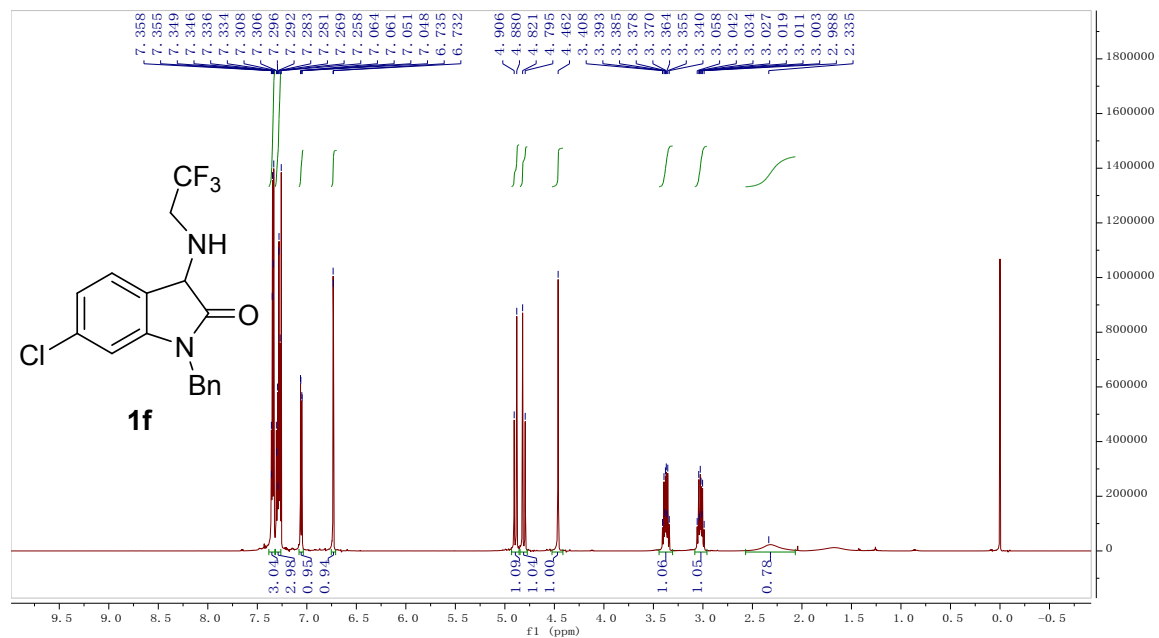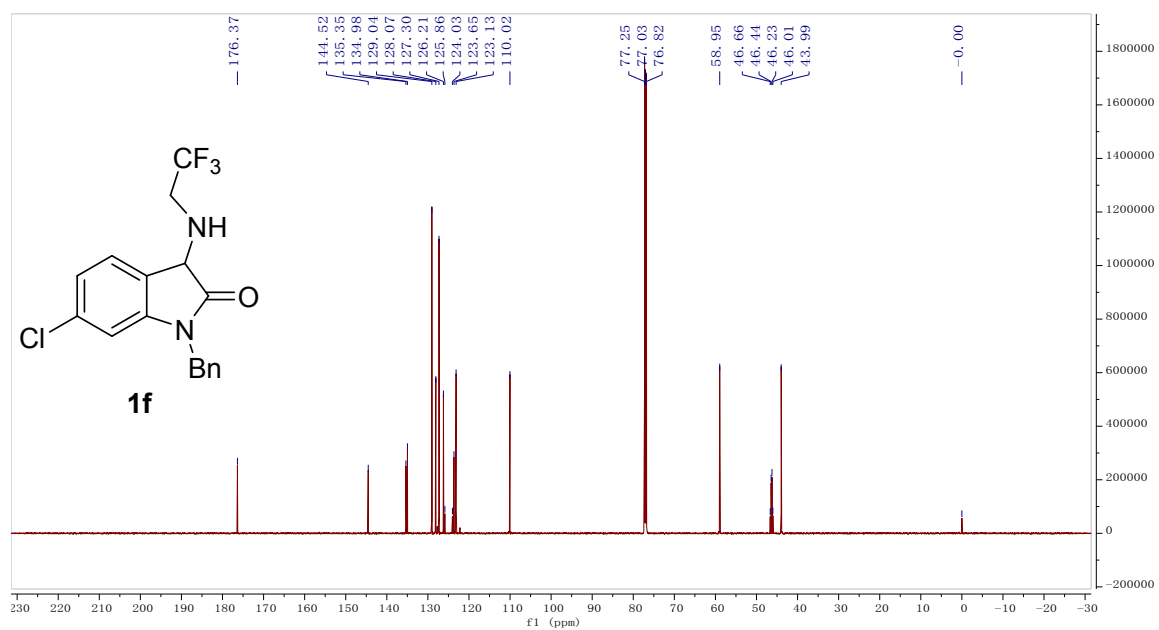

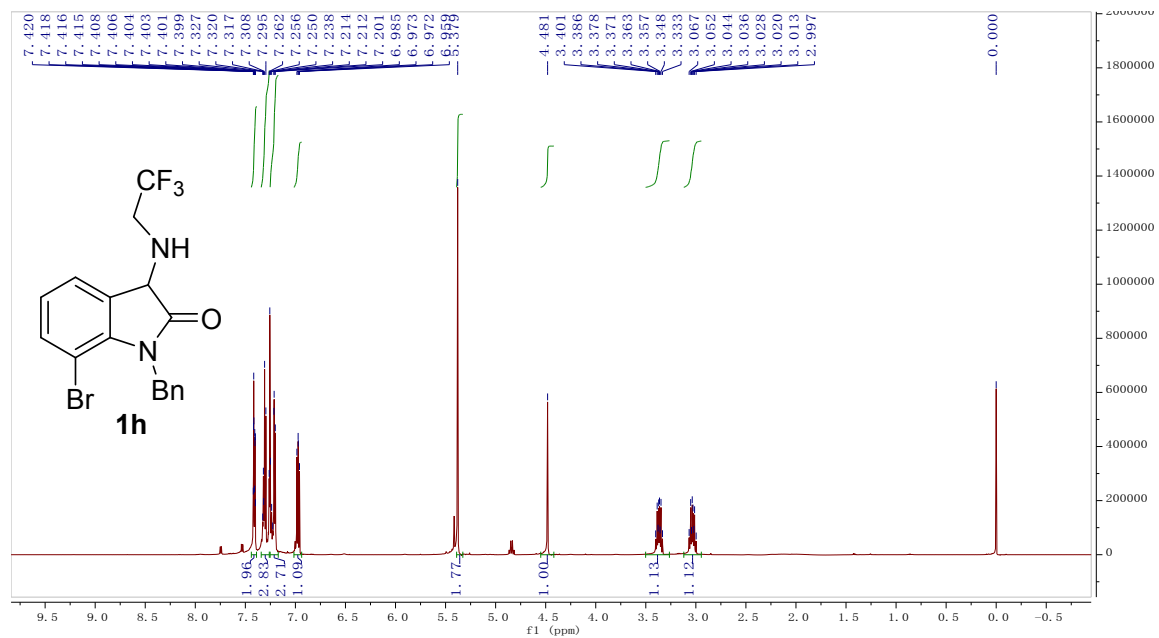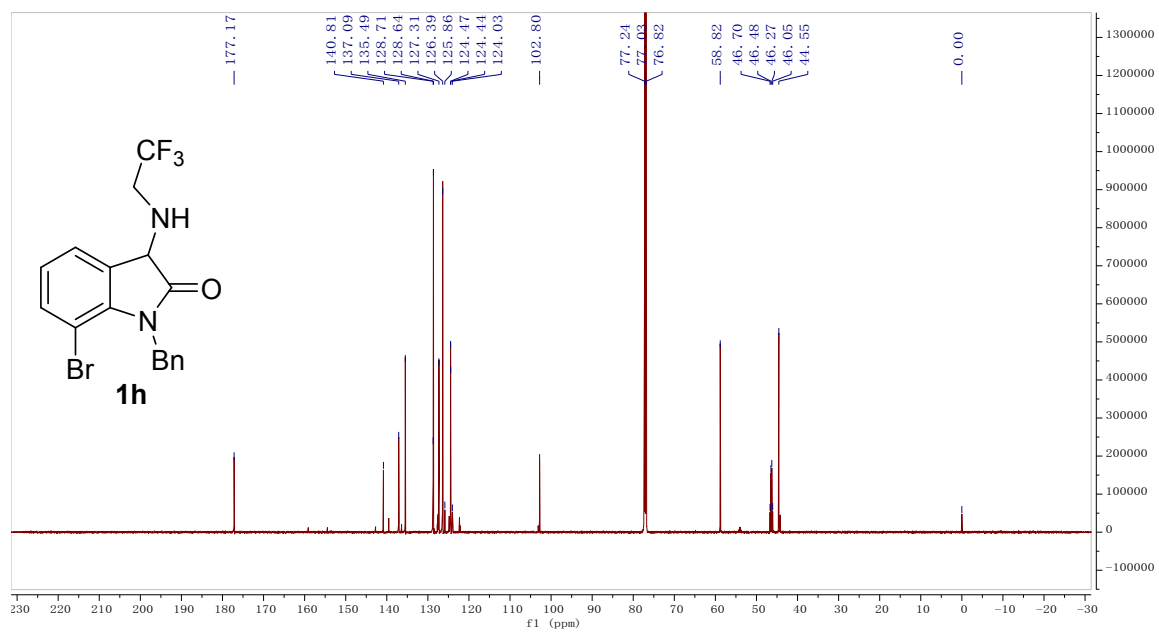

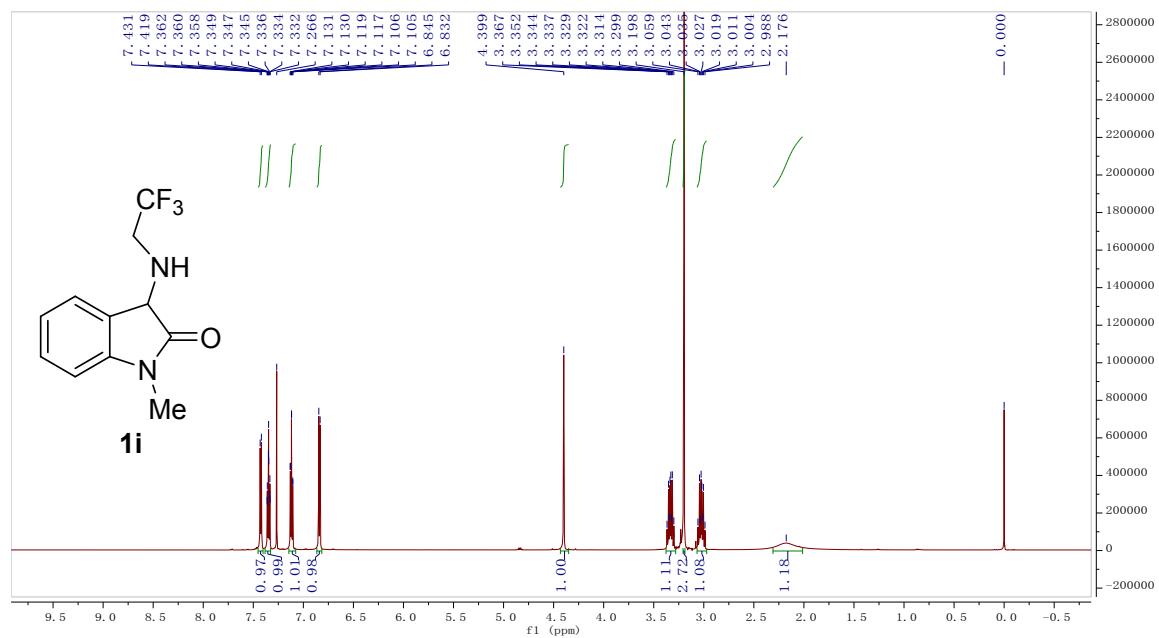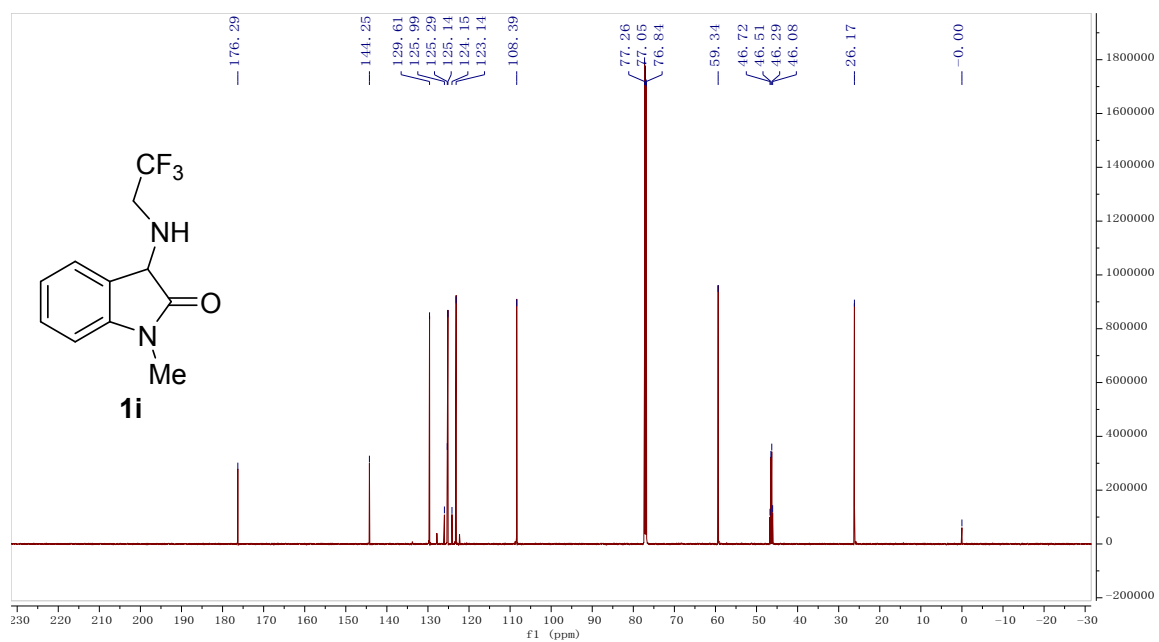

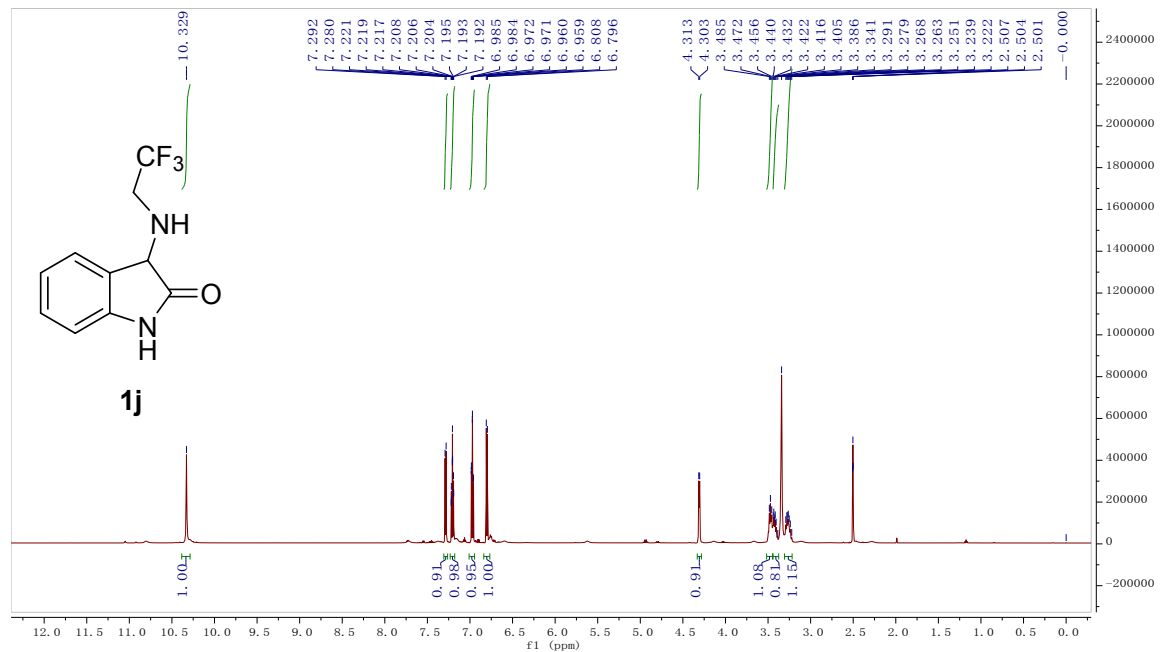



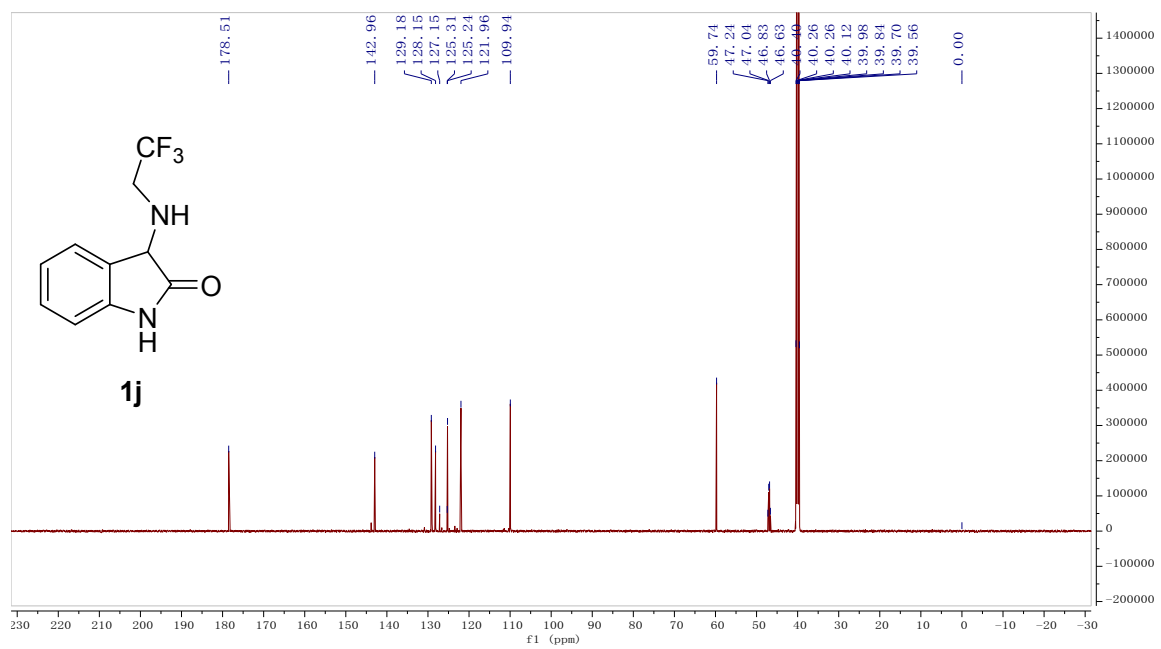

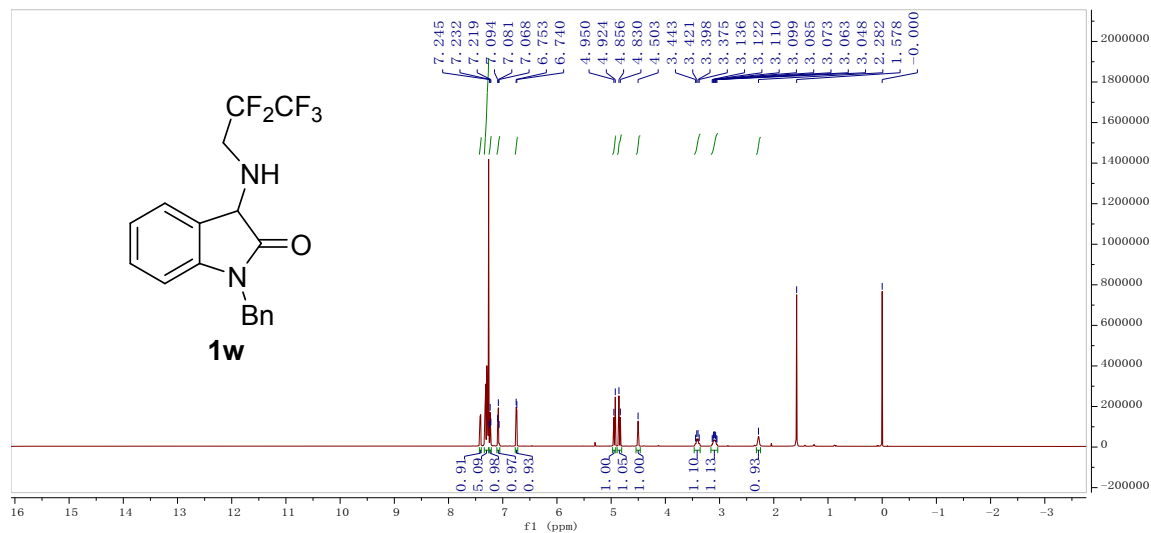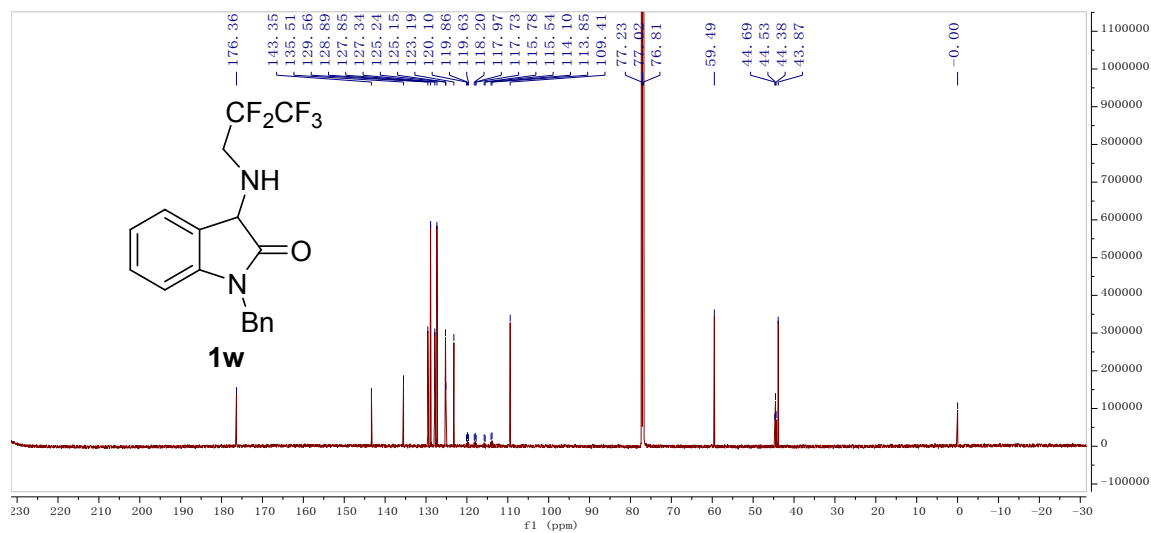

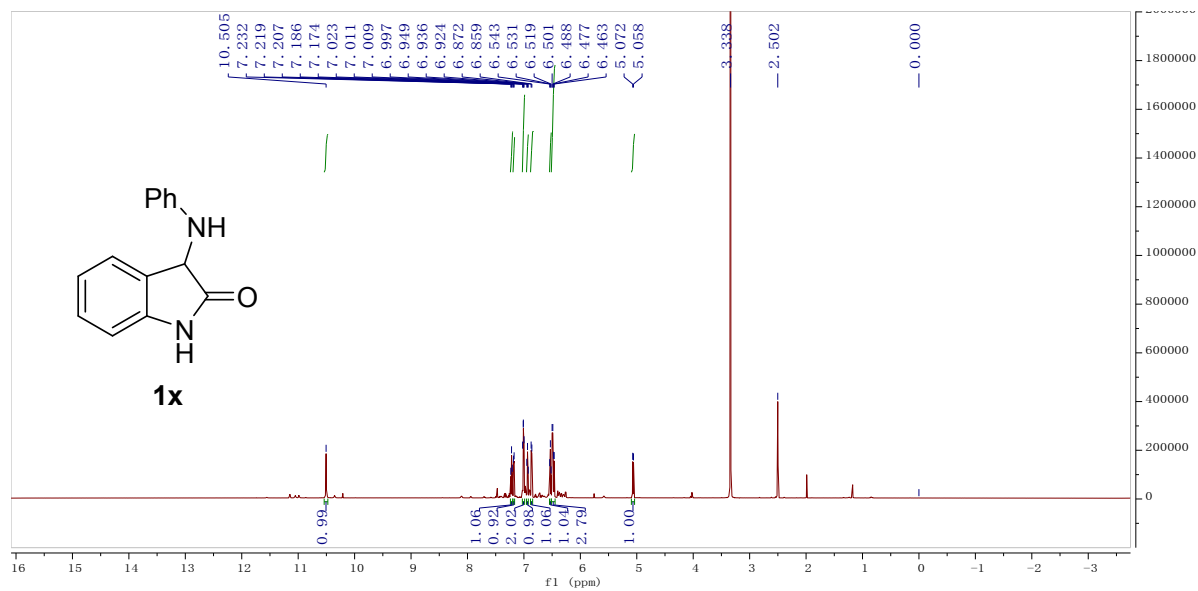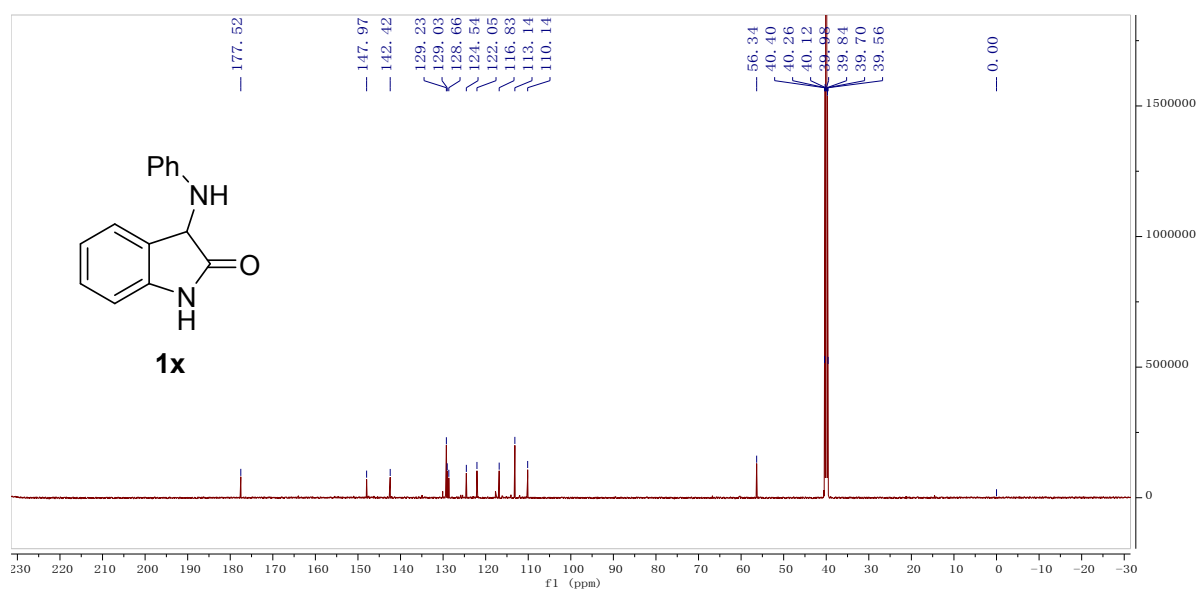

## 4. NMR and HPLC spectra of intermediate I (3k') and compound 3

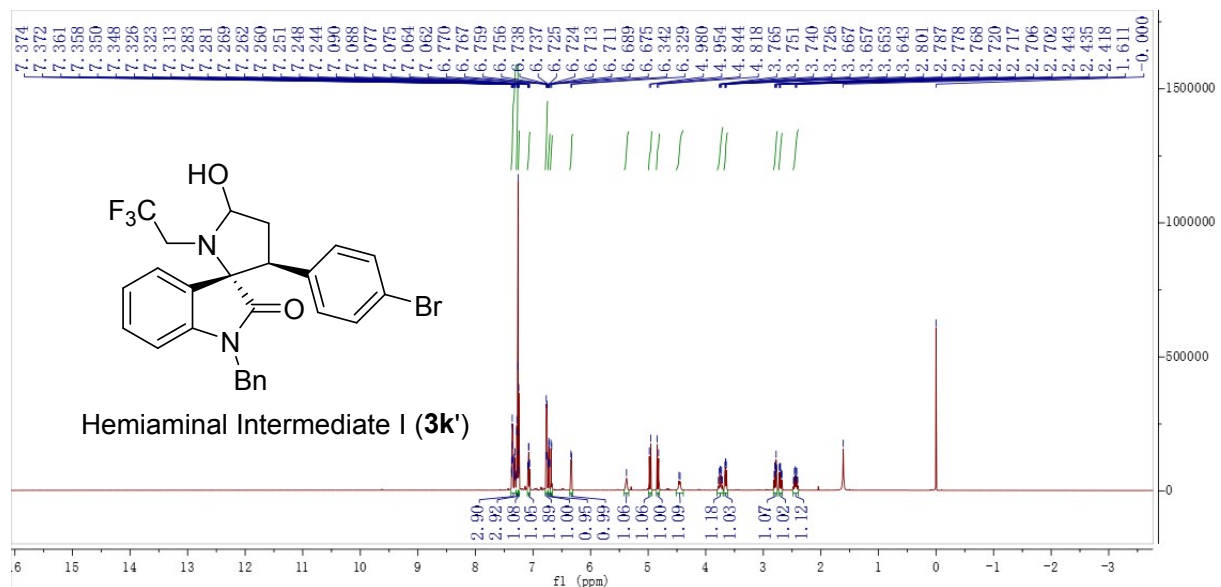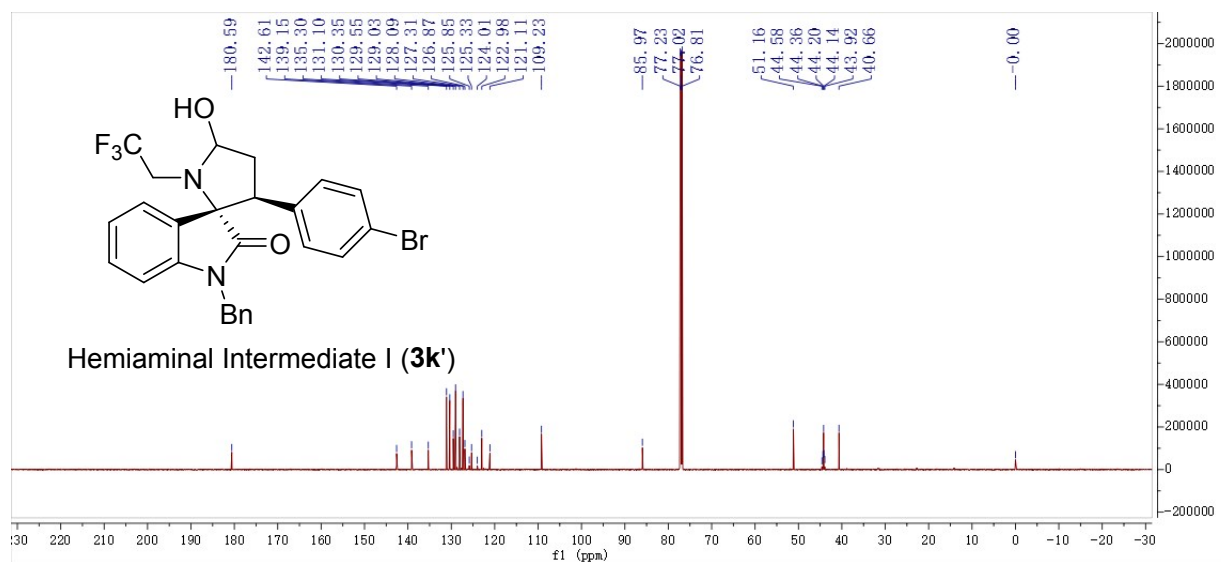

### <Chromatogram>

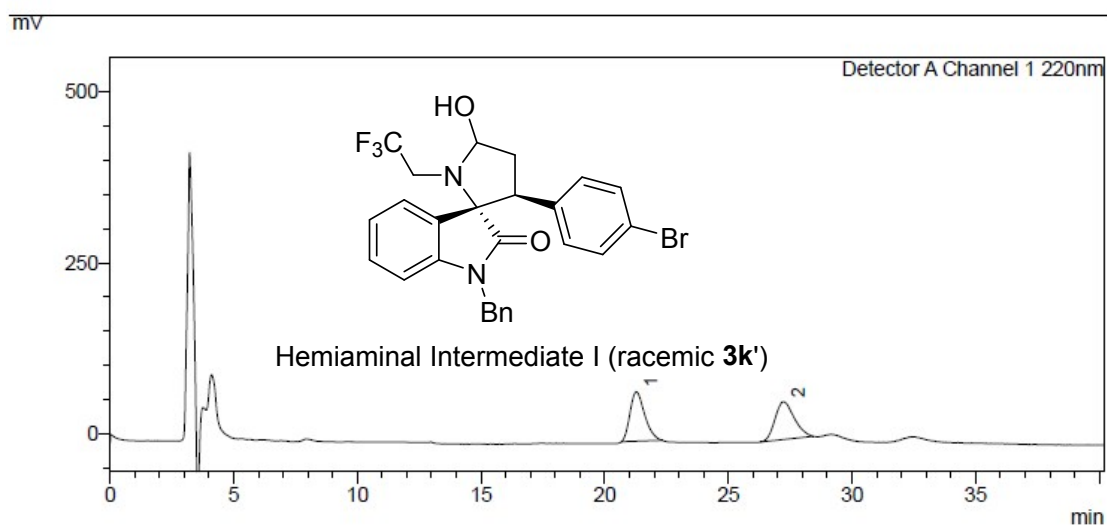

### <Peak Table>

Detector A Channel 1 220nm

| Peak# | Ret. Time | Area    | Height | Conc.  | Area%   |
|-------|-----------|---------|--------|--------|---------|
| 1     | 21.277    | 2970276 | 72321  | 50.097 | 50.097  |
| 2     | 27.233    | 2958732 | 54948  | 49.903 | 49.903  |
| Total |           | 5929008 | 127269 |        | 100.000 |

### <Chromatogram>

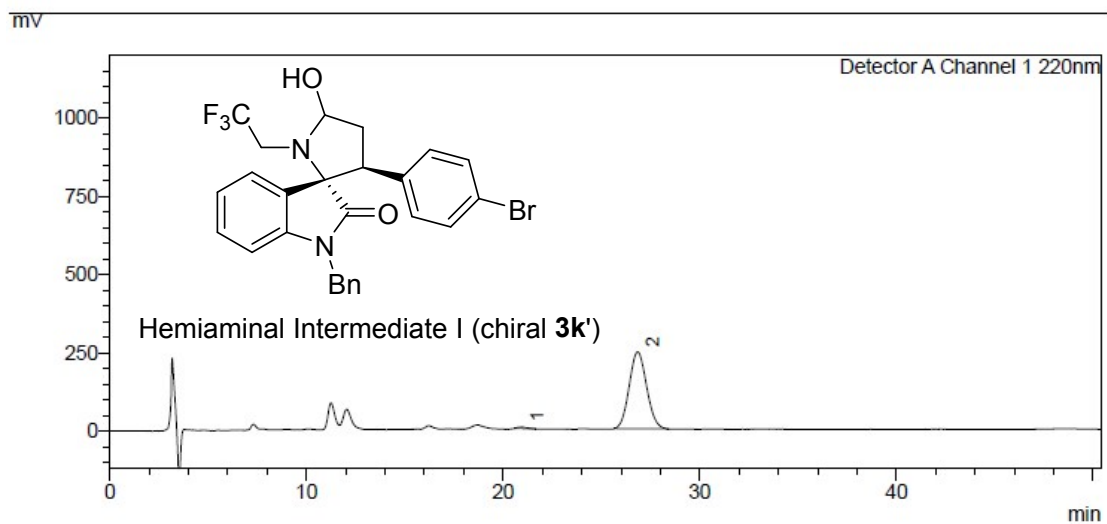

### <Peak Table>

Detector A Channel 1 220nm

| Peak# | Ret. Time | Area     | Height | Conc.  | Area%   |
|-------|-----------|----------|--------|--------|---------|
| 1     | 21.493    | 143409   | 4787   | 0.809  | 0.809   |
| 2     | 27.305    | 17573388 | 227824 | 99.191 | 99.191  |
| Total |           | 17716797 | 232611 |        | 100.000 |

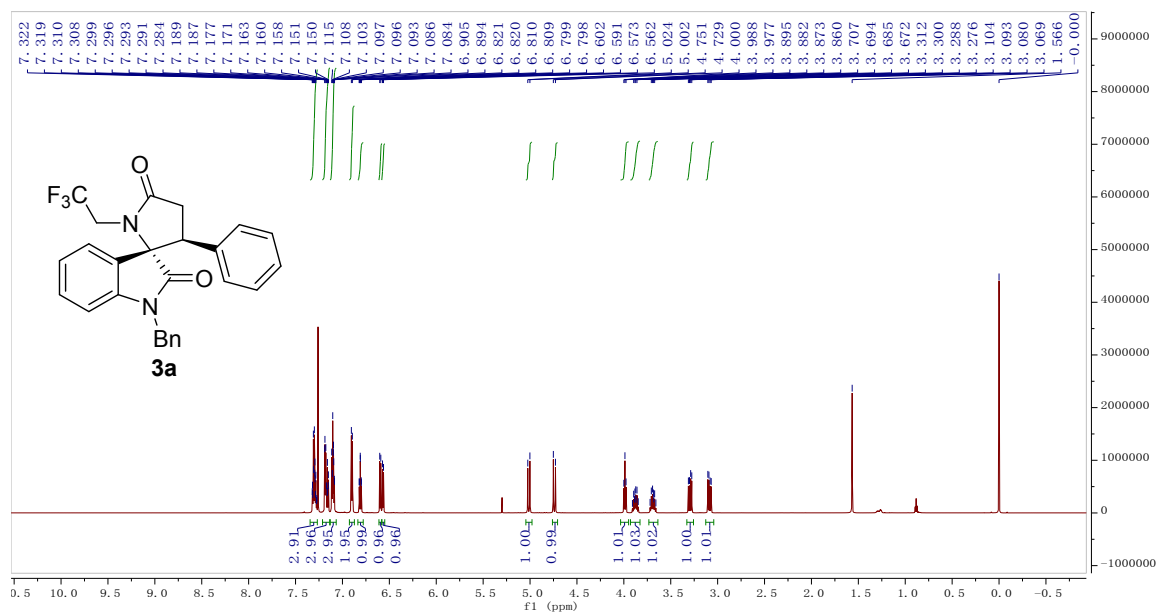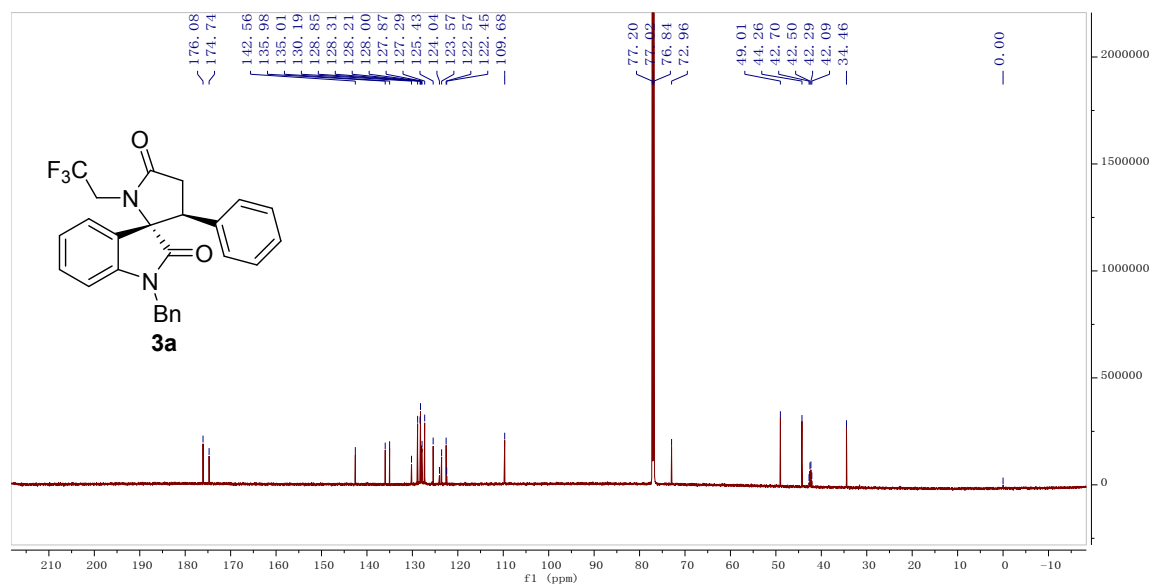

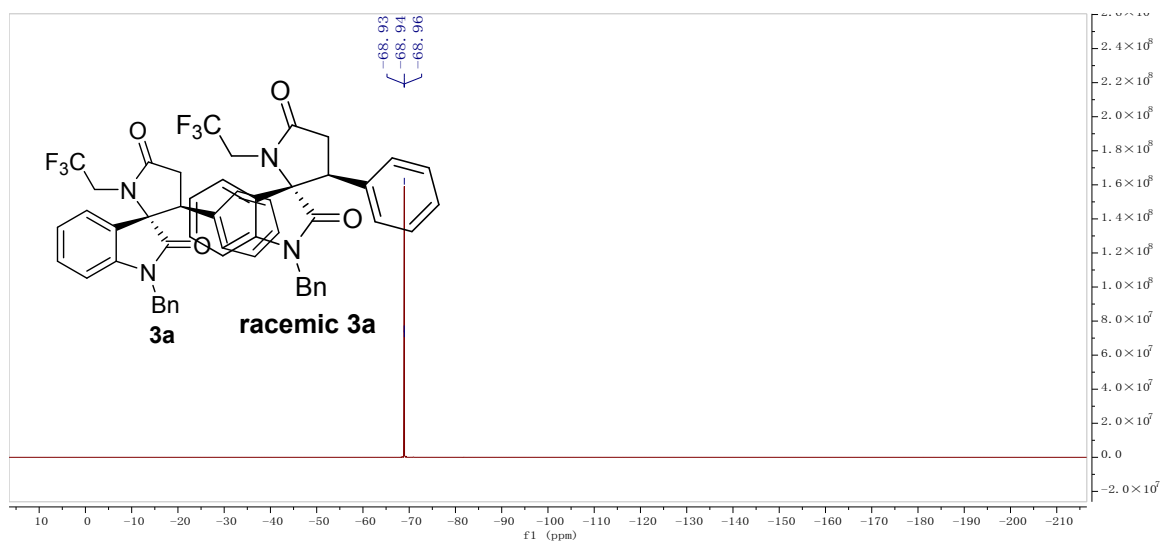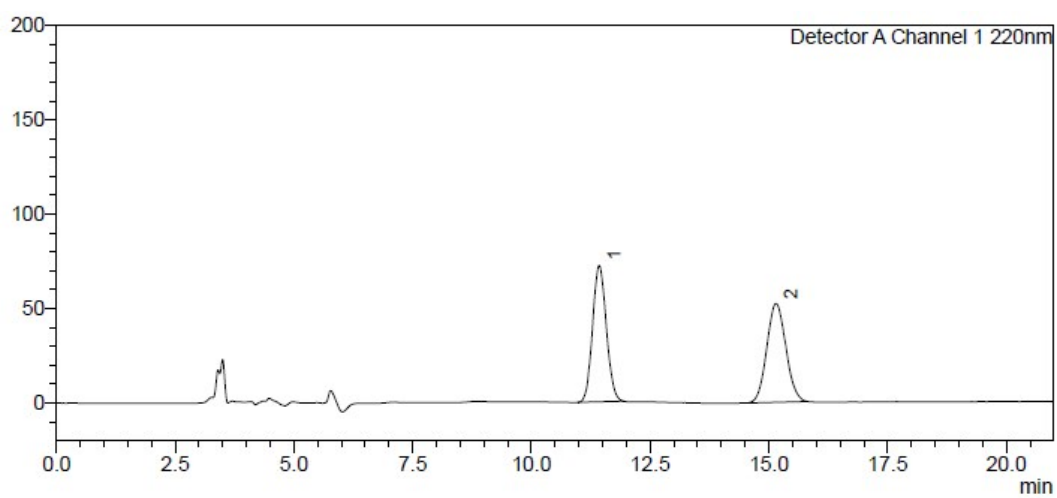

**<Peak Table>**

Detector A Channel 1 220nm

| Peak# | Ret. Time | Area    | Height | Conc.  | Area%   |
|-------|-----------|---------|--------|--------|---------|
| 1     | 11.429    | 1455013 | 72196  | 49.892 | 49.892  |
| 2     | 15.153    | 1461320 | 52357  | 50.108 | 50.108  |
| Total |           | 2916333 | 124552 |        | 100.000 |

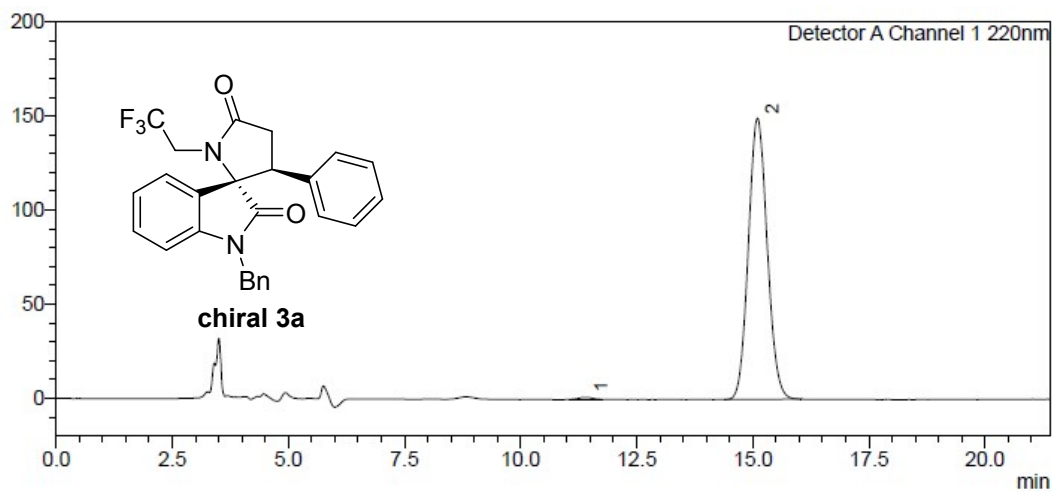

<Peak Table>

Detector A Channel 1 220nm

| Peak# | Ret. Time | Area    | Height | Conc.  | Area%   |
|-------|-----------|---------|--------|--------|---------|
| 1     | 11.405    | 21543   | 1090   | 0.509  | 0.509   |
| 2     | 15.102    | 4209138 | 149398 | 99.491 | 99.491  |
| Total |           | 4230681 | 150488 |        | 100.000 |



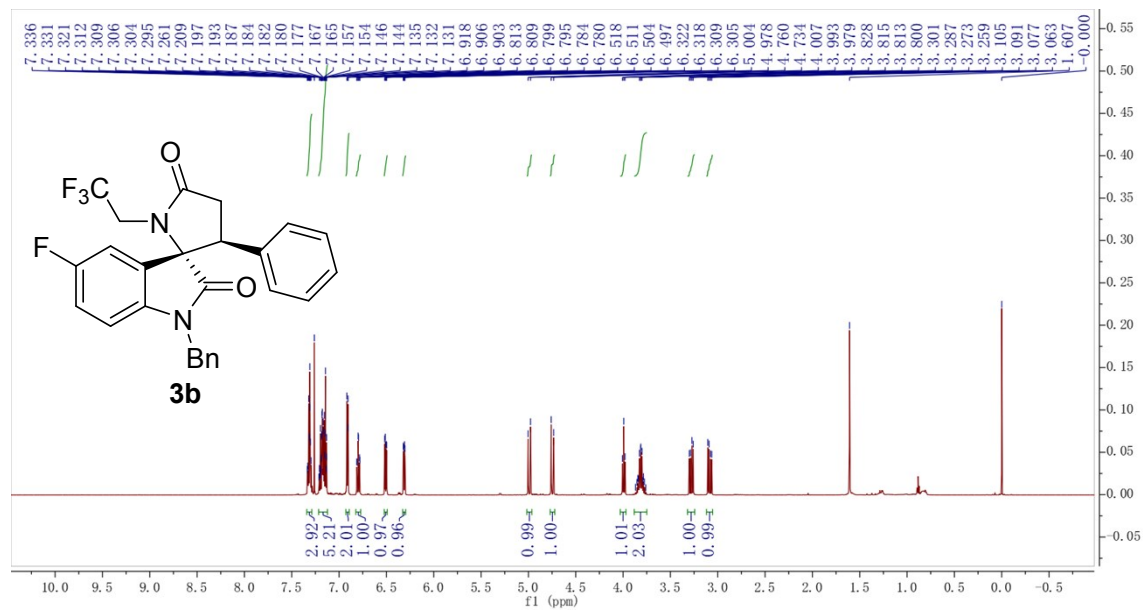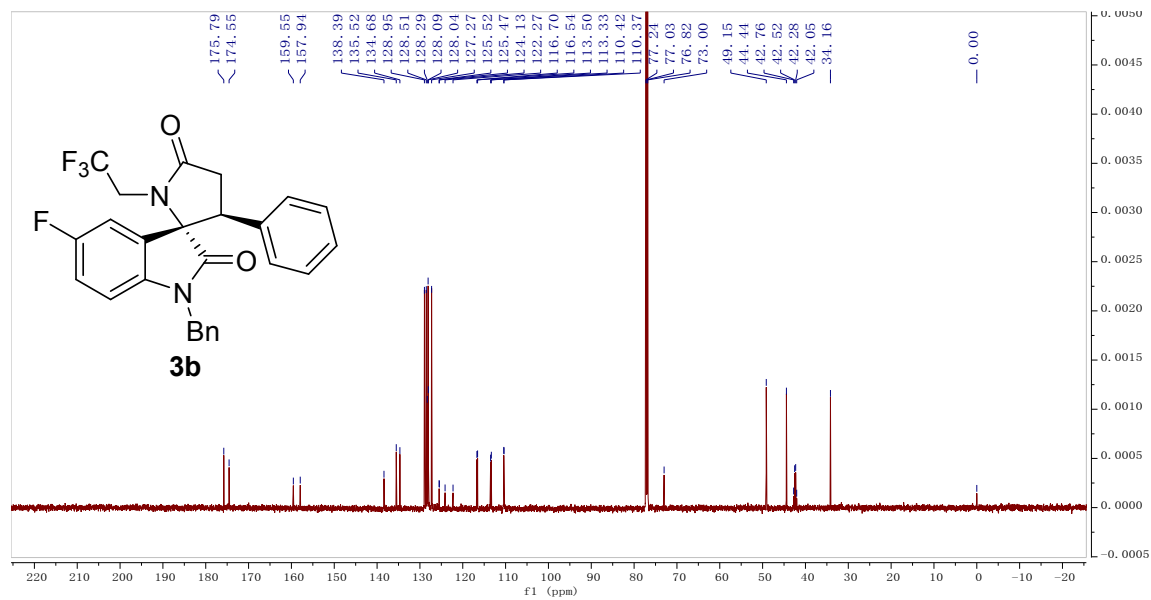

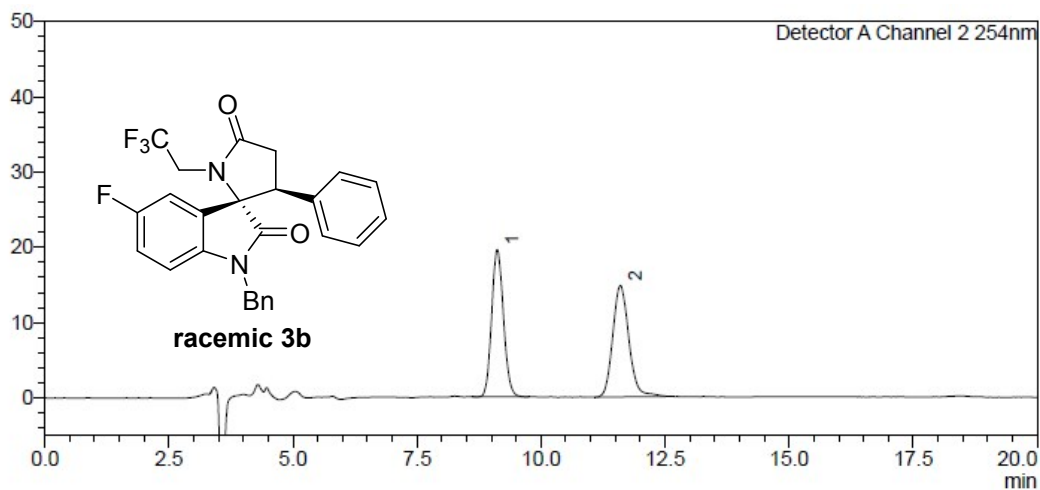

**<Peak Table>**

Detector A Channel 2 254nm

| Peak# | Ret. Time | Area   | Height | Conc.  | Area%   |
|-------|-----------|--------|--------|--------|---------|
| 1     | 9.118     | 323771 | 19576  | 49.090 | 49.090  |
| 2     | 11.598    | 335777 | 14817  | 50.910 | 50.910  |
| Total |           | 659548 | 34392  |        | 100.000 |

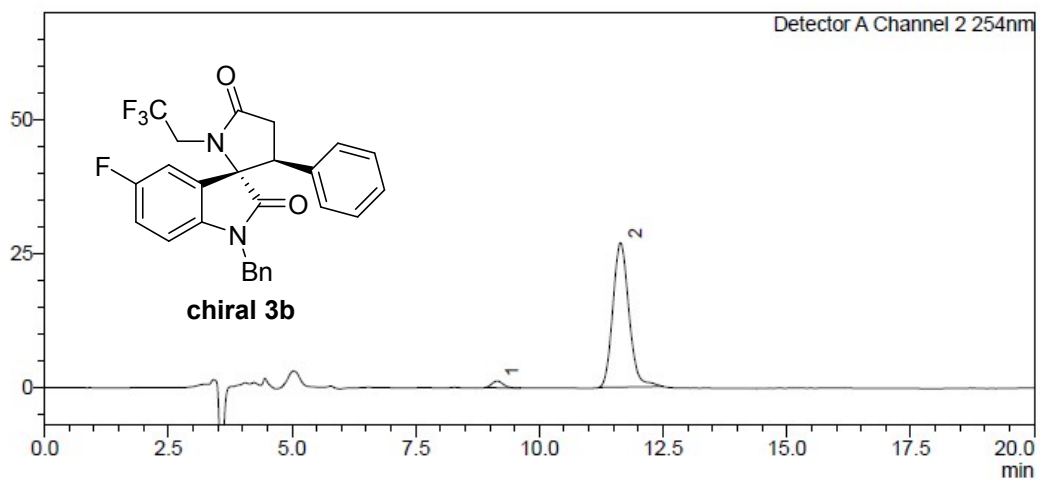

**<Peak Table>**

Detector A Channel 2 254nm

| Peak# | Ret. Time | Area   | Height | Conc.  | Area%   |
|-------|-----------|--------|--------|--------|---------|
| 1     | 9.146     | 20575  | 1271   | 3.262  | 3.262   |
| 2     | 11.638    | 610164 | 26960  | 96.738 | 96.738  |
| Total |           | 630739 | 28231  |        | 100.000 |

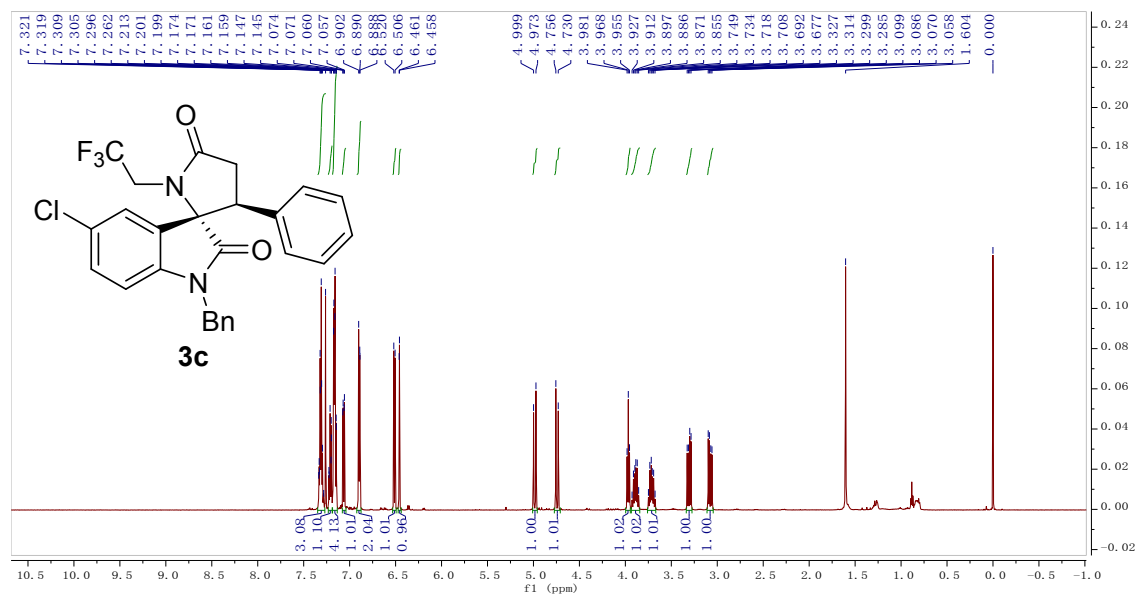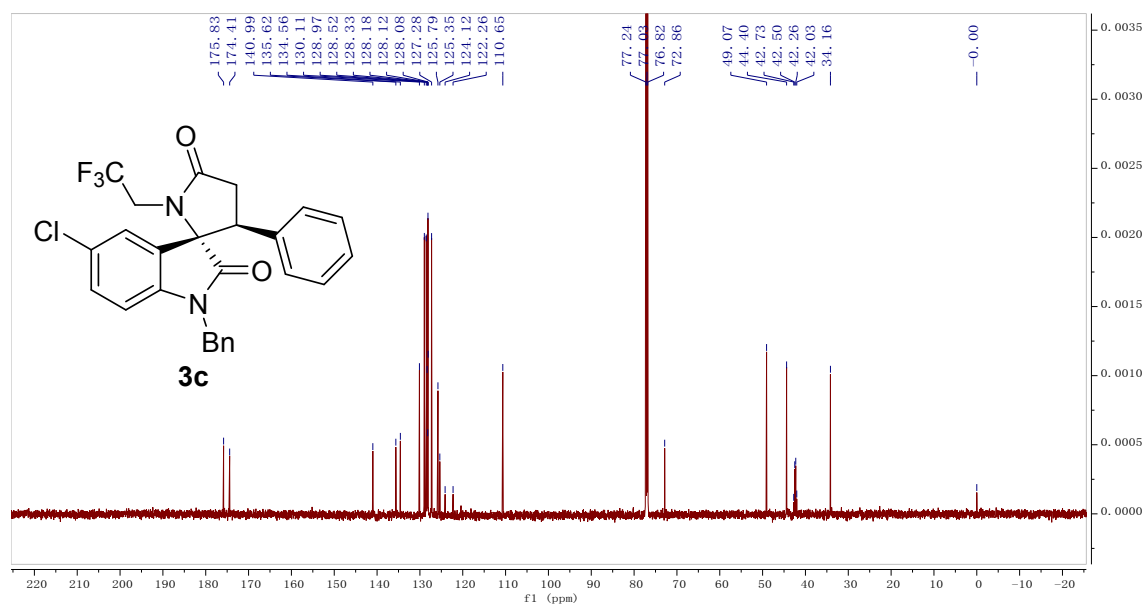

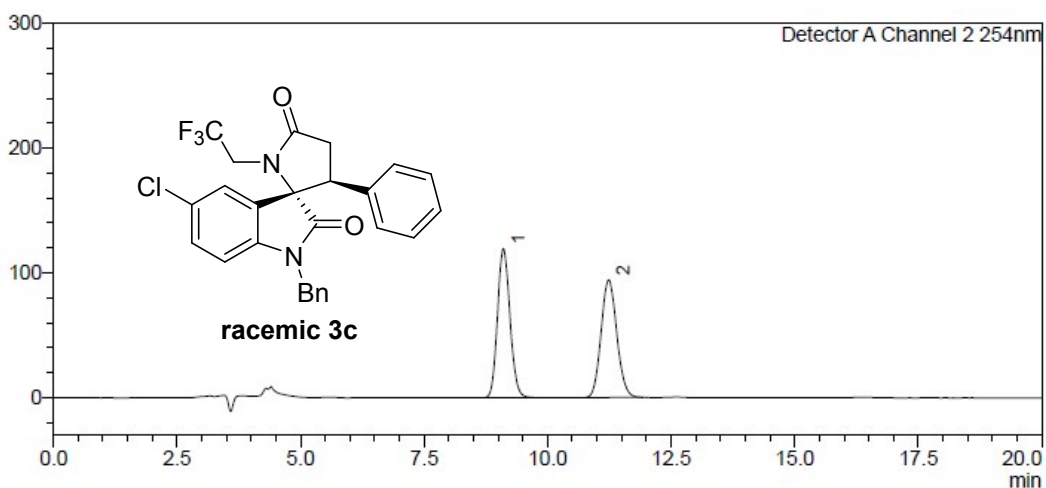

<Peak Table>

Detector A Channel 2 254nm

| Peak# | Ret. Time | Area    | Height | Conc.  | Area%   |
|-------|-----------|---------|--------|--------|---------|
| 1     | 9.105     | 2096127 | 119430 | 50.156 | 50.156  |
| 2     | 11.236    | 2082021 | 94269  | 49.818 | 49.818  |
| 3     | 28.924    | 1069    | 64     | 0.026  | 0.026   |
| Total |           | 4179218 | 213763 |        | 100.000 |

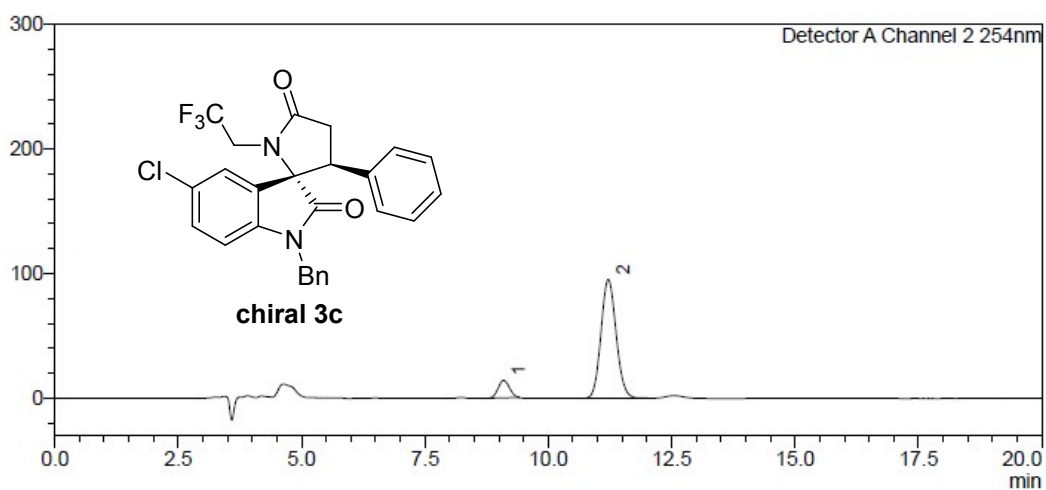

<Peak Table>

Detector A Channel 2 254nm

| Peak# | Ret. Time | Area    | Height | Conc.  | Area%   |
|-------|-----------|---------|--------|--------|---------|
| 1     | 9.097     | 222867  | 13989  | 9.876  | 9.876   |
| 2     | 11.216    | 2033727 | 95279  | 90.124 | 90.124  |
| Total |           | 2256594 | 109268 |        | 100.000 |

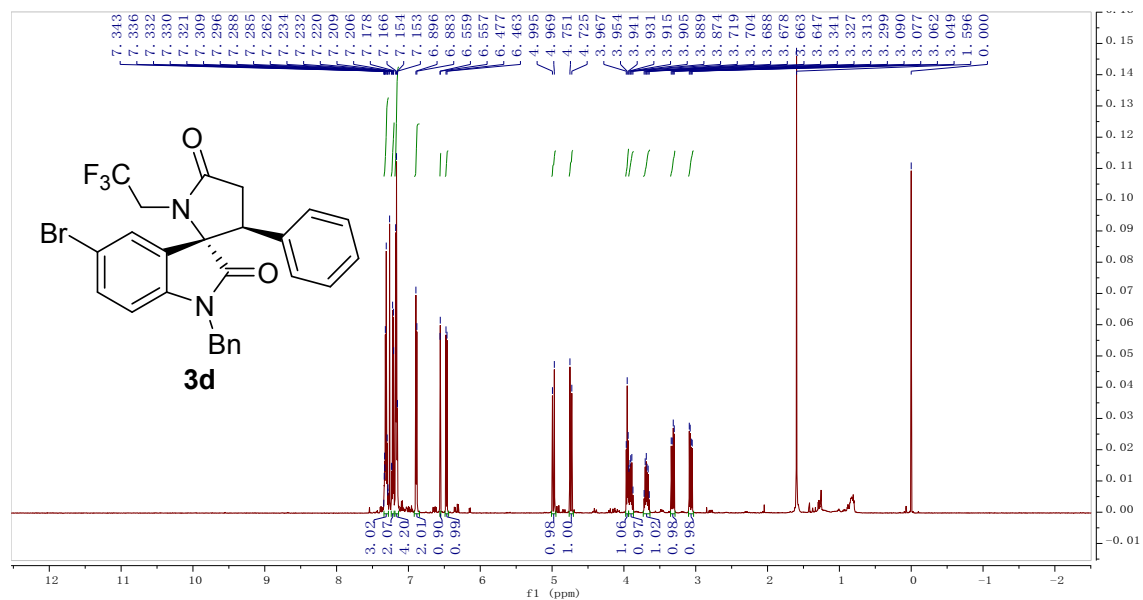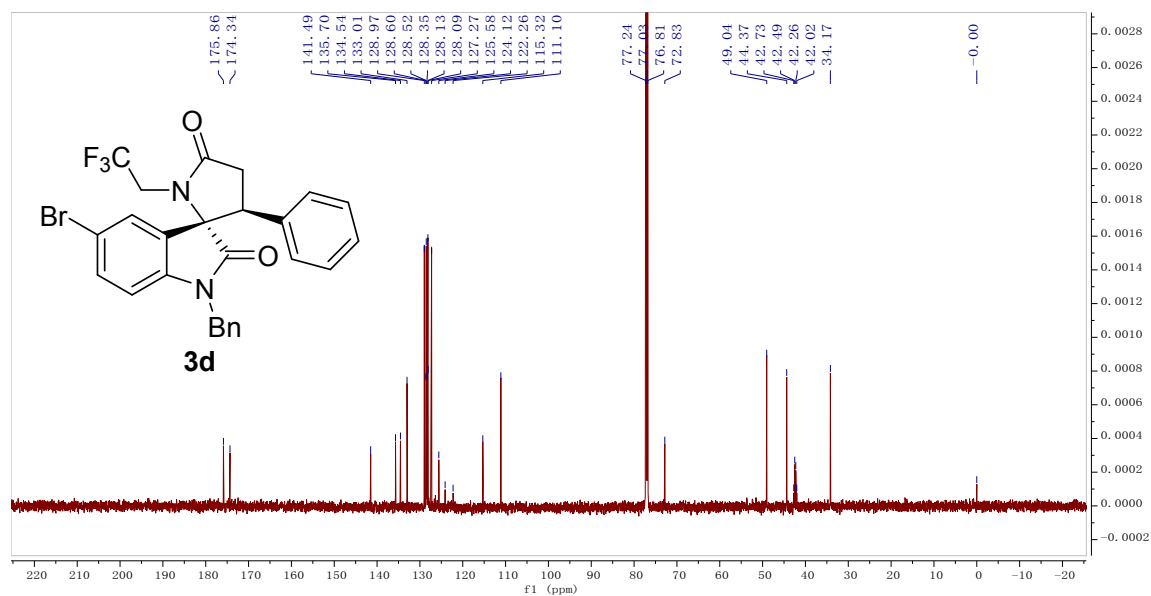

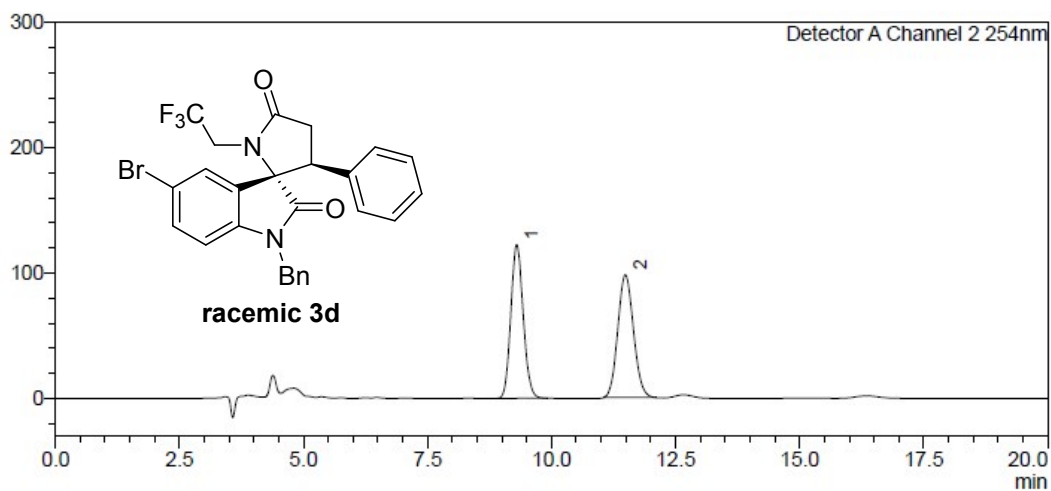

**<Peak Table>**

Detector A Channel 2 254nm

| Peak# | Ret. Time | Area    | Height | Conc.  | Area%   |
|-------|-----------|---------|--------|--------|---------|
| 1     | 9.298     | 2136081 | 122696 | 49.830 | 49.830  |
| 2     | 11.488    | 2150695 | 97845  | 50.170 | 50.170  |
| Total |           | 4286776 | 220541 |        | 100.000 |

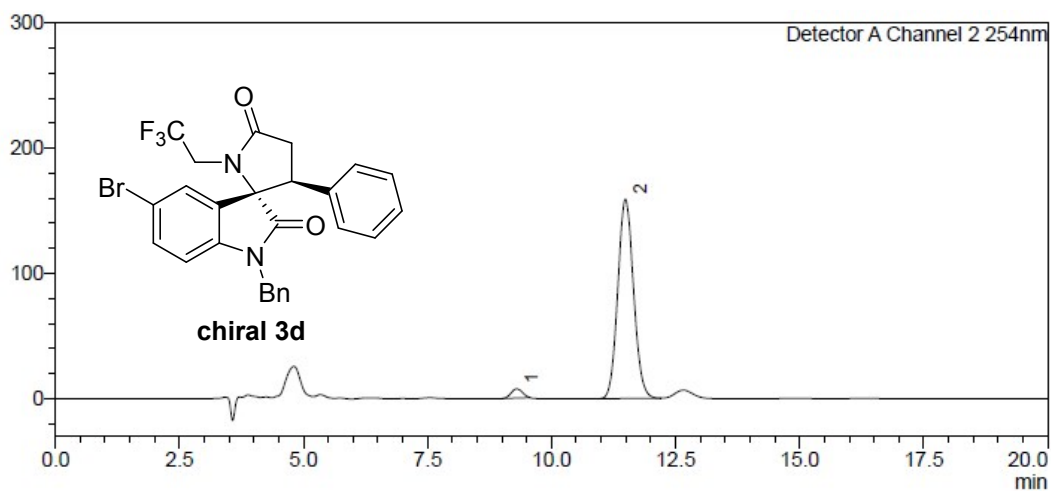

**<Peak Table>**

Detector A Channel 2 254nm

| Peak# | Ret. Time | Area    | Height | Conc.  | Area%   |
|-------|-----------|---------|--------|--------|---------|
| 1     | 9.301     | 118382  | 7535   | 3.261  | 3.261   |
| 2     | 11.489    | 3511840 | 159015 | 96.739 | 96.739  |
| Total |           | 3630222 | 166550 |        | 100.000 |

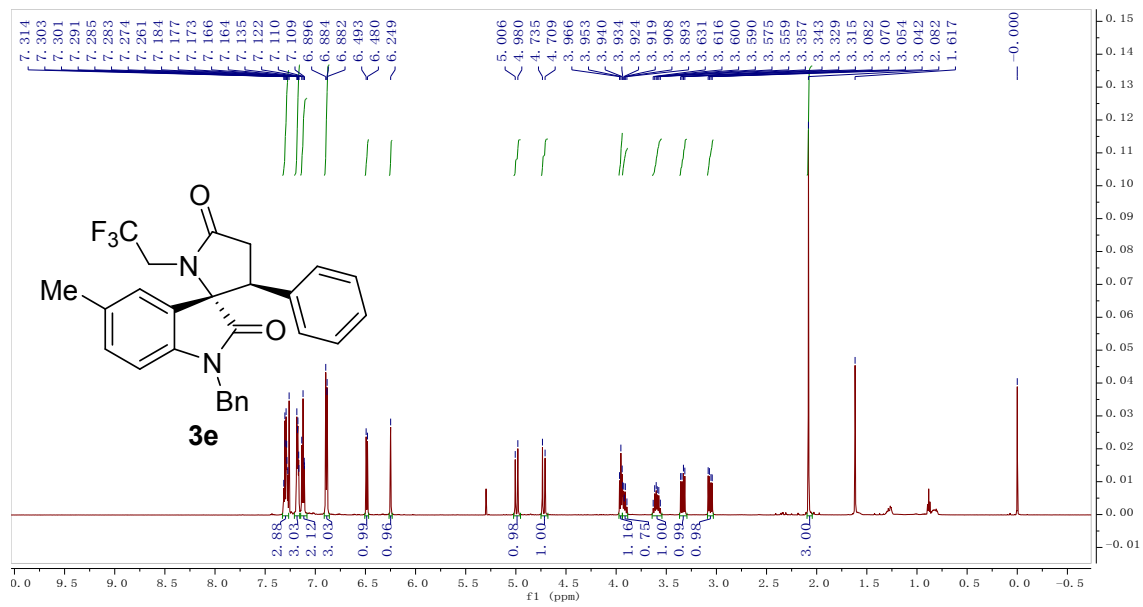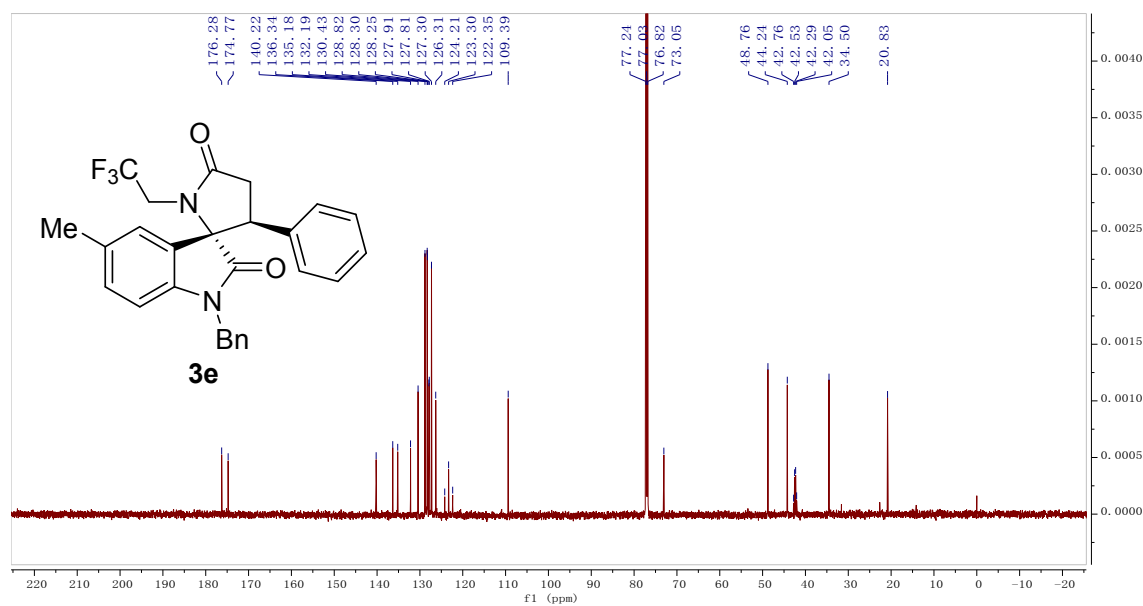

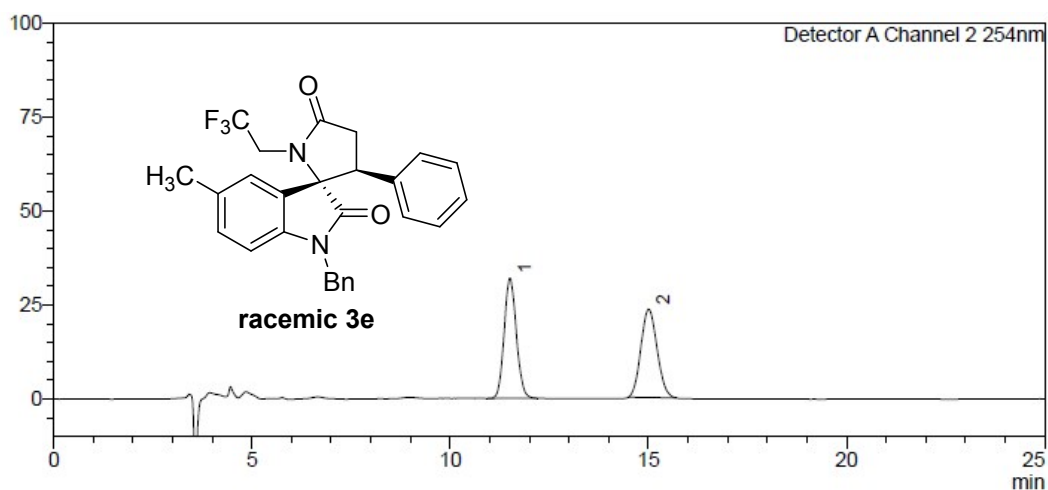

<Peak Table>

Detector A Channel 2 254nm

| Peak# | Ret. Time | Area    | Height | Conc.  | Area%   |
|-------|-----------|---------|--------|--------|---------|
| 1     | 11.510    | 685046  | 31998  | 50.695 | 50.695  |
| 2     | 15.008    | 666254  | 23490  | 49.305 | 49.305  |
| Total |           | 1351301 | 55488  |        | 100.000 |

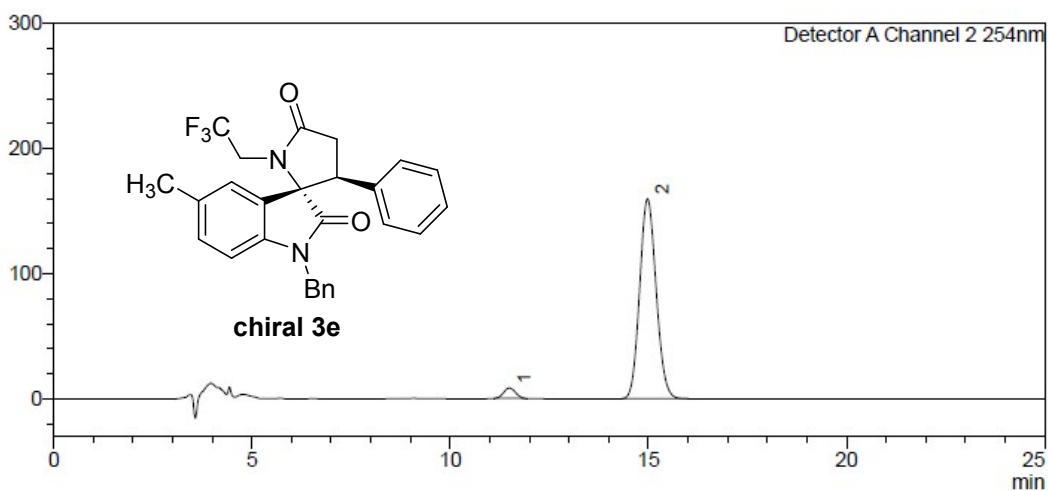

<Peak Table>

Detector A Channel 2 254nm

| Peak# | Ret. Time | Area    | Height | Conc.  | Area%   |
|-------|-----------|---------|--------|--------|---------|
| 1     | 11.496    | 173152  | 8454   | 3.613  | 3.613   |
| 2     | 14.980    | 4618683 | 159636 | 96.387 | 96.387  |
| Total |           | 4791835 | 168090 |        | 100.000 |



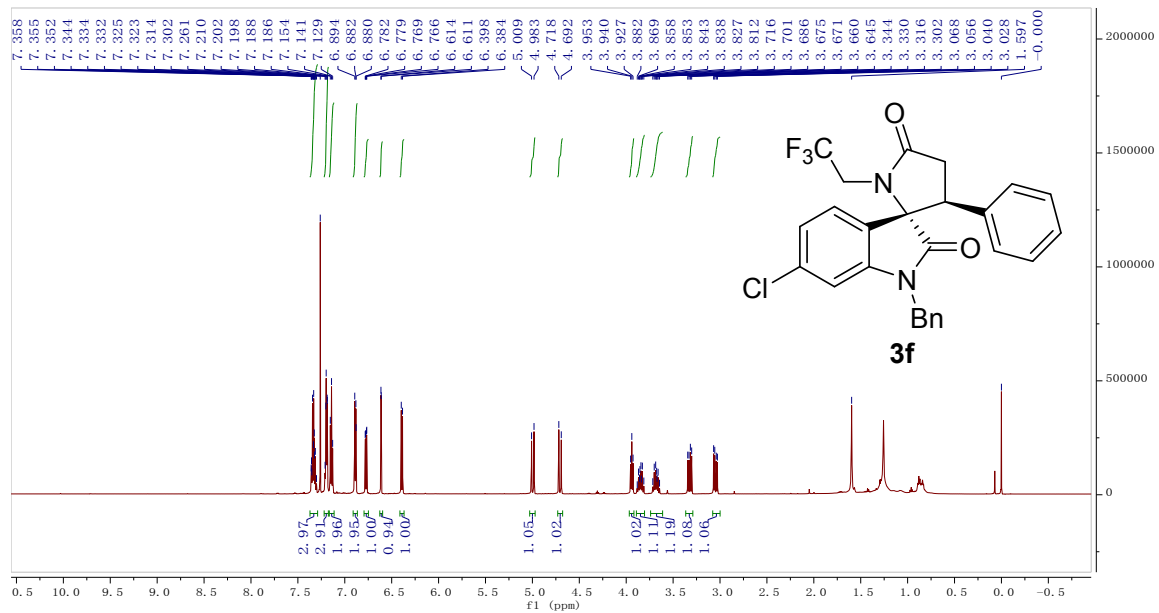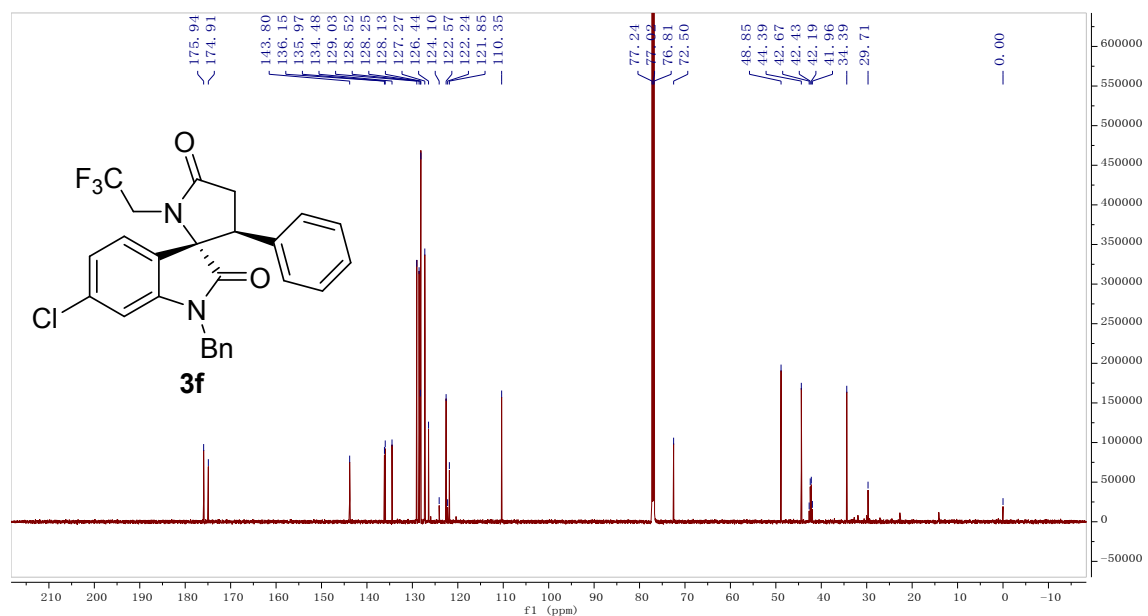

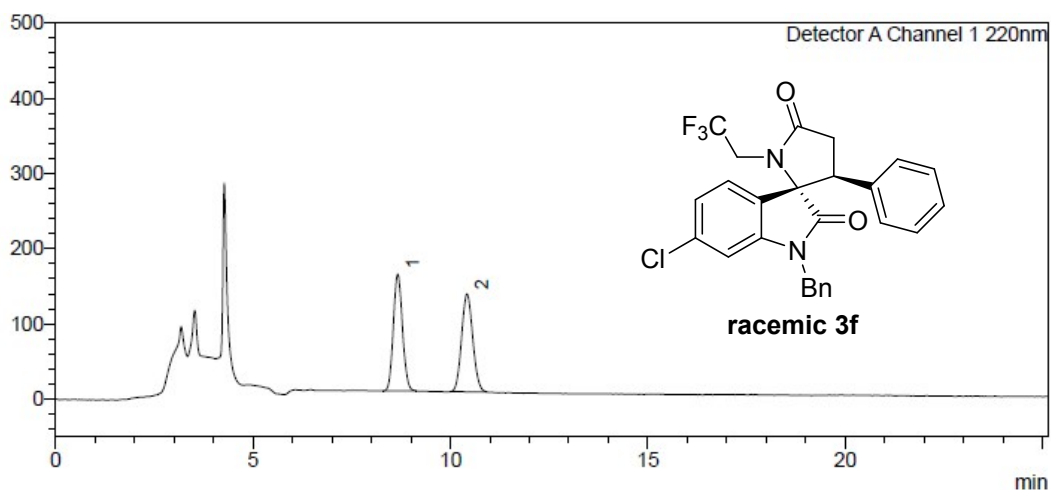

<Peak Table>

Detector A Channel 1 220nm

| Peak# | Ret. Time | Area    | Height | Conc.  | Area%   |
|-------|-----------|---------|--------|--------|---------|
| 1     | 8.667     | 2495640 | 155327 | 49.404 | 49.404  |
| 2     | 10.421    | 2555818 | 130033 | 50.596 | 50.596  |
| Total |           | 5051458 | 285360 |        | 100.000 |

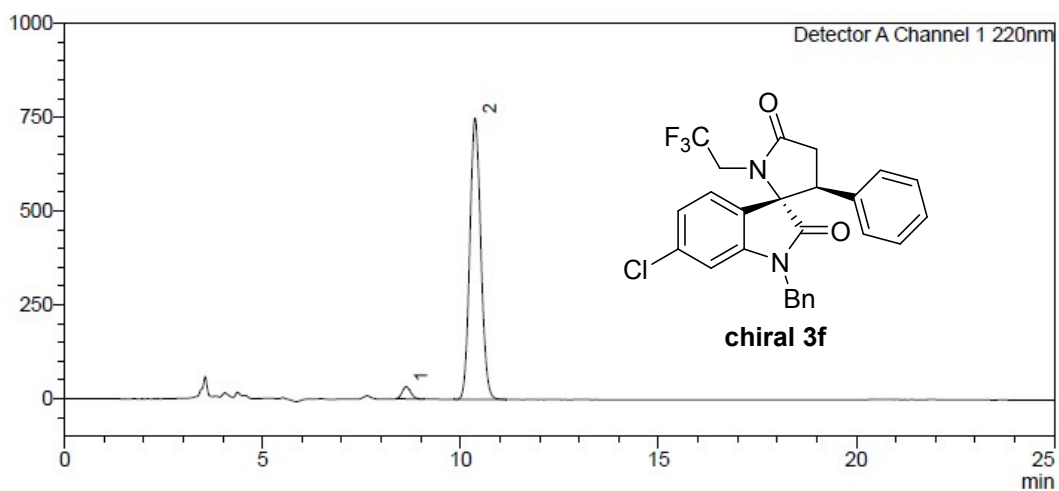

<Peak Table>

Detector A Channel 1 220nm

| Peak# | Ret. Time | Area     | Height | Conc.  | Area%   |
|-------|-----------|----------|--------|--------|---------|
| 1     | 8.630     | 492651   | 32264  | 3.282  | 3.282   |
| 2     | 10.370    | 14519440 | 749884 | 96.718 | 96.718  |
| Total |           | 15012091 | 782148 |        | 100.000 |

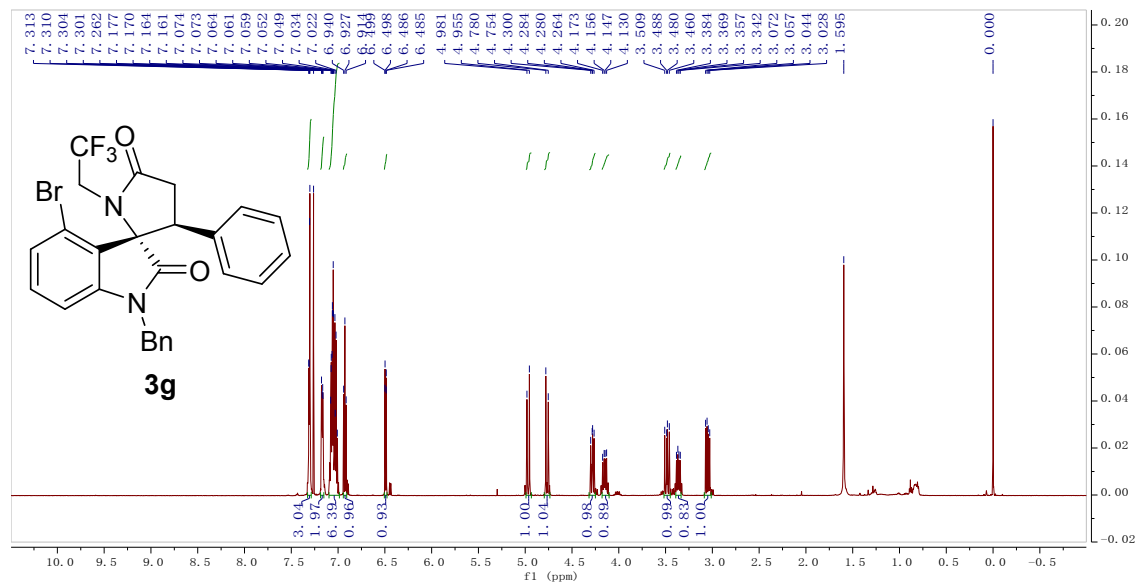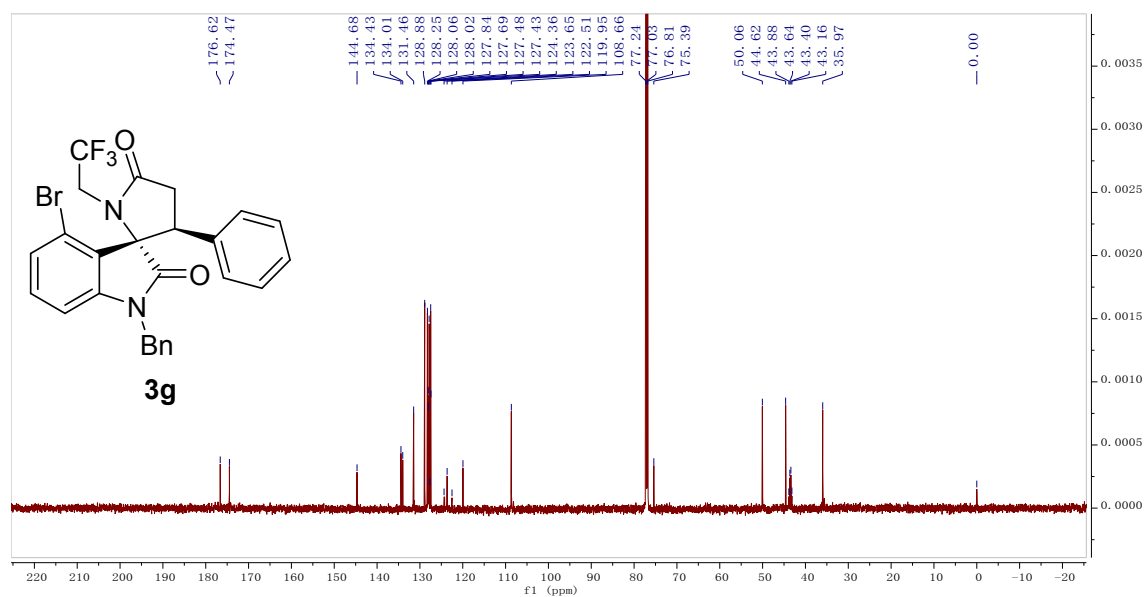

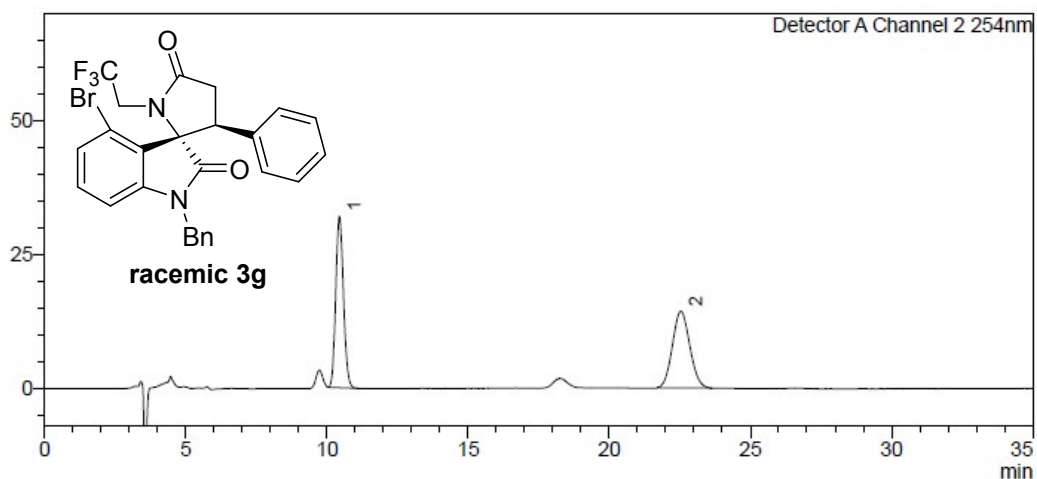

**<Peak Table>**

Detector A Channel 2 254nm

| Peak# | Ret. Time | Area    | Height | Conc.  | Area%   |
|-------|-----------|---------|--------|--------|---------|
| 1     | 10.445    | 607340  | 32023  | 49.904 | 49.904  |
| 2     | 22.542    | 609677  | 14308  | 50.096 | 50.096  |
| Total |           | 1217017 | 46331  |        | 100.000 |

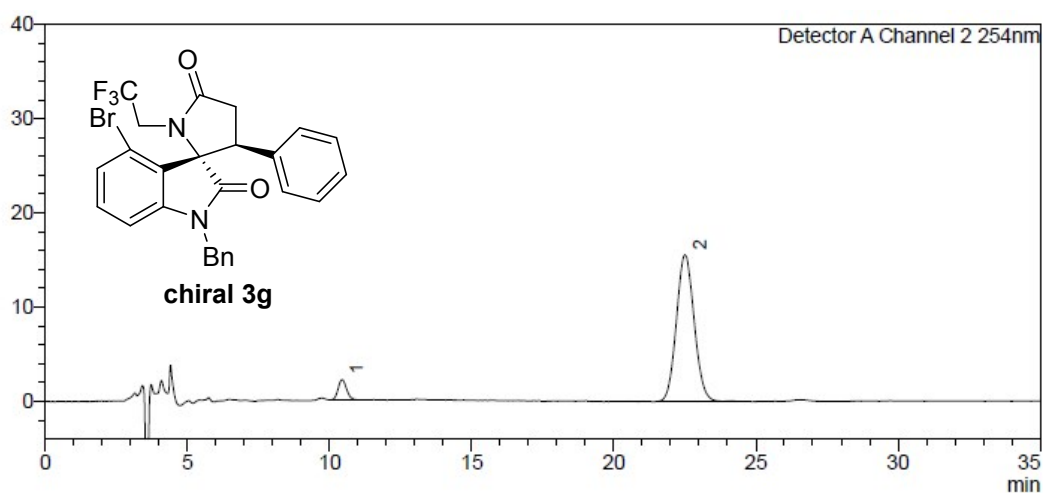

**<Peak Table>**

Detector A Channel 2 254nm

| Peak# | Ret. Time | Area   | Height | Conc.  | Area%   |
|-------|-----------|--------|--------|--------|---------|
| 1     | 10.437    | 44467  | 2177   | 6.171  | 6.171   |
| 2     | 22.509    | 676111 | 15577  | 93.829 | 93.829  |
| Total |           | 720578 | 17754  |        | 100.000 |

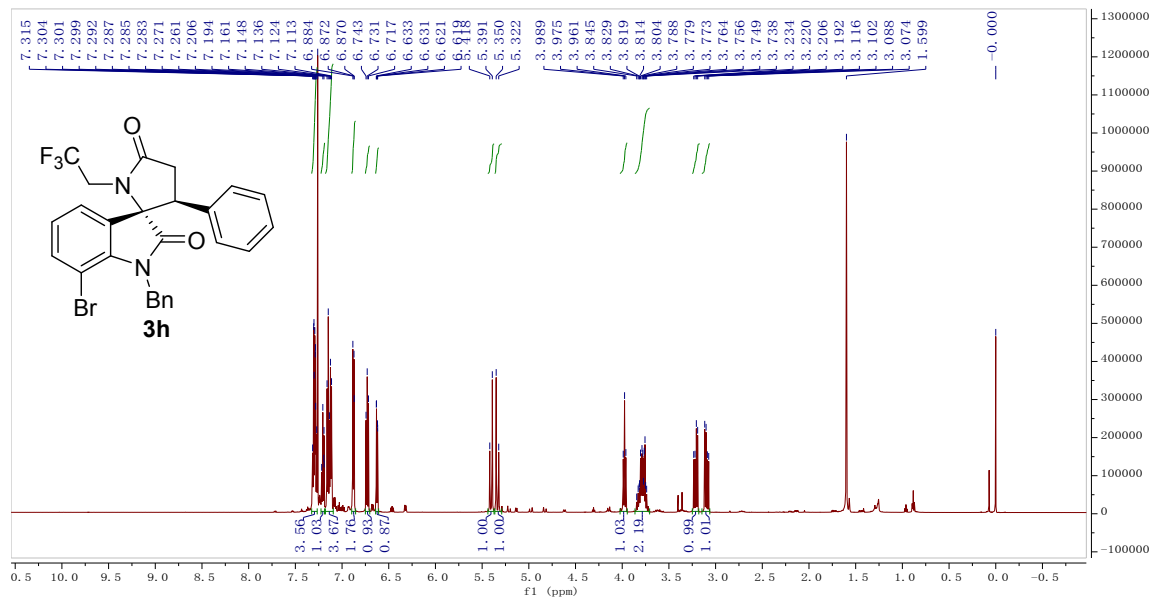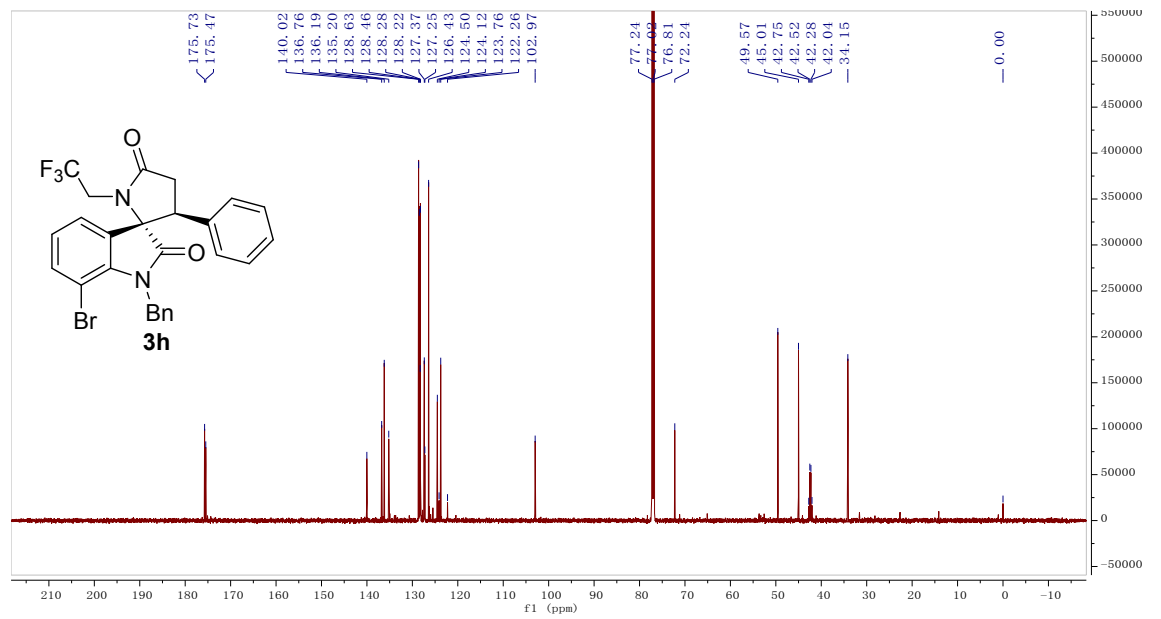

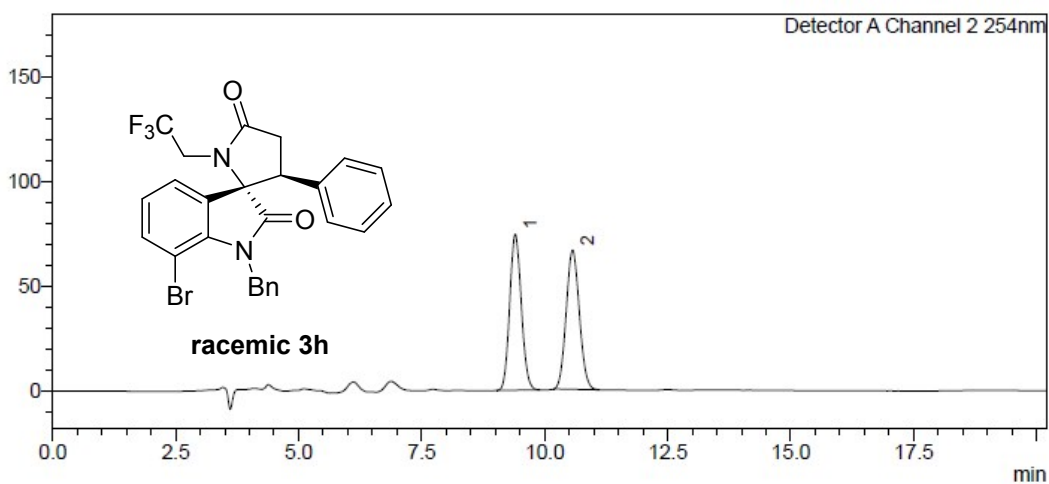

<Peak Table>

Detector A Channel 2 254nm

| Peak# | Ret. Time | Area    | Height | Conc.  | Area%   |
|-------|-----------|---------|--------|--------|---------|
| 1     | 9.402     | 1222916 | 74523  | 49.678 | 49.678  |
| 2     | 10.568    | 1238762 | 66482  | 50.322 | 50.322  |
| Total |           | 2461679 | 141005 |        | 100.000 |

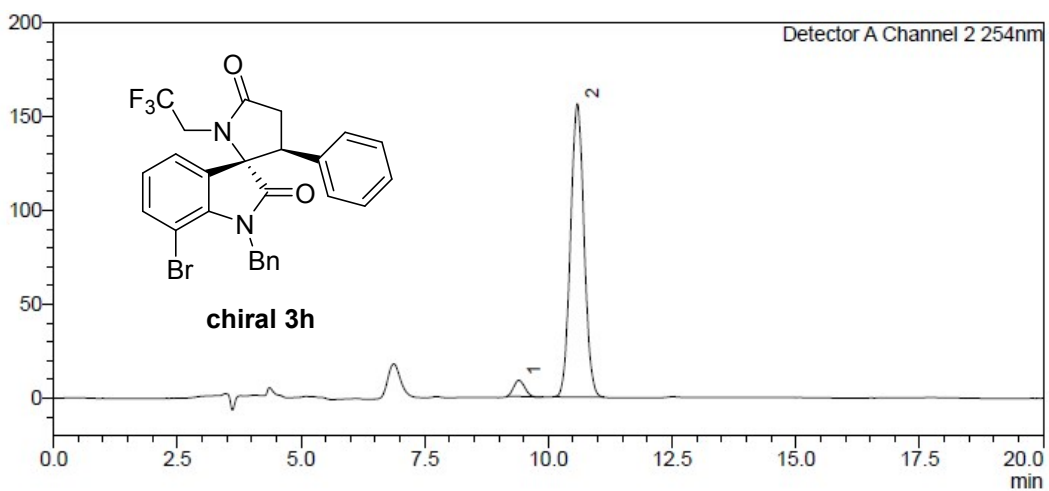

<Peak Table>

Detector A Channel 2 254nm

| Peak# | Ret. Time | Area    | Height | Conc.  | Area%   |
|-------|-----------|---------|--------|--------|---------|
| 1     | 9.404     | 130889  | 8571   | 4.217  | 4.217   |
| 2     | 10.584    | 2972670 | 156216 | 95.783 | 95.783  |
| Total |           | 3103559 | 164787 |        | 100.000 |

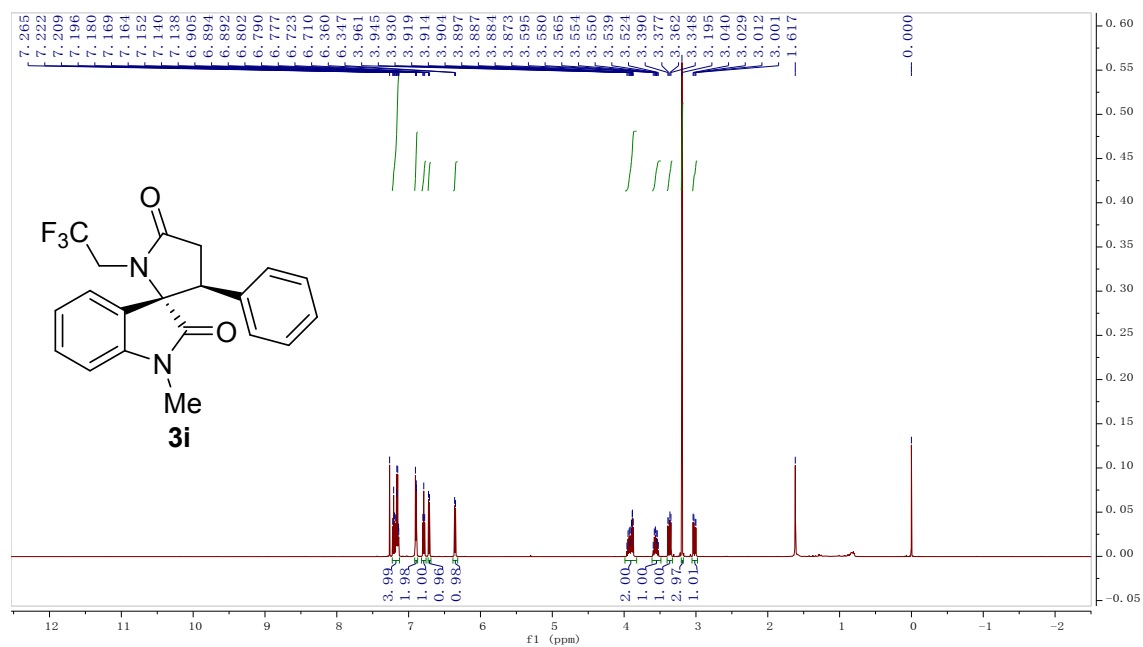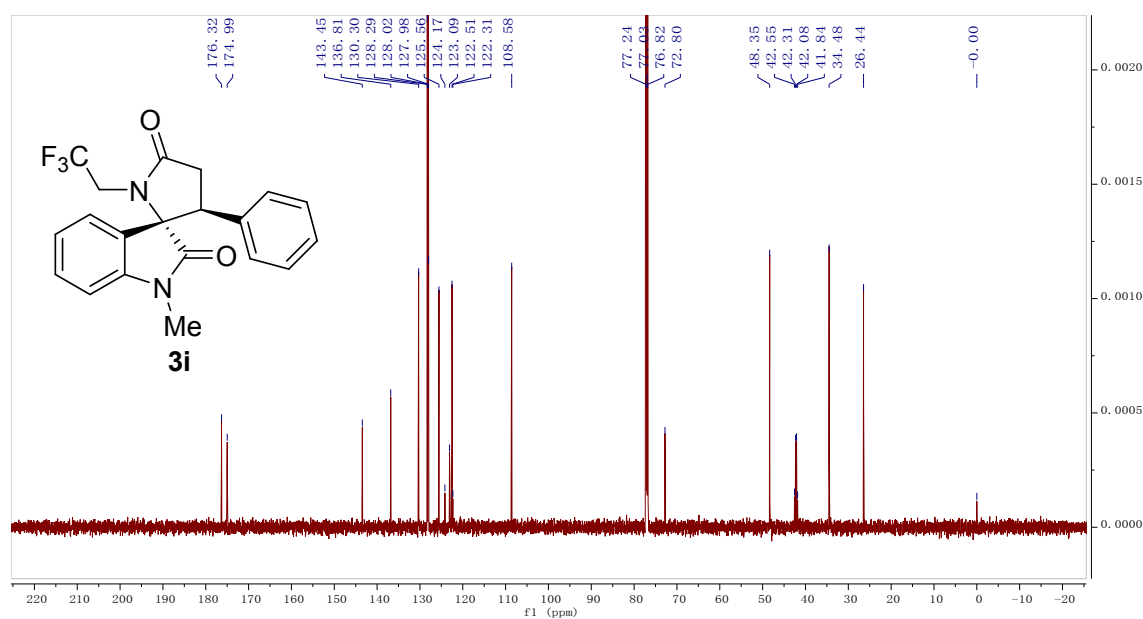

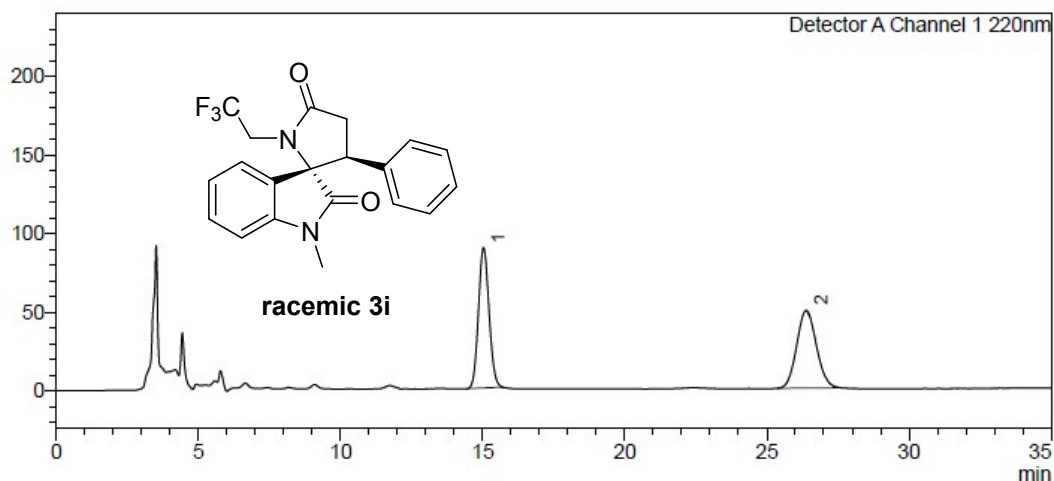

<Peak Table>

Detector A Channel 1 220nm

| Peak# | Ret. Time | Area    | Height | Conc.  | Area%   |
|-------|-----------|---------|--------|--------|---------|
| 1     | 15.033    | 2302562 | 89304  | 49.308 | 49.308  |
| 2     | 26.384    | 2367228 | 49442  | 50.692 | 50.692  |
| Total |           | 4669790 | 138746 |        | 100.000 |

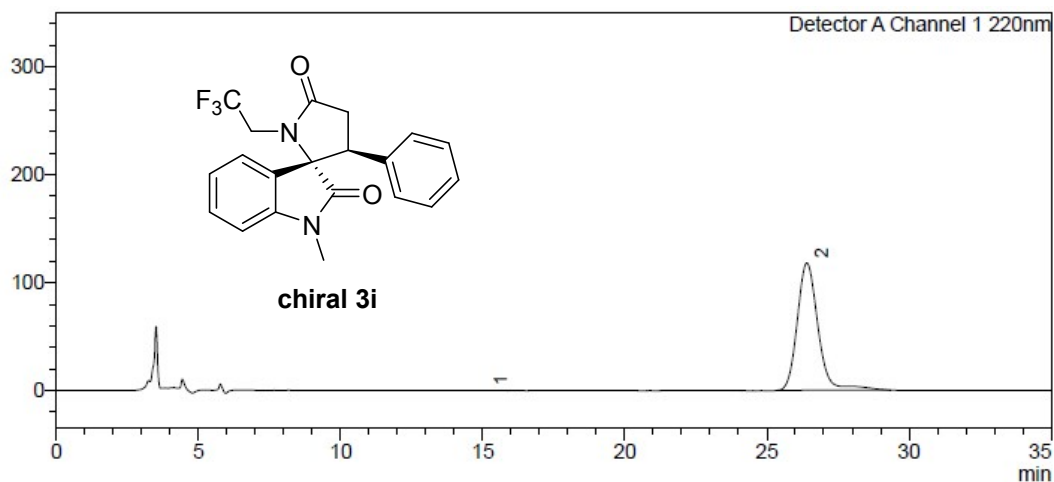

<Peak Table>

Detector A Channel 1 220nm

| Peak# | Ret. Time | Area    | Height | Conc.  | Area%   |
|-------|-----------|---------|--------|--------|---------|
| 1     | 15.105    | 803     | 149    | 0.013  | 0.013   |
| 2     | 26.406    | 5997234 | 117964 | 99.987 | 99.987  |
| Total |           | 5998037 | 118113 |        | 100.000 |



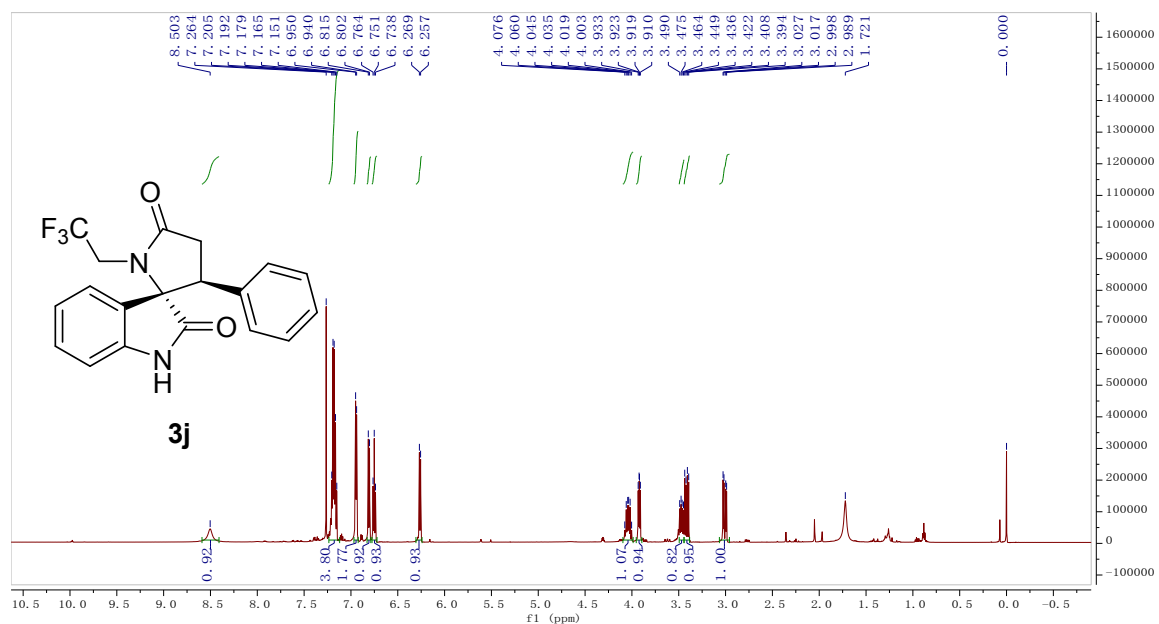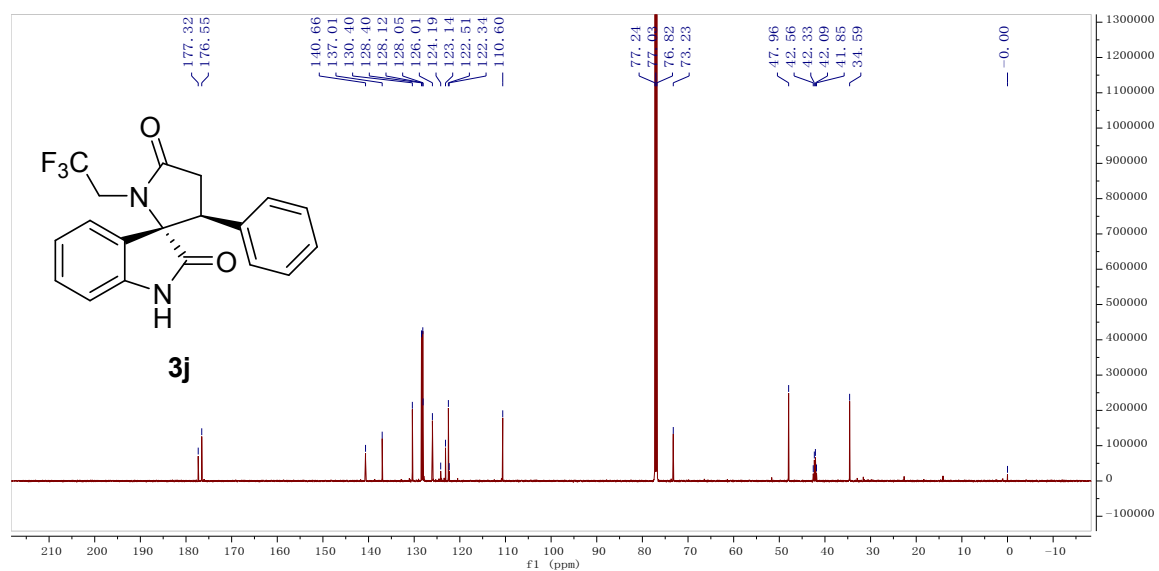

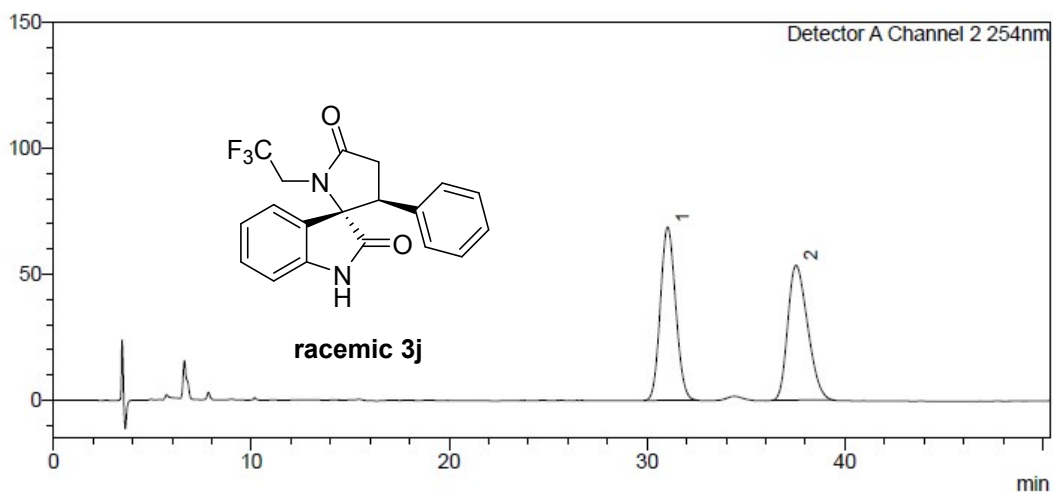

<Peak Table>

| Detector A Channel 2 254nm |           |         |        |        |         |
|----------------------------|-----------|---------|--------|--------|---------|
| Peak#                      | Ret. Time | Area    | Height | Conc.  | Area%   |
| 1                          | 31.039    | 3690610 | 68776  | 49.721 | 49.721  |
| 2                          | 37.528    | 3731956 | 53496  | 50.279 | 50.279  |
| Total                      |           | 7422566 | 122271 |        | 100.000 |

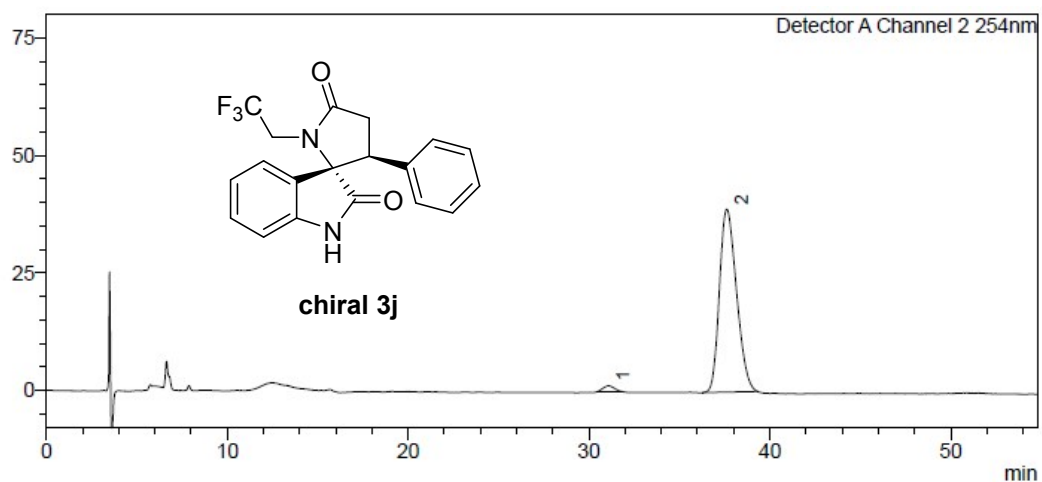

<Peak Table>

| Detector A Channel 2 254nm |           |         |        |        |         |
|----------------------------|-----------|---------|--------|--------|---------|
| Peak#                      | Ret. Time | Area    | Height | Conc.  | Area%   |
| 1                          | 31.076    | 56087   | 1286   | 2.149  | 2.149   |
| 2                          | 37.620    | 2553259 | 38927  | 97.851 | 97.851  |
| Total                      |           | 2609346 | 40213  |        | 100.000 |

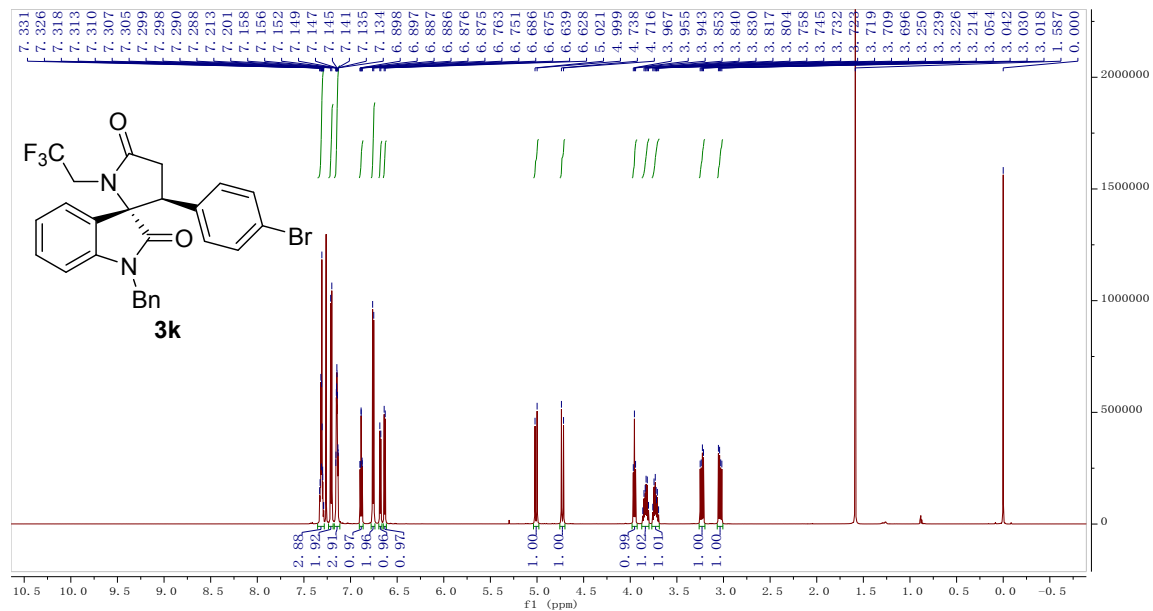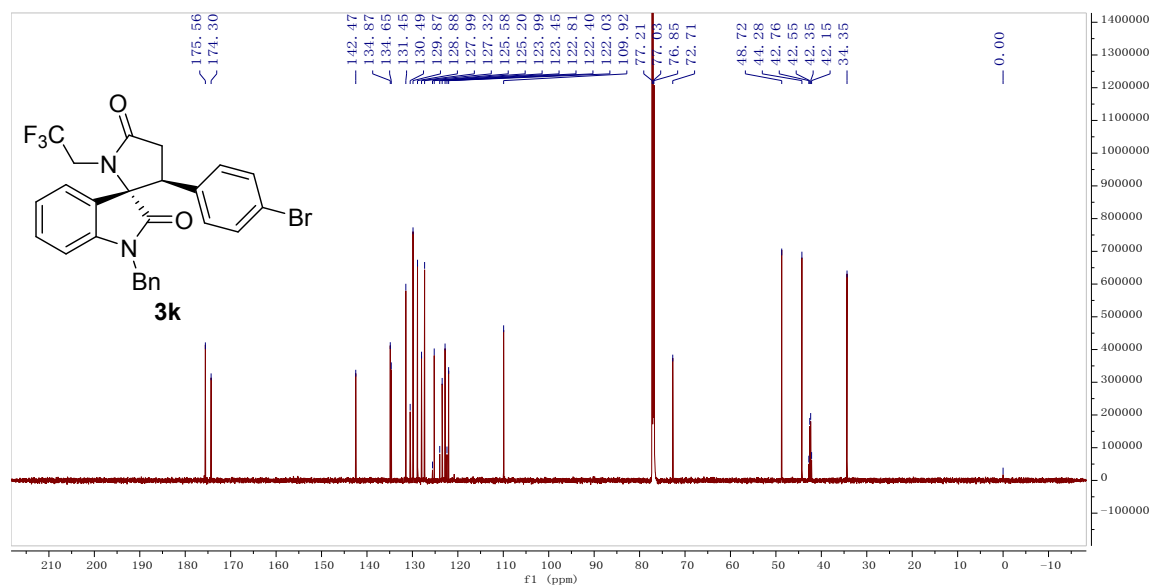

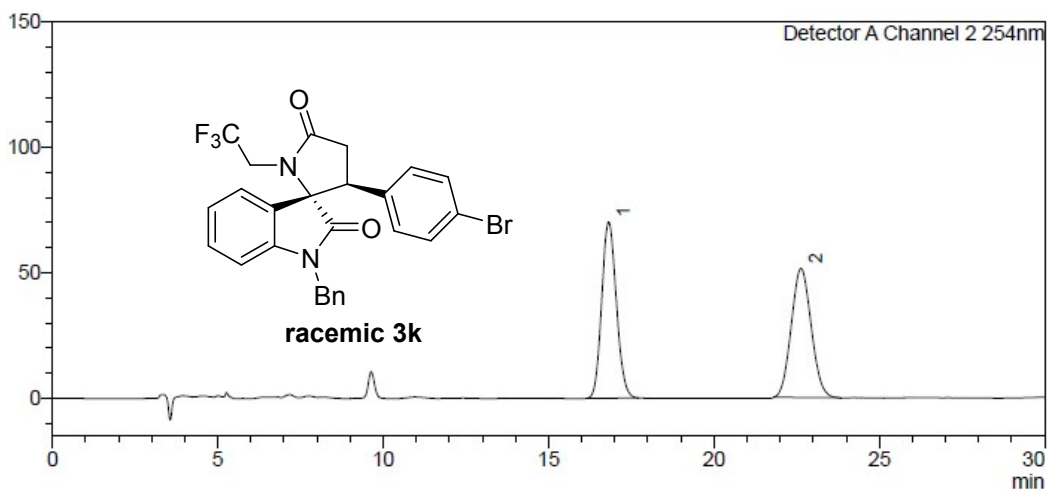

**<Peak Table>**

Detector A Channel 2 254nm

| Peak# | Ret. Time | Area    | Height | Conc.  | Area%   |
|-------|-----------|---------|--------|--------|---------|
| 1     | 16.817    | 2161316 | 70297  | 50.094 | 50.094  |
| 2     | 22.634    | 2153216 | 51422  | 49.906 | 49.906  |
| Total |           | 4314532 | 121719 |        | 100.000 |

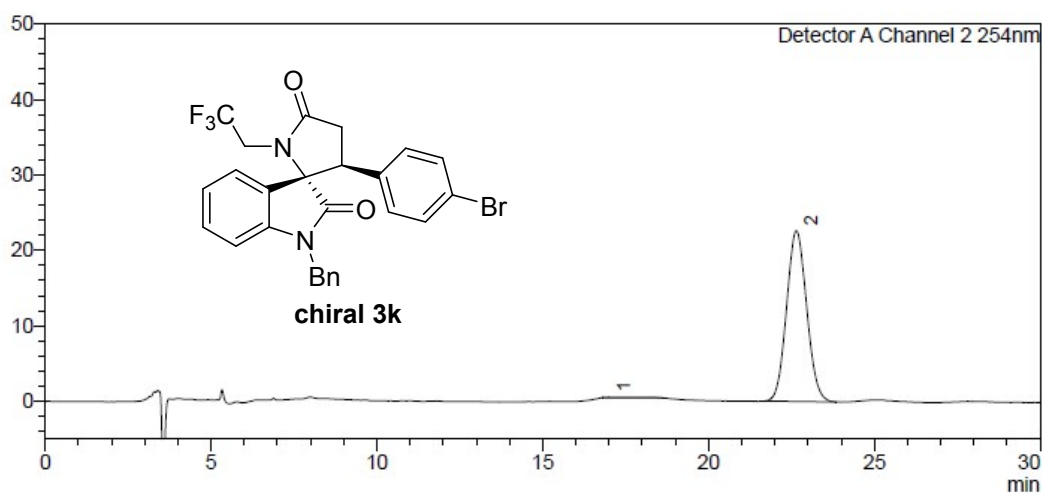

**<Peak Table>**

Detector A Channel 2 254nm

| Peak# | Ret. Time | Area   | Height | Conc.  | Area%   |
|-------|-----------|--------|--------|--------|---------|
| 1     | 16.990    | 3916   | 53     | 0.409  | 0.409   |
| 2     | 22.648    | 952441 | 22638  | 99.591 | 99.591  |
| Total |           | 956357 | 22691  |        | 100.000 |

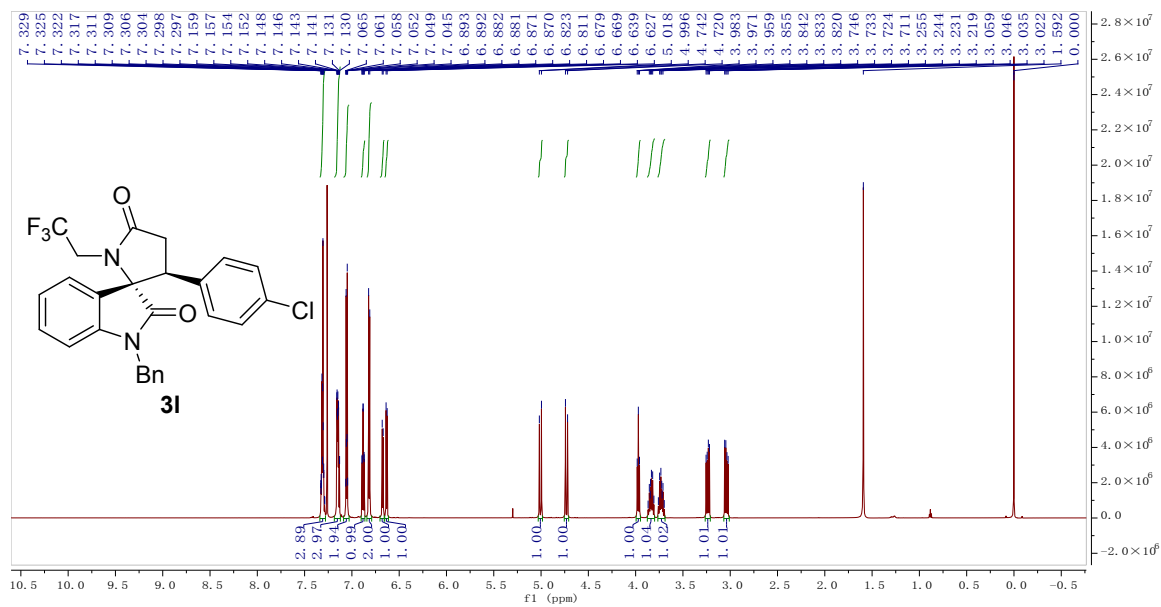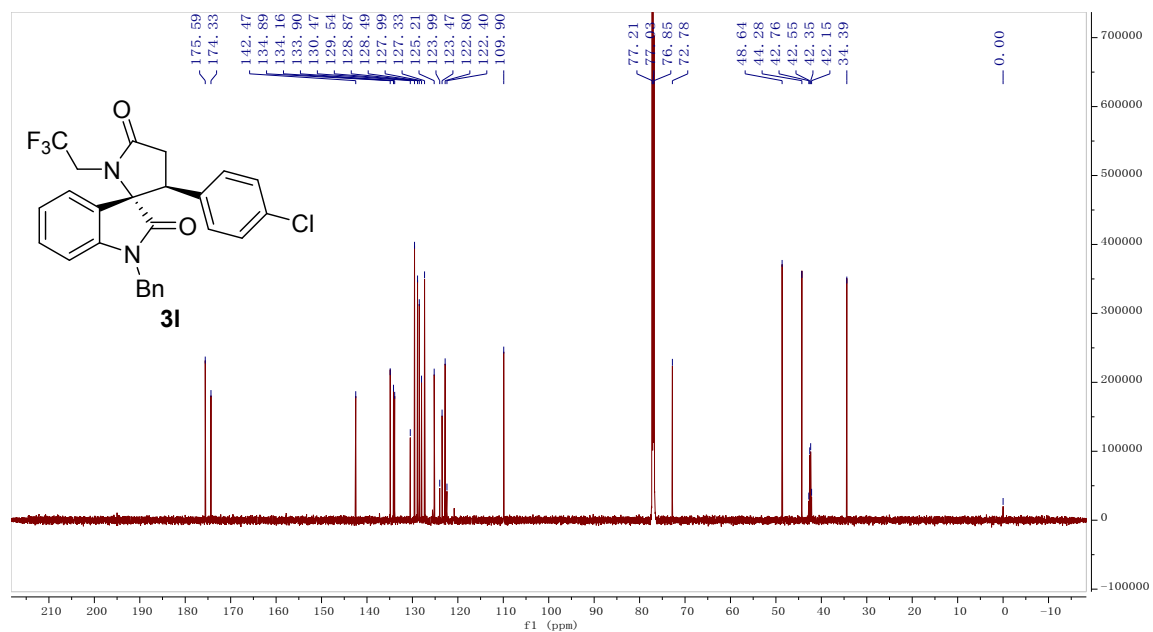

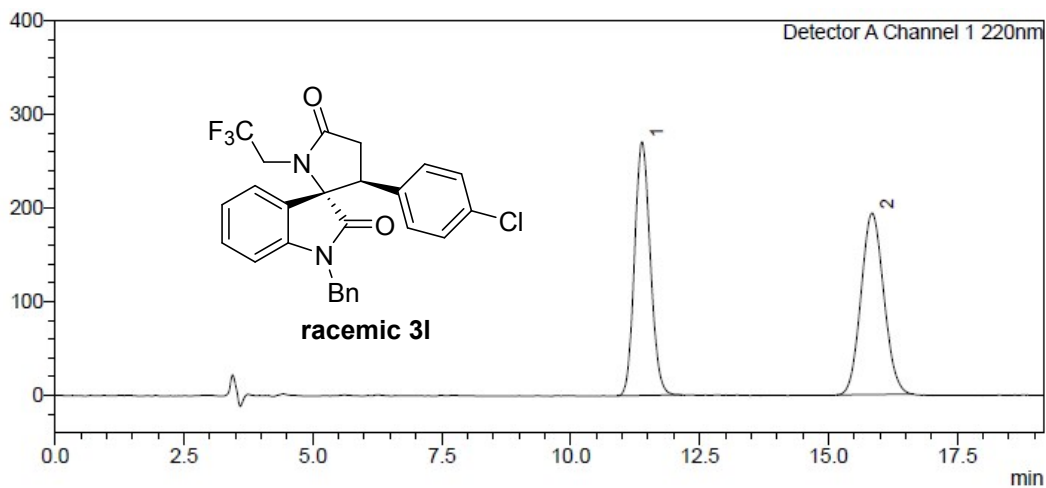

<Peak Table>

Detector A Channel 1 220nm

| Peak# | Ret. Time | Area     | Height | Conc.  | Area%   |
|-------|-----------|----------|--------|--------|---------|
| 1     | 11.384    | 5757039  | 270946 | 49.139 | 49.139  |
| 2     | 15.846    | 5958807  | 193730 | 50.861 | 50.861  |
| Total |           | 11715846 | 464676 |        | 100.000 |

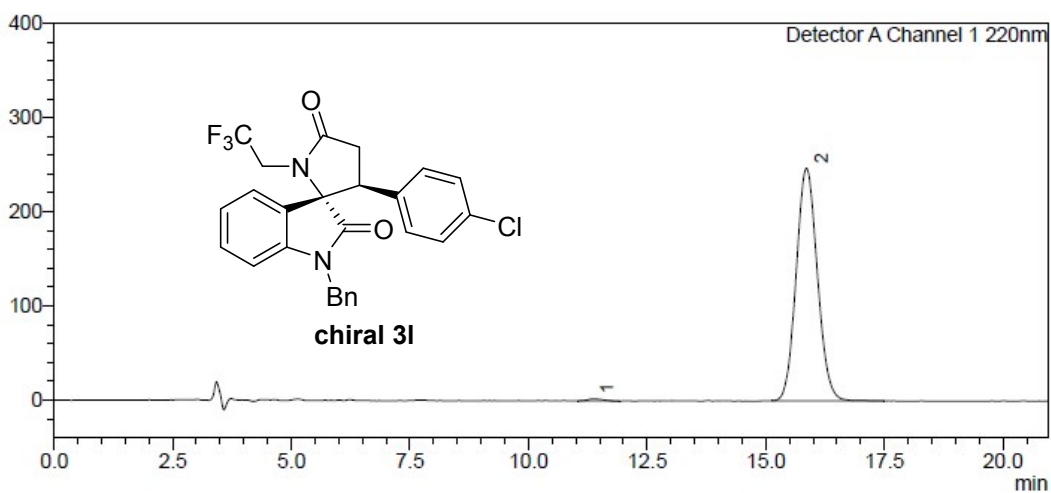

<Peak Table>

Detector A Channel 1 220nm

| Peak# | Ret. Time | Area    | Height | Conc.  | Area%   |
|-------|-----------|---------|--------|--------|---------|
| 1     | 11.338    | 50953   | 2220   | 0.660  | 0.660   |
| 2     | 15.857    | 7667700 | 247096 | 99.340 | 99.340  |
| Total |           | 7718654 | 249316 |        | 100.000 |

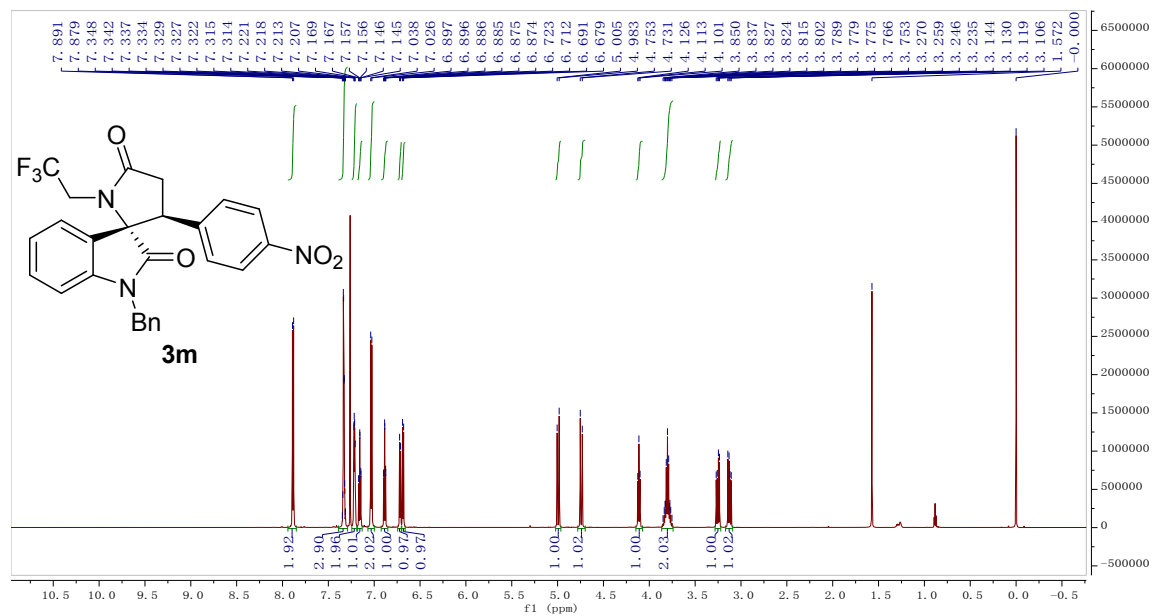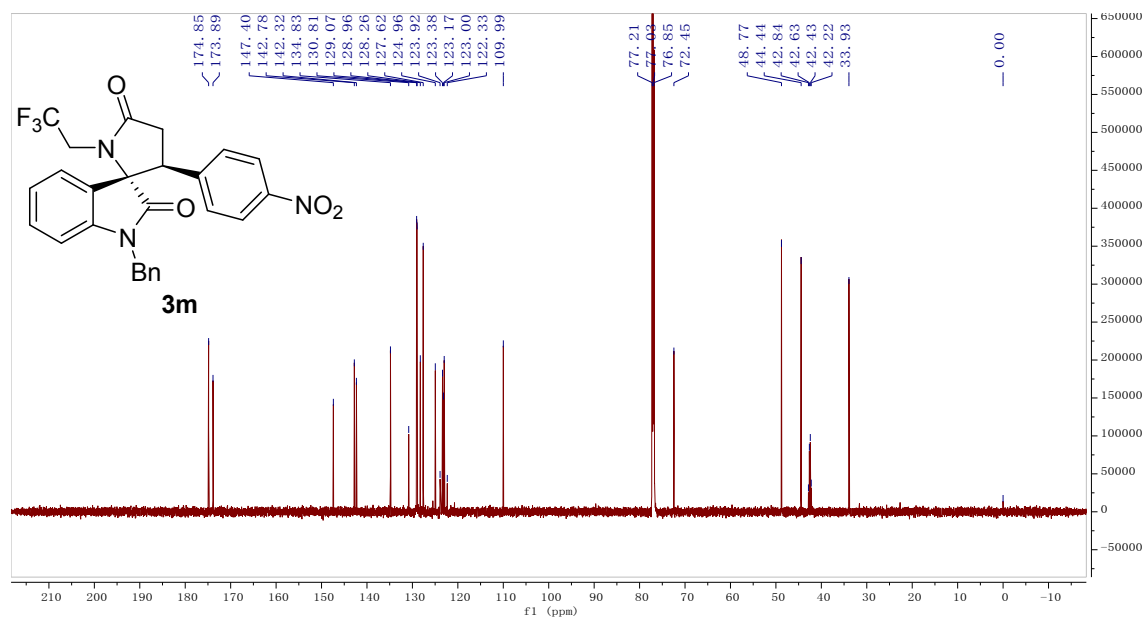

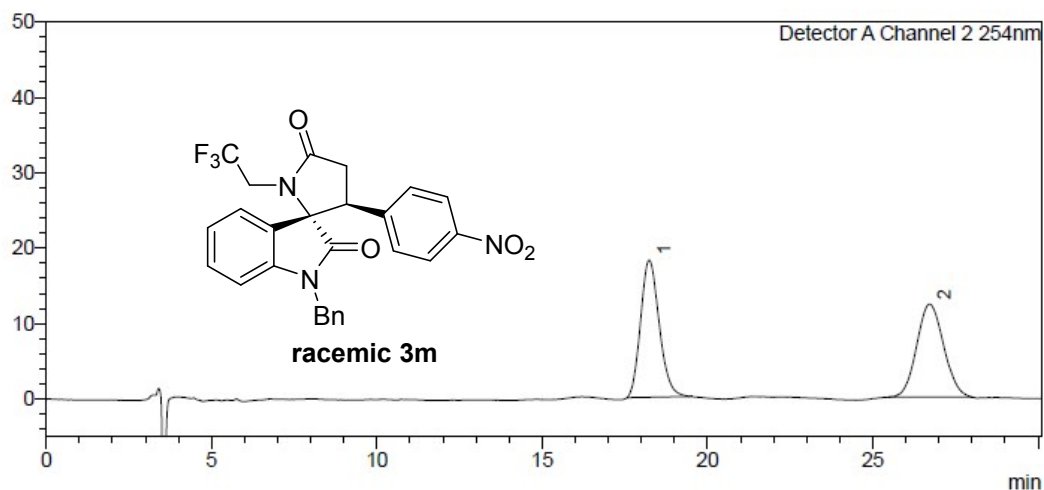

<Peak Table>

Detector A Channel 2 254nm

| Peak# | Ret. Time | Area    | Height | Conc.  | Area%   |
|-------|-----------|---------|--------|--------|---------|
| 1     | 18.239    | 713863  | 18183  | 50.537 | 50.537  |
| 2     | 26.716    | 698683  | 12332  | 49.463 | 49.463  |
| Total |           | 1412546 | 30515  |        | 100.000 |

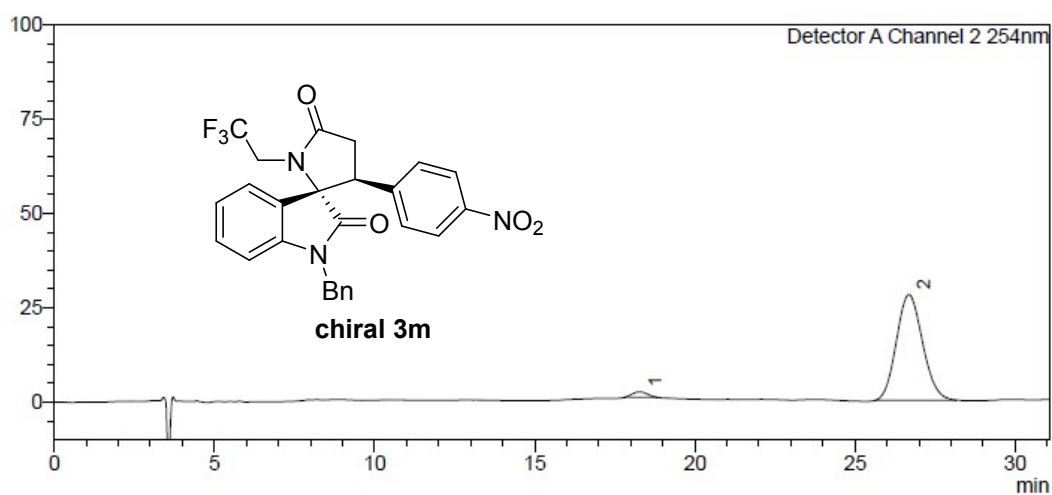

<Peak Table>

Detector A Channel 2 254nm

| Peak# | Ret. Time | Area    | Height | Conc.  | Area%   |
|-------|-----------|---------|--------|--------|---------|
| 1     | 18.288    | 43895   | 1383   | 2.693  | 2.693   |
| 2     | 26.678    | 1585998 | 27973  | 97.307 | 97.307  |
| Total |           | 1629893 | 29356  |        | 100.000 |



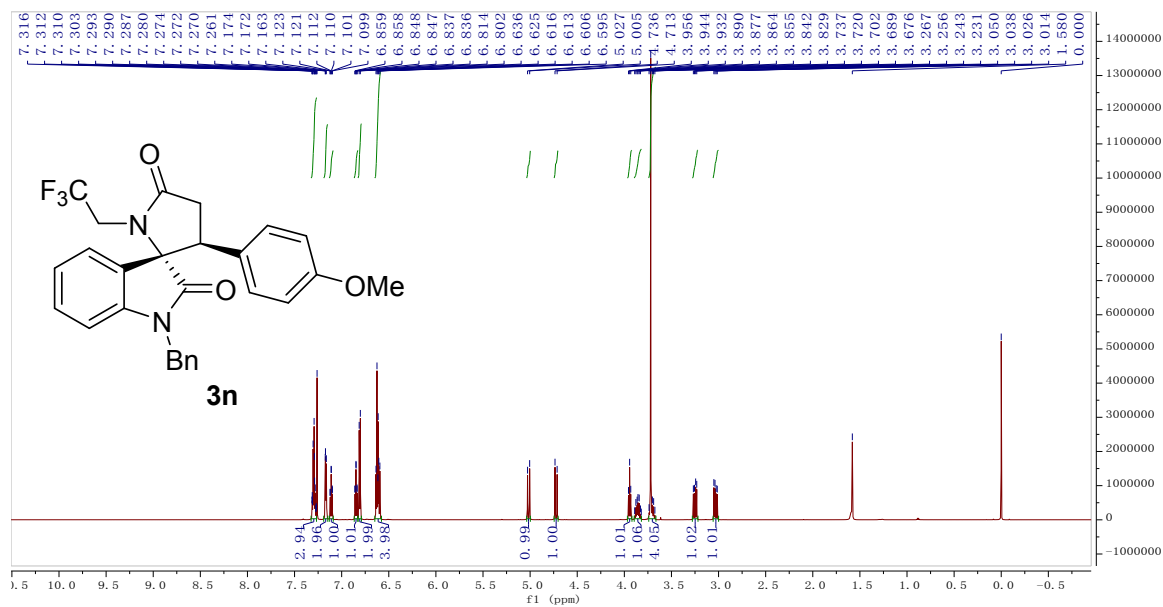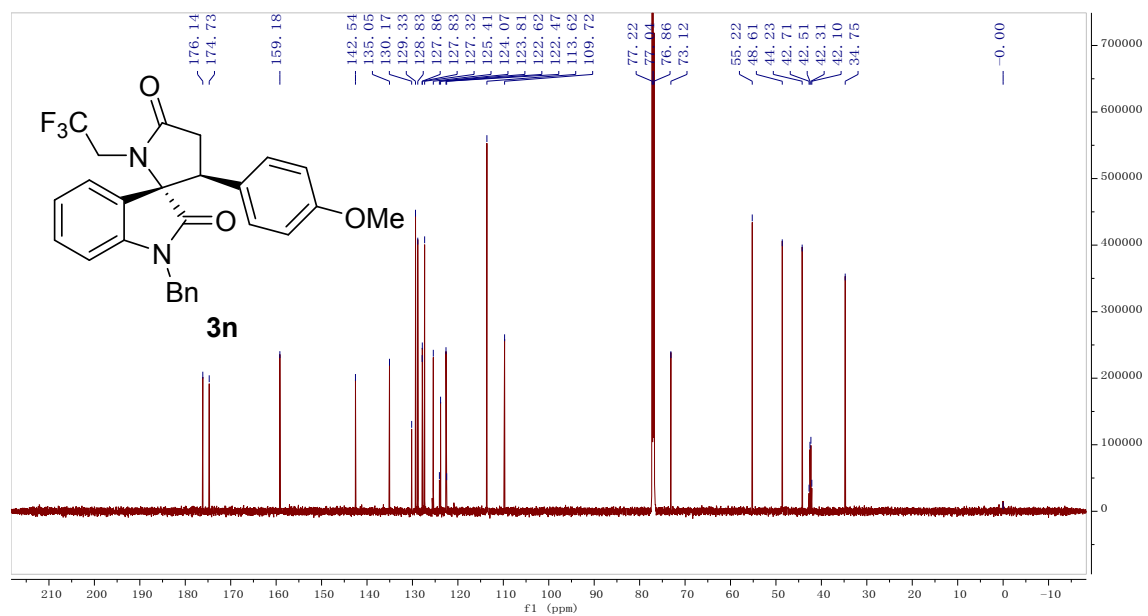

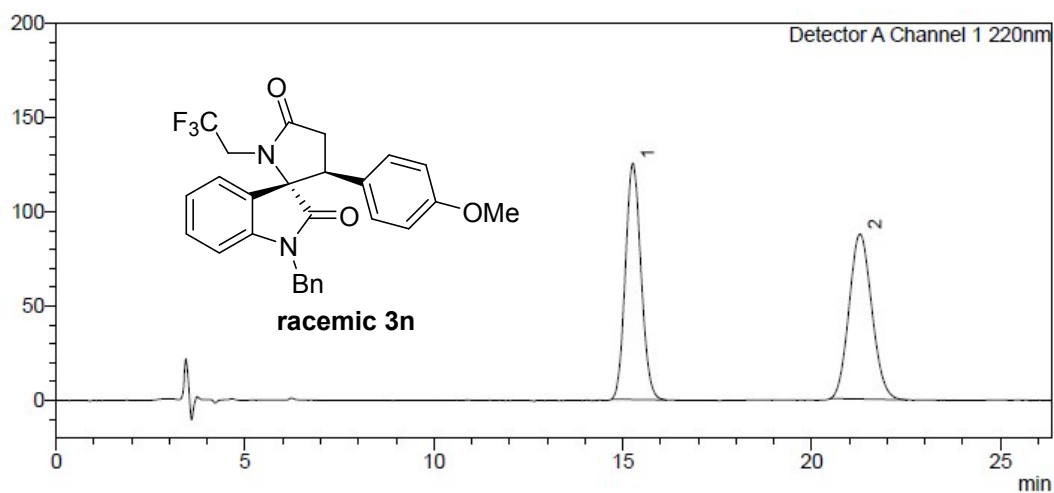

<Peak Table>

Detector A Channel 1 220nm

| Peak# | Ret. Time | Area    | Height | Conc.  | Area%   |
|-------|-----------|---------|--------|--------|---------|
| 1     | 15.268    | 3599229 | 125383 | 49.559 | 49.559  |
| 2     | 21.280    | 3663275 | 87588  | 50.441 | 50.441  |
| Total |           | 7262503 | 212971 |        | 100.000 |

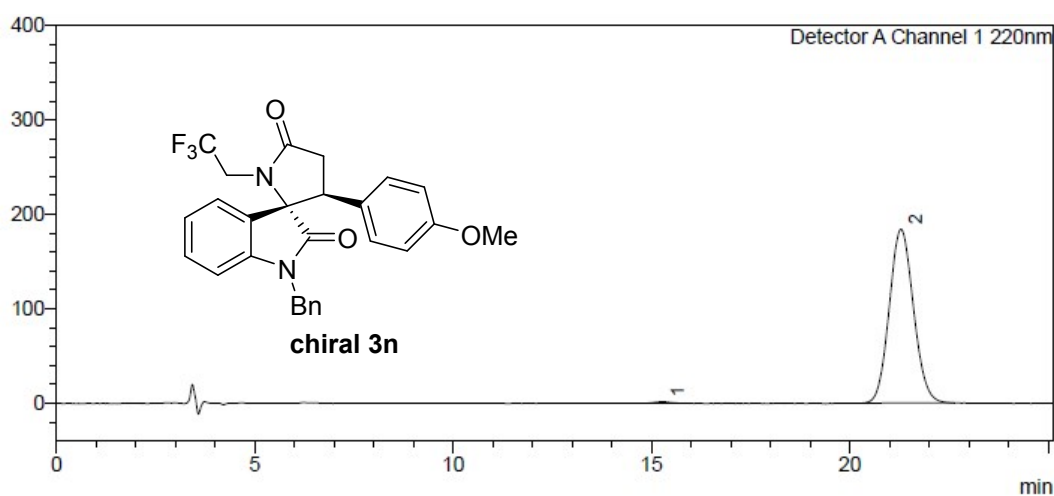

<Peak Table>

Detector A Channel 1 220nm

| Peak# | Ret. Time | Area    | Height | Conc.  | Area%   |
|-------|-----------|---------|--------|--------|---------|
| 1     | 15.291    | 38613   | 1478   | 0.493  | 0.493   |
| 2     | 21.292    | 7795744 | 184013 | 99.507 | 99.507  |
| Total |           | 7834357 | 185491 |        | 100.000 |

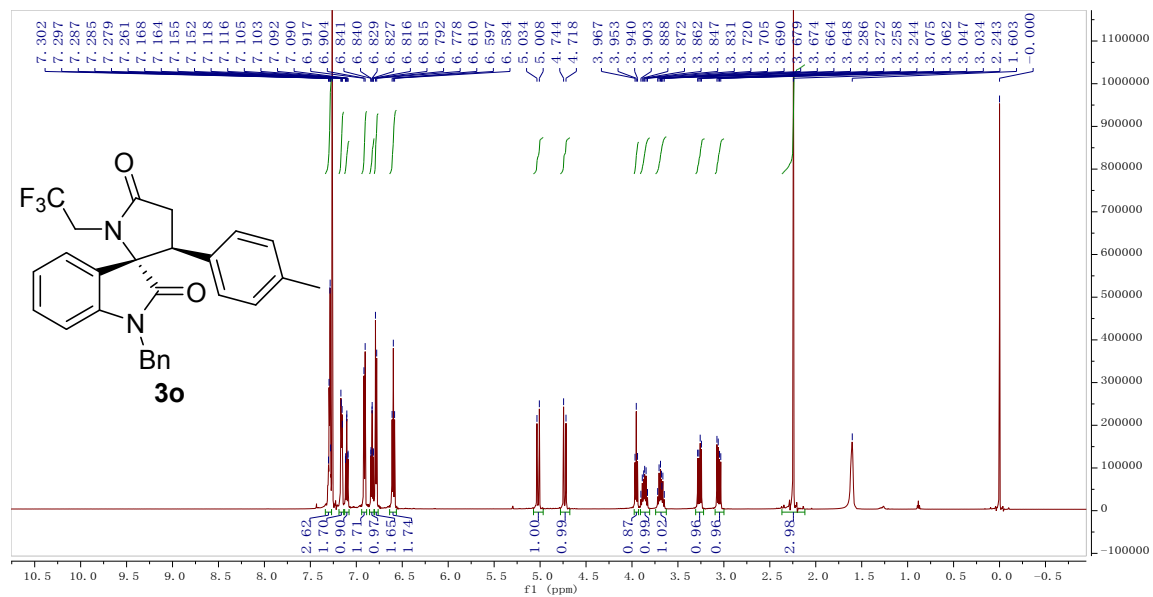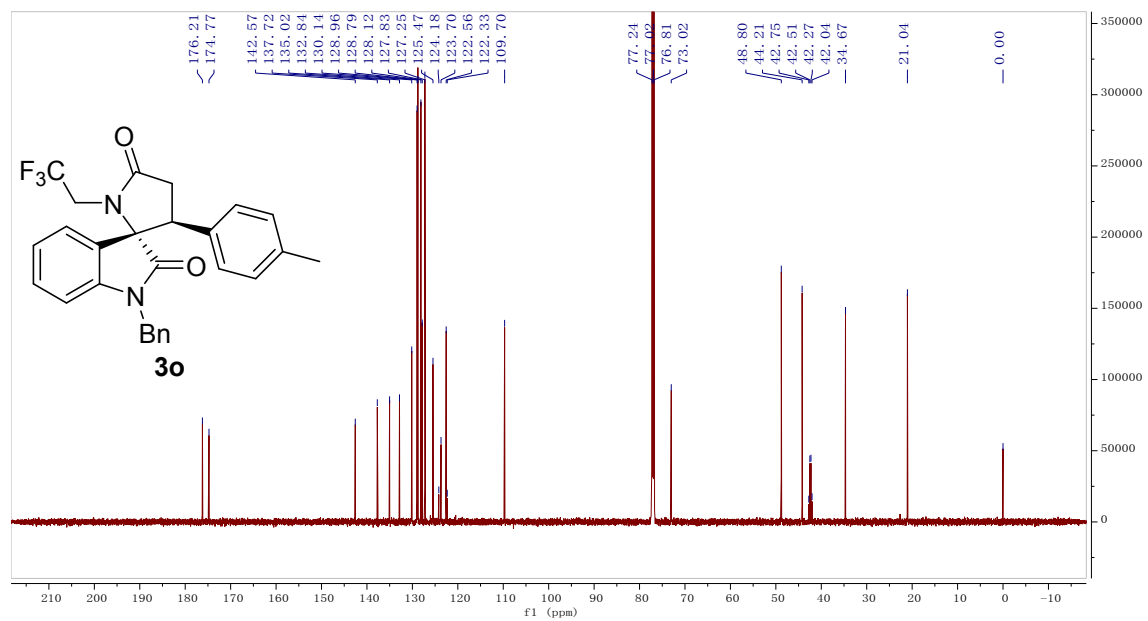

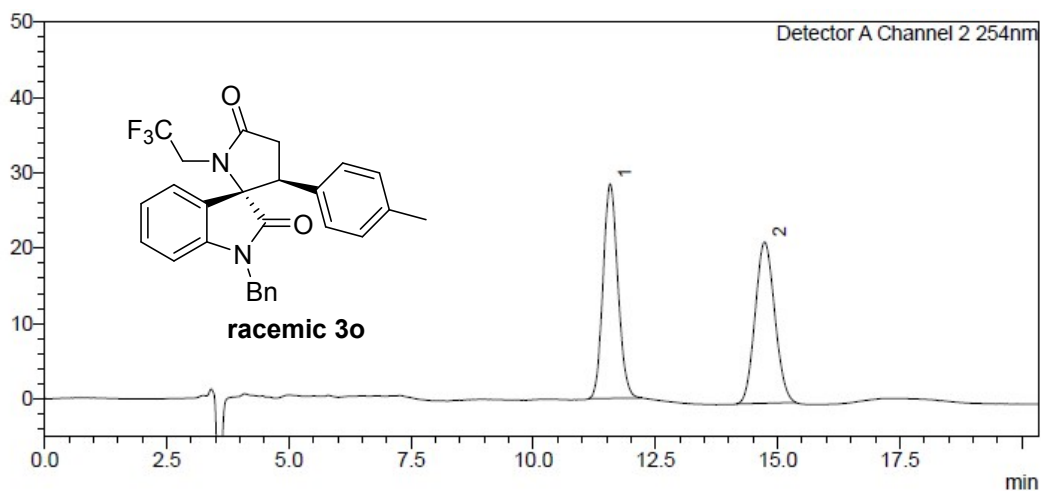

**<Peak Table>**

Detector A Channel 2 254nm

| Peak# | Ret. Time | Area    | Height | Conc.  | Area%   |
|-------|-----------|---------|--------|--------|---------|
| 1     | 11.574    | 598122  | 28446  | 50.057 | 50.057  |
| 2     | 14.735    | 596752  | 21387  | 49.943 | 49.943  |
| Total |           | 1194874 | 49834  |        | 100.000 |

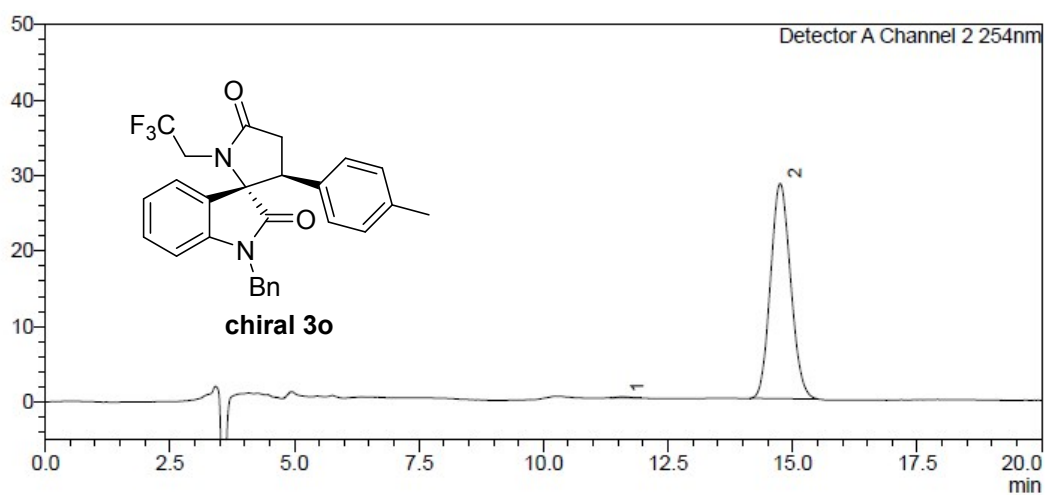

**<Peak Table>**

Detector A Channel 2 254nm

| Peak# | Ret. Time | Area   | Height | Conc.  | Area%   |
|-------|-----------|--------|--------|--------|---------|
| 1     | 11.577    | 2558   | 138    | 0.319  | 0.319   |
| 2     | 14.751    | 799658 | 28505  | 99.681 | 99.681  |
| Total |           | 802215 | 28643  |        | 100.000 |

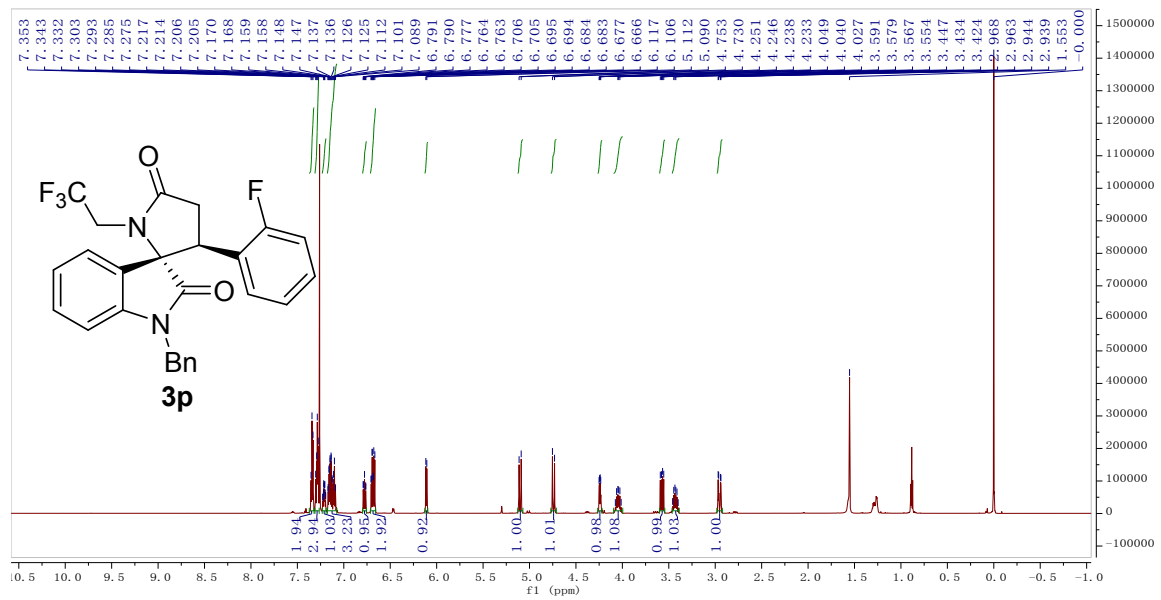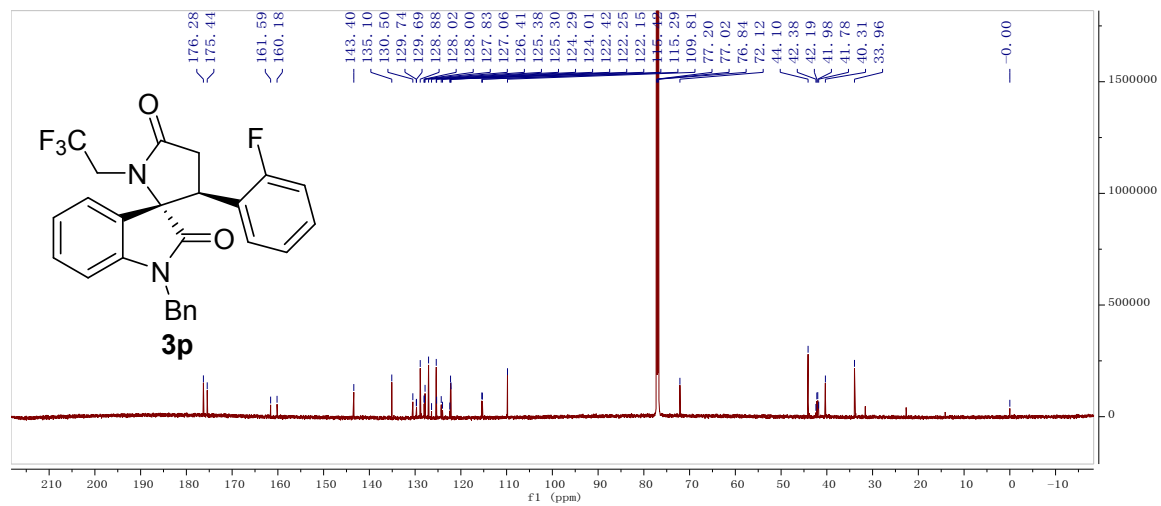

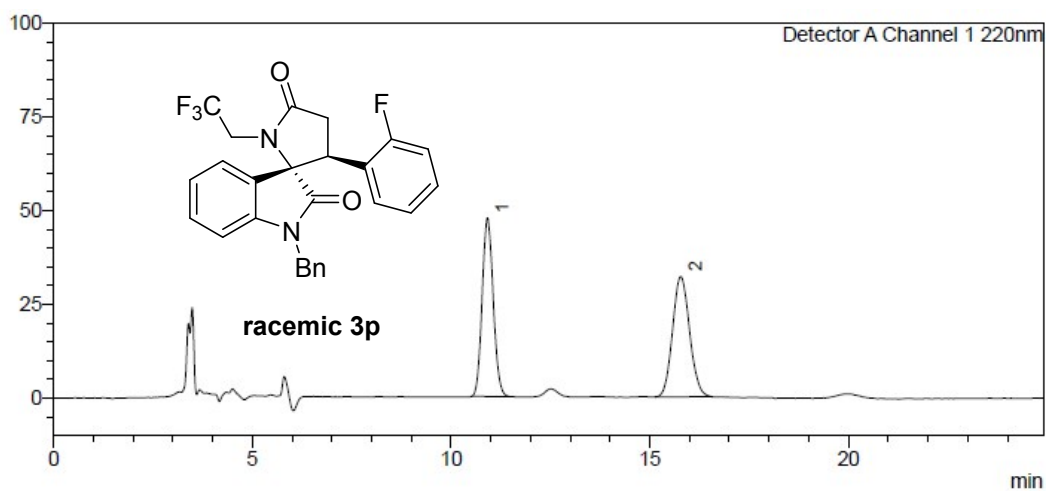

<Peak Table>

Detector A Channel 1 220nm

| Peak# | Ret. Time | Area    | Height | Conc.  | Area%   |
|-------|-----------|---------|--------|--------|---------|
| 1     | 10.916    | 925223  | 47686  | 49.183 | 49.183  |
| 2     | 15.779    | 955956  | 32098  | 50.817 | 50.817  |
| Total |           | 1881179 | 79785  |        | 100.000 |

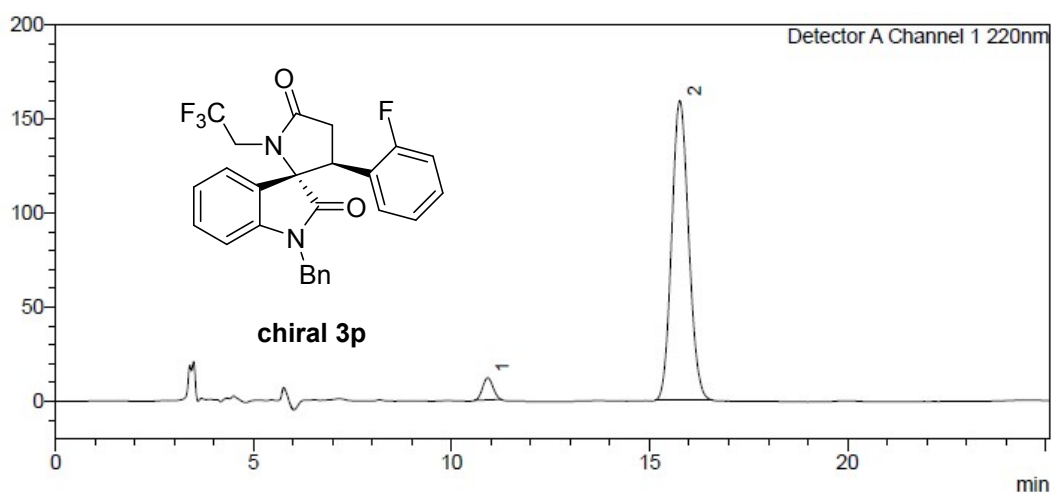

<Peak Table>

Detector A Channel 1 220nm

| Peak# | Ret. Time | Area    | Height | Conc.  | Area%   |
|-------|-----------|---------|--------|--------|---------|
| 1     | 10.915    | 213084  | 11709  | 4.301  | 4.301   |
| 2     | 15.765    | 4741611 | 159220 | 95.699 | 95.699  |
| Total |           | 4954695 | 170929 |        | 100.000 |

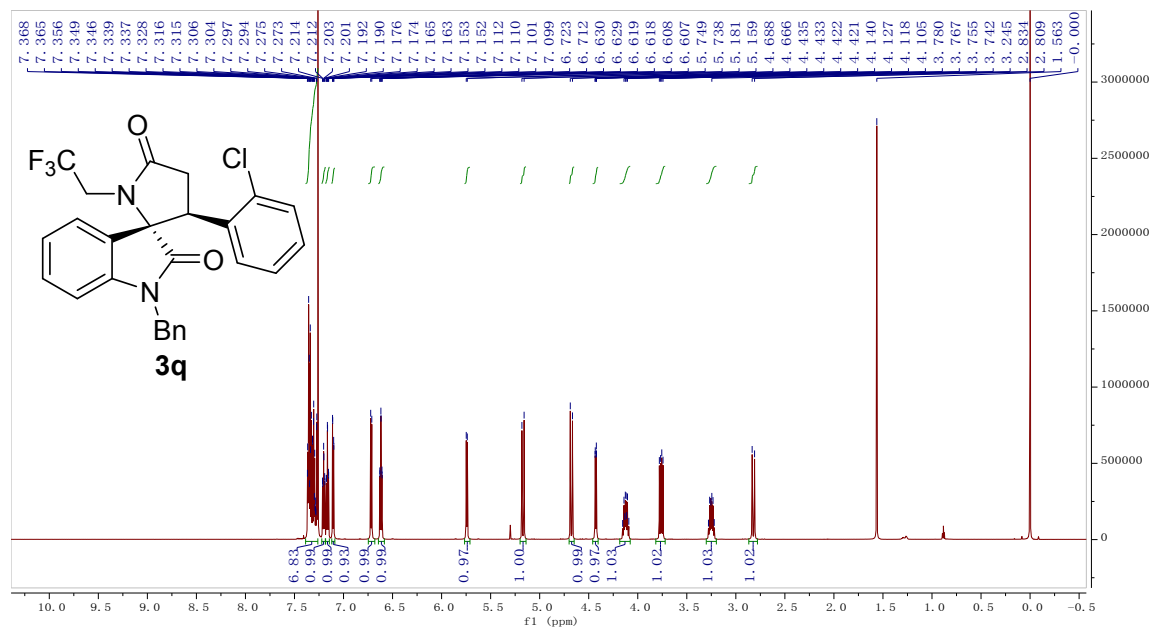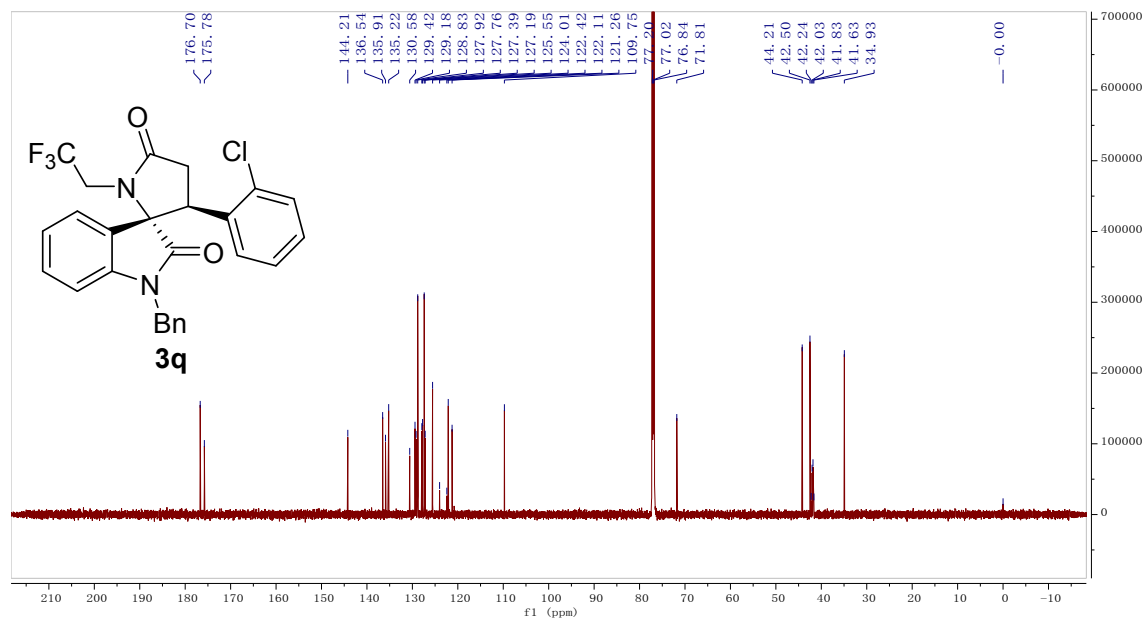

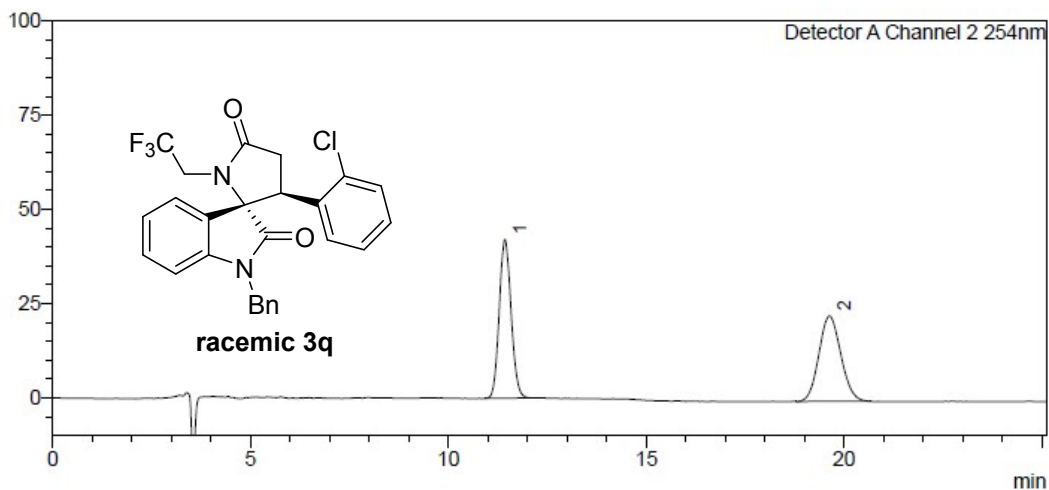

<Peak Table>

Detector A Channel 2 254nm

| Peak# | Ret. Time | Area    | Height | Conc.  | Area%   |
|-------|-----------|---------|--------|--------|---------|
| 1     | 11.431    | 879504  | 42118  | 50.191 | 50.191  |
| 2     | 19.631    | 872804  | 22696  | 49.809 | 49.809  |
| Total |           | 1752308 | 64815  |        | 100.000 |

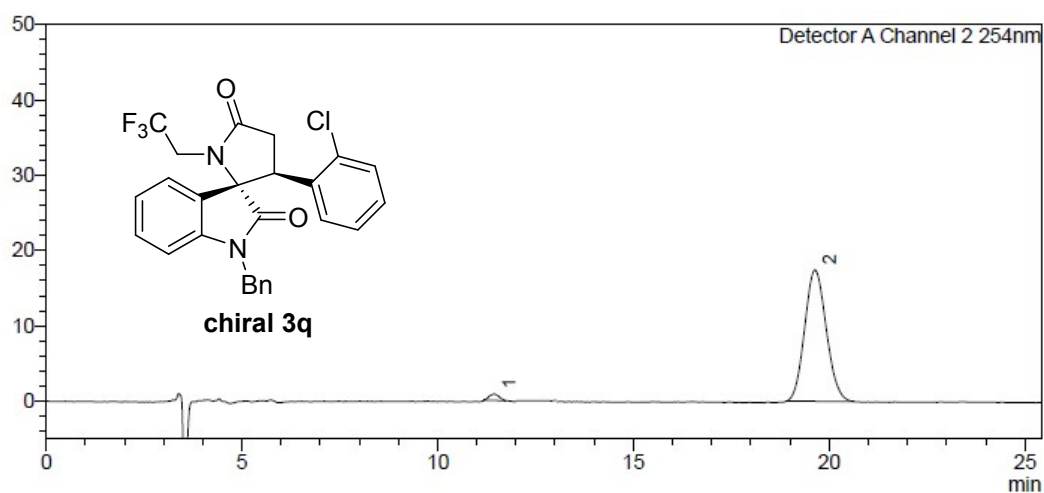

<Peak Table>

Detector A Channel 2 254nm

| Peak# | Ret. Time | Area   | Height | Conc.  | Area%   |
|-------|-----------|--------|--------|--------|---------|
| 1     | 11.445    | 14908  | 843    | 2.180  | 2.180   |
| 2     | 19.639    | 668826 | 17438  | 97.820 | 97.820  |
| Total |           | 683734 | 18281  |        | 100.000 |



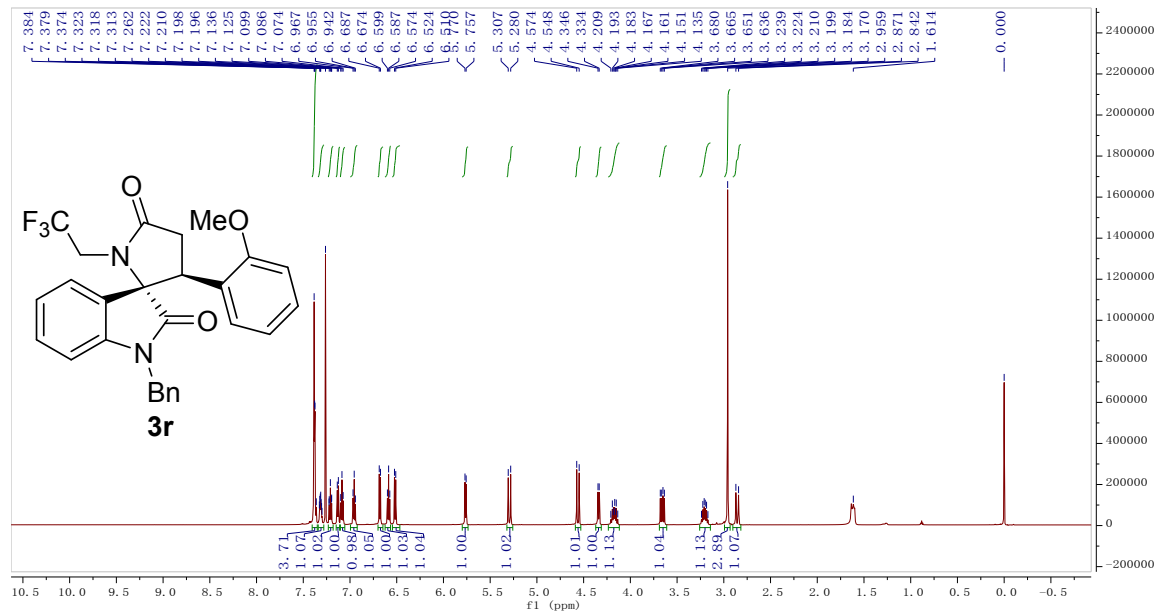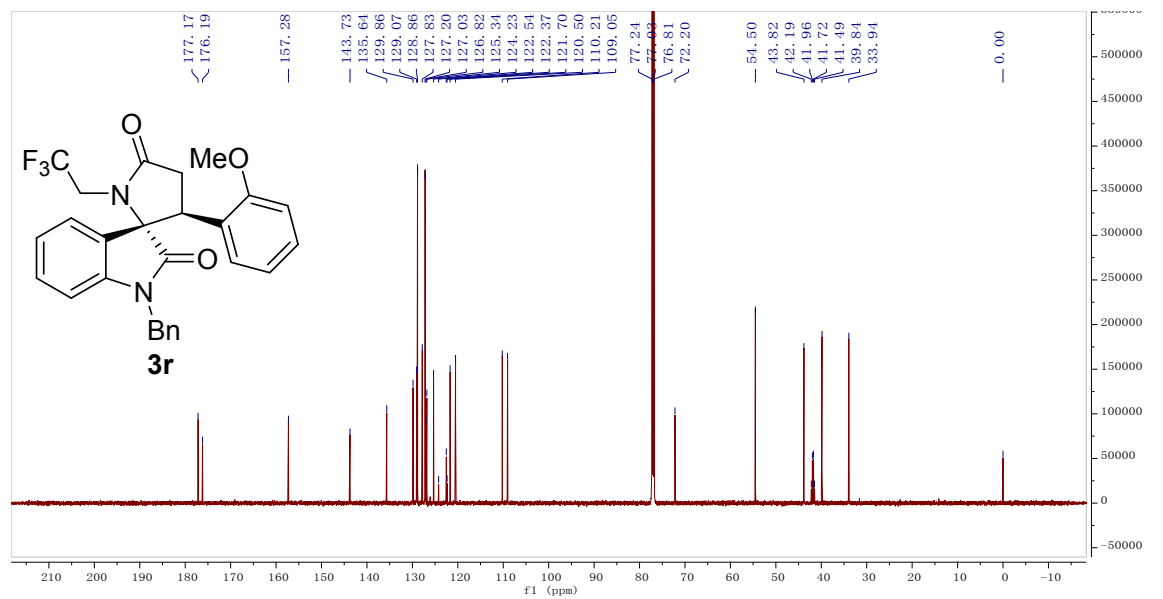

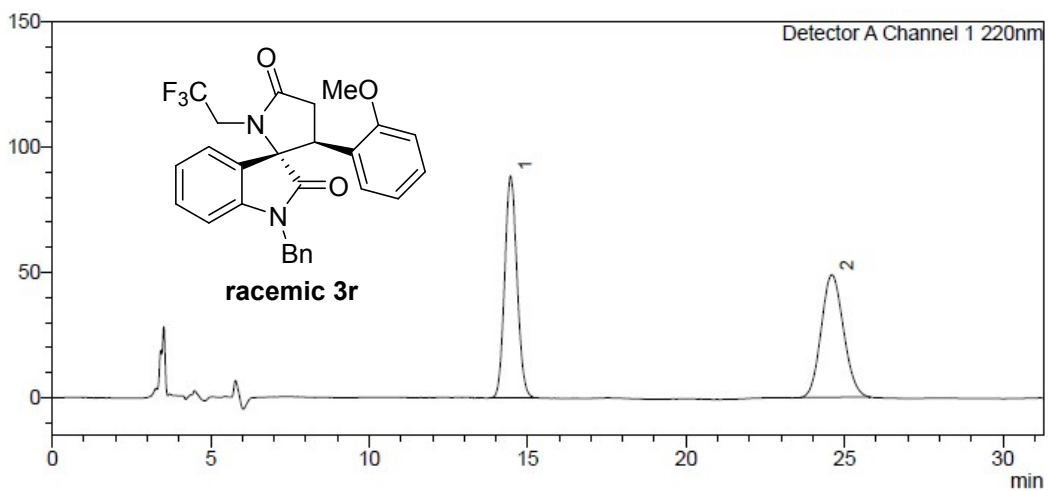

**<Peak Table>**

Detector A Channel 1 220nm

| Peak# | Ret. Time | Area    | Height | Conc.  | Area%   |
|-------|-----------|---------|--------|--------|---------|
| 1     | 14.467    | 2388321 | 88535  | 49.946 | 49.946  |
| 2     | 24.607    | 2393464 | 48852  | 50.054 | 50.054  |
| Total |           | 4781785 | 137387 |        | 100.000 |

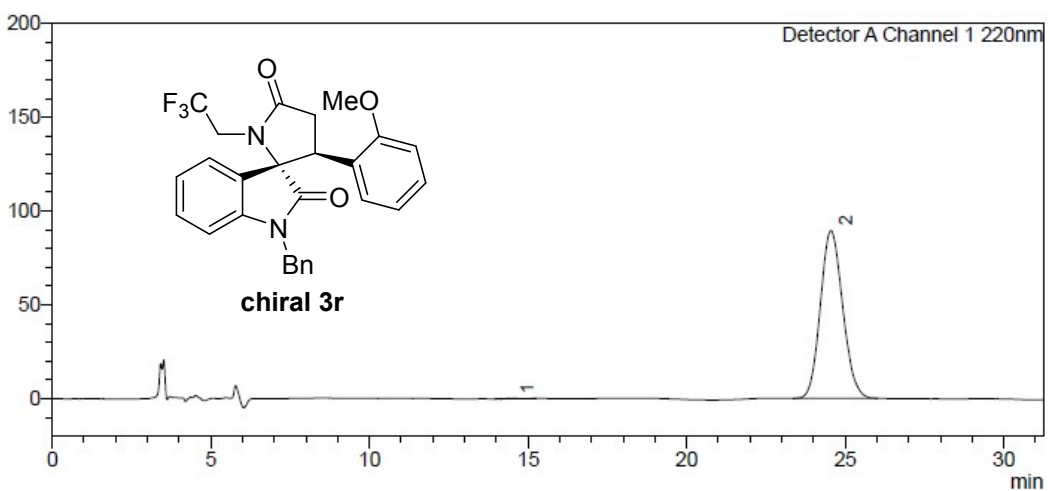

**<Peak Table>**

Detector A Channel 1 220nm

| Peak# | Ret. Time | Area    | Height | Conc.  | Area%   |
|-------|-----------|---------|--------|--------|---------|
| 1     | 14.510    | 6280    | 239    | 0.144  | 0.144   |
| 2     | 24.550    | 4364780 | 89284  | 99.856 | 99.856  |
| Total |           | 4371060 | 89522  |        | 100.000 |

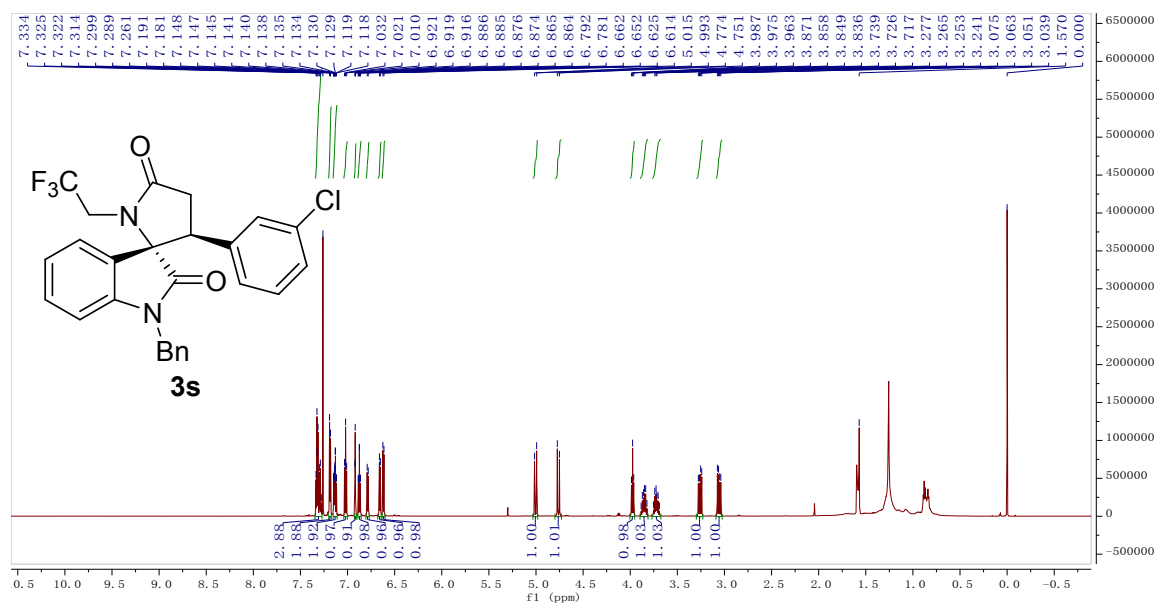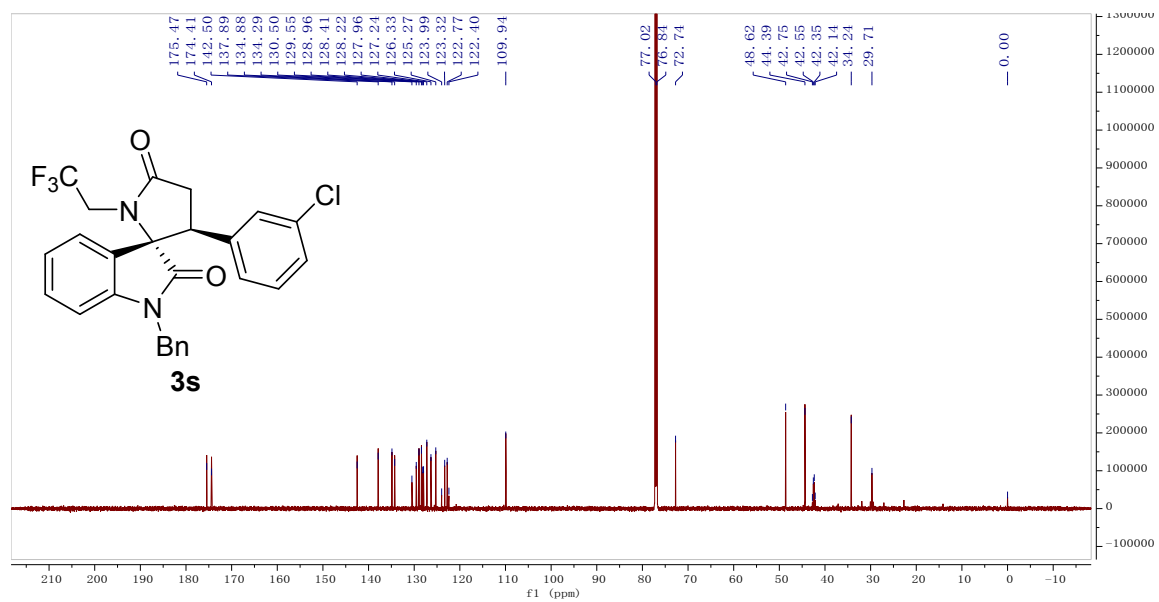

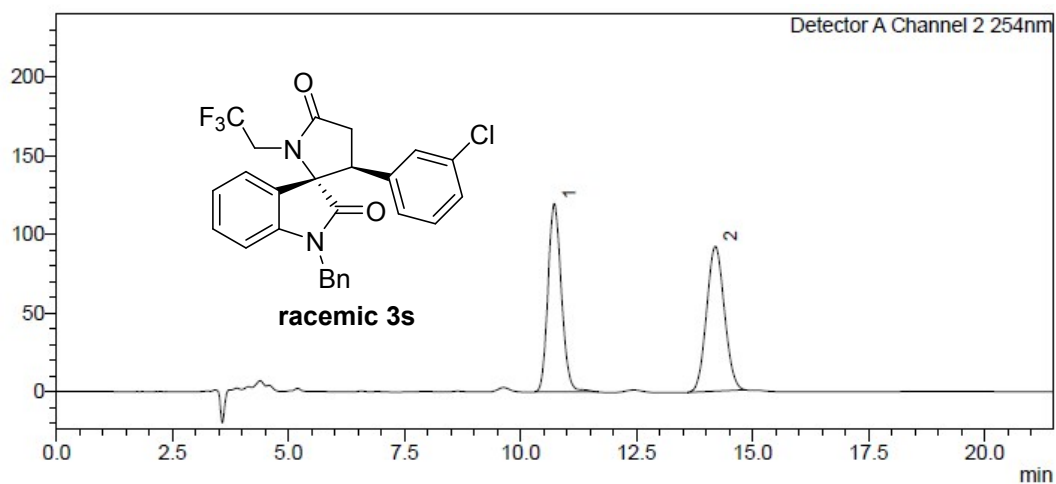

**<Peak Table>**

Detector A Channel 2 254nm

| Peak# | Ret. Time | Area    | Height | Conc.  | Area%   |
|-------|-----------|---------|--------|--------|---------|
| 1     | 10.728    | 2411379 | 119713 | 49.488 | 49.488  |
| 2     | 14.199    | 2461260 | 92070  | 50.512 | 50.512  |
| Total |           | 4872639 | 211783 |        | 100.000 |

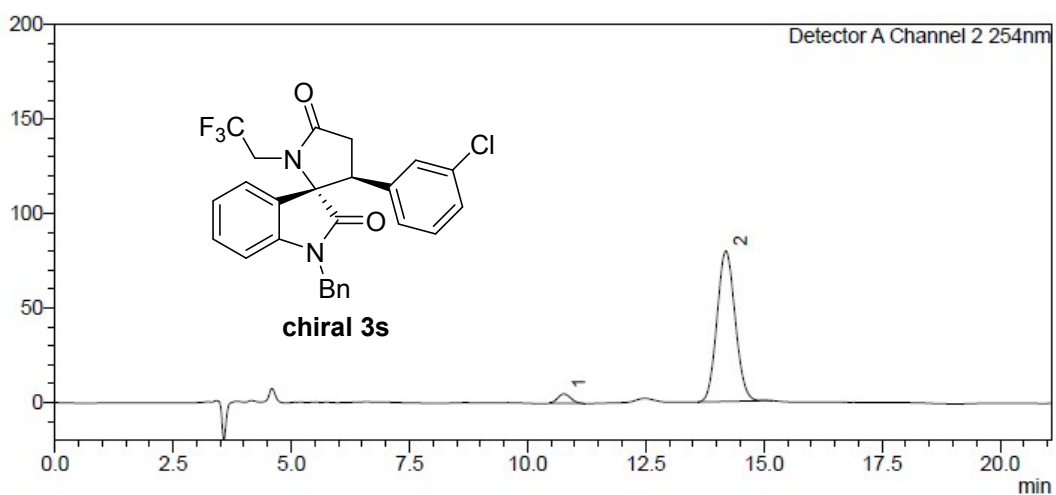

**<Peak Table>**

Detector A Channel 2 254nm

| Peak# | Ret. Time | Area    | Height | Conc.  | Area%   |
|-------|-----------|---------|--------|--------|---------|
| 1     | 10.768    | 91288   | 4893   | 4.103  | 4.103   |
| 2     | 14.194    | 2133865 | 79689  | 95.897 | 95.897  |
| Total |           | 2225153 | 84581  |        | 100.000 |

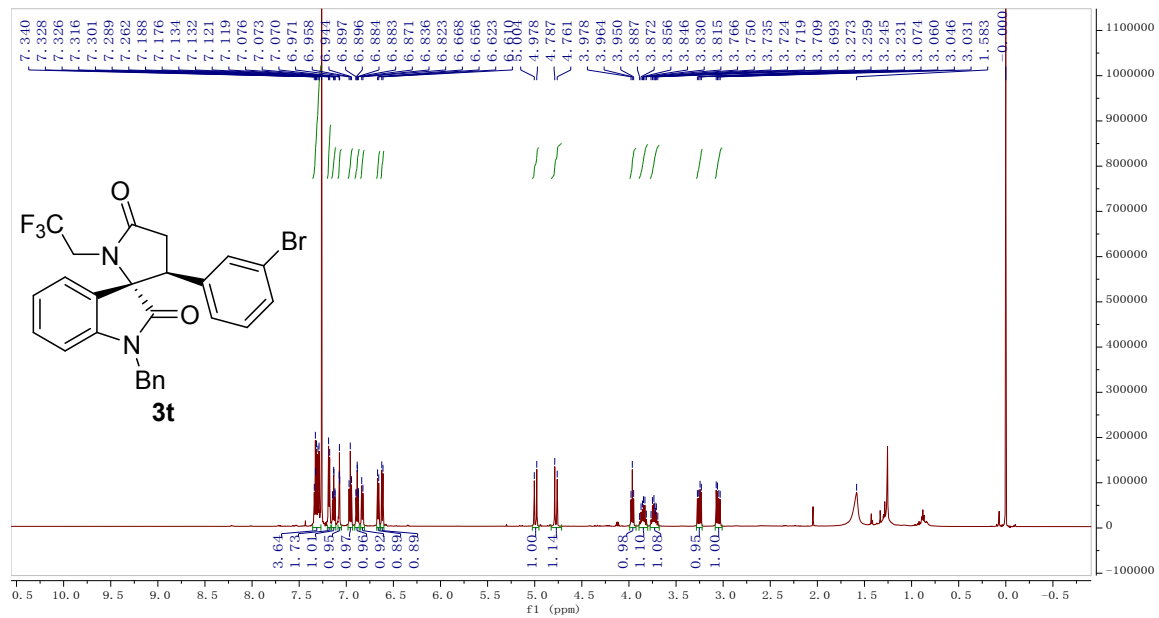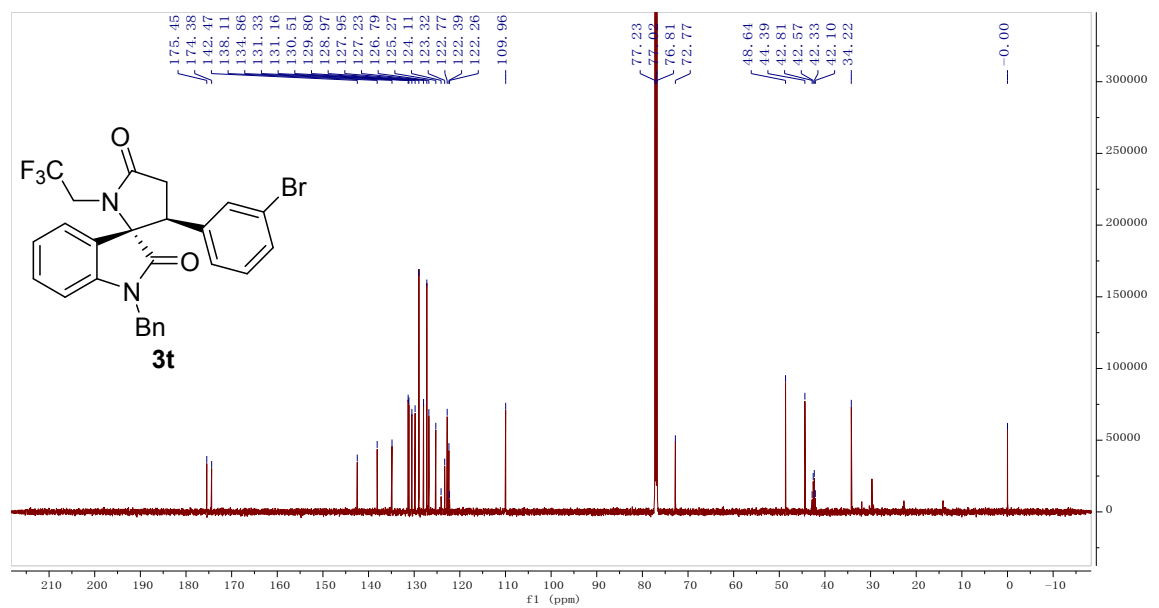

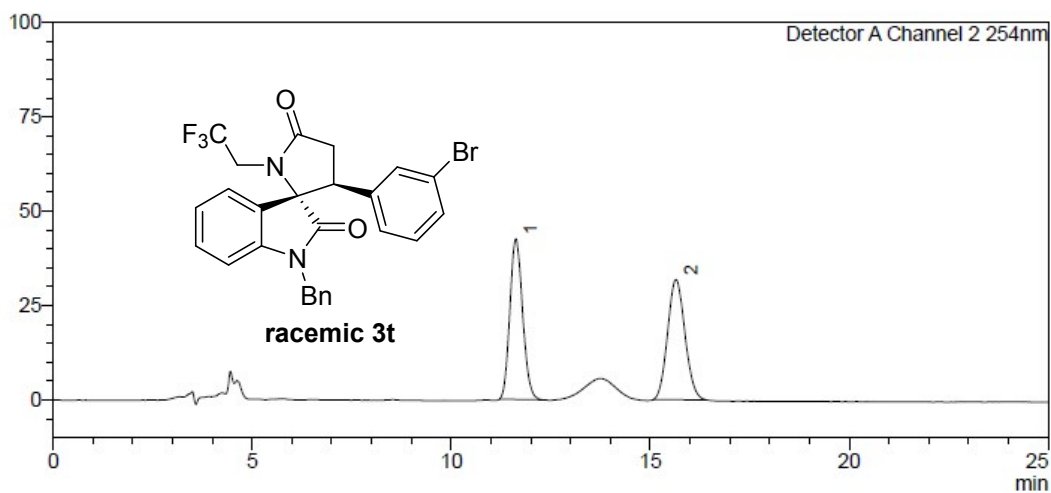

**<Peak Table>**

Detector A Channel 2 254nm

| Peak# | Ret. Time | Area    | Height | Conc.  | Area%   |
|-------|-----------|---------|--------|--------|---------|
| 1     | 11.625    | 948078  | 42527  | 49.545 | 49.545  |
| 2     | 15.649    | 965479  | 31817  | 50.455 | 50.455  |
| Total |           | 1913557 | 74345  |        | 100.000 |

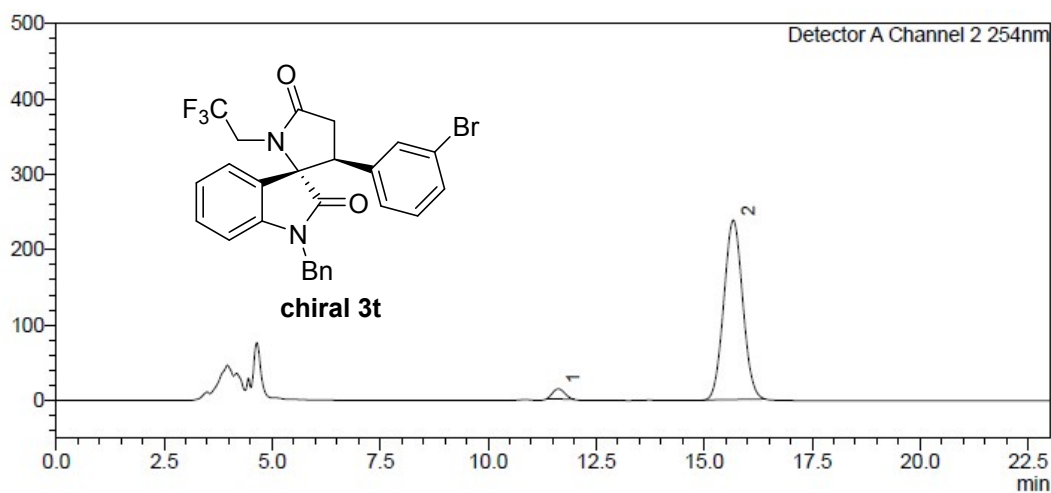

**<Peak Table>**

Detector A Channel 2 254nm

| Peak# | Ret. Time | Area    | Height | Conc.  | Area%   |
|-------|-----------|---------|--------|--------|---------|
| 1     | 11.627    | 257193  | 13409  | 3.436  | 3.436   |
| 2     | 15.677    | 7228092 | 237903 | 96.564 | 96.564  |
| Total |           | 7485285 | 251312 |        | 100.000 |

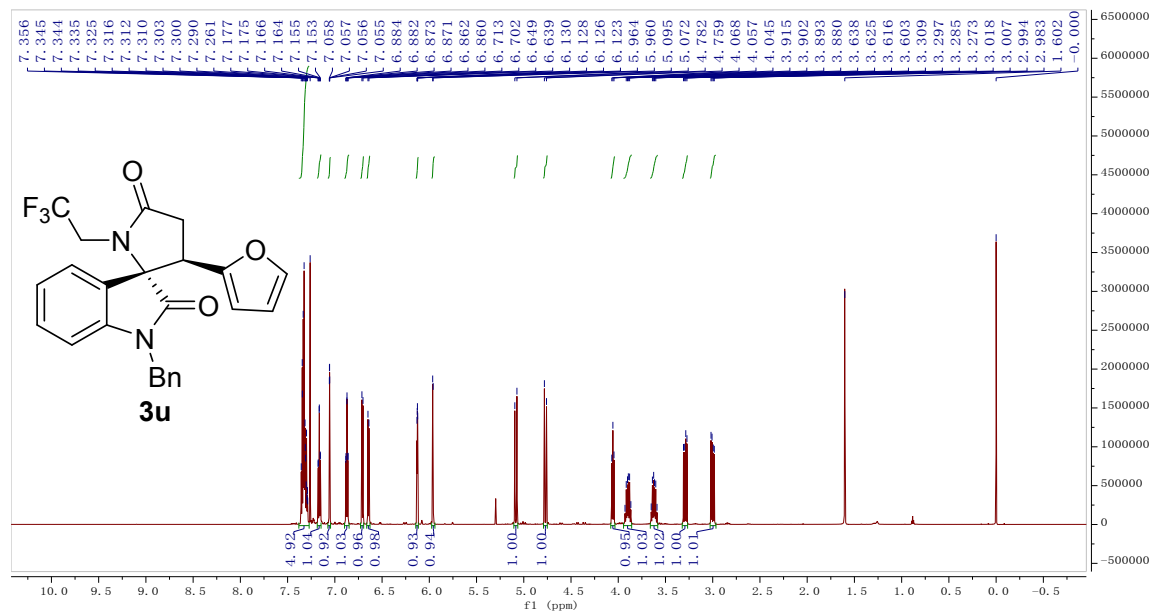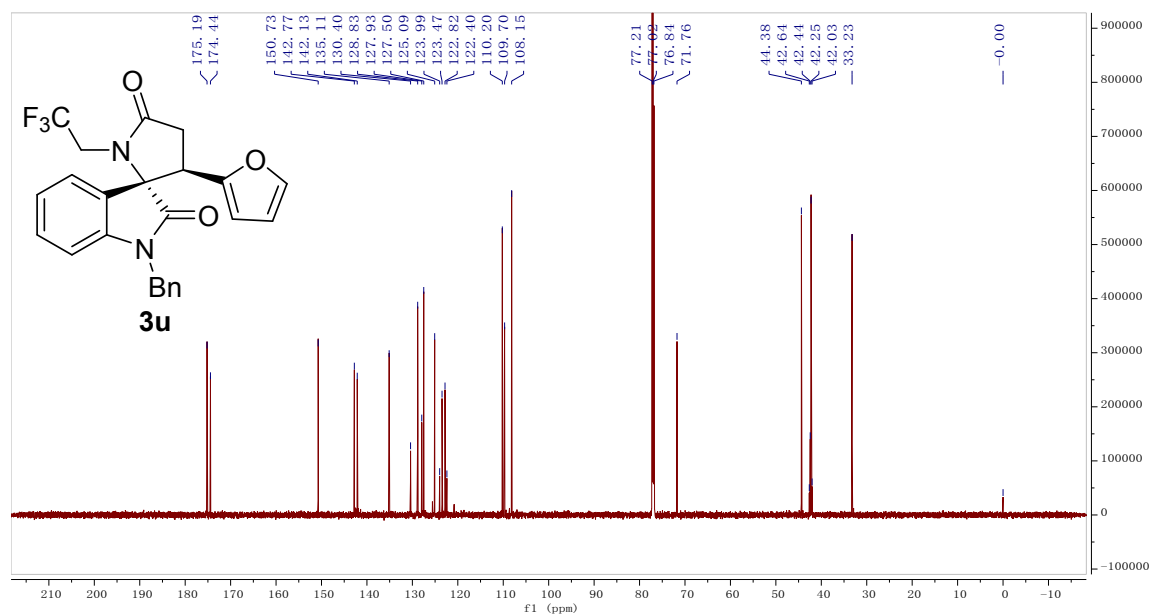

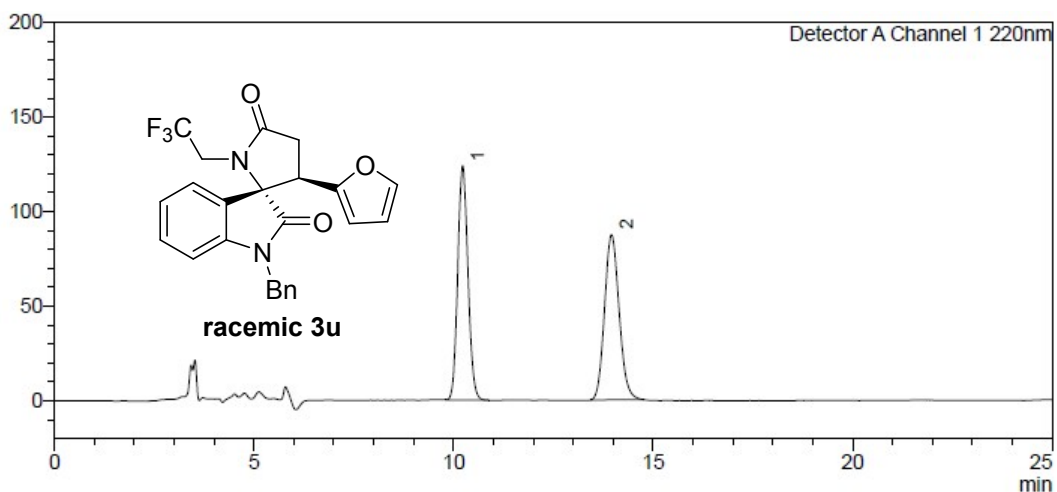

<Peak Table>

Detector A Channel 1 220nm

| Peak# | Ret. Time | Area    | Height | Conc.  | Area%   |
|-------|-----------|---------|--------|--------|---------|
| 1     | 10.227    | 2206598 | 123754 | 49.920 | 49.920  |
| 2     | 13.957    | 2213702 | 87307  | 50.080 | 50.080  |
| Total |           | 4420299 | 211060 |        | 100.000 |

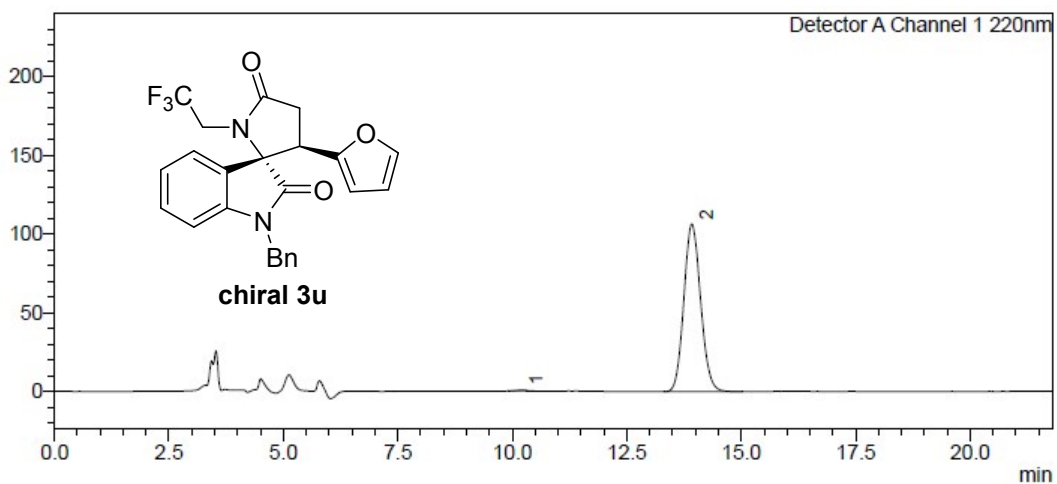

<Peak Table>

Detector A Channel 1 220nm

| Peak# | Ret. Time | Area    | Height | Conc.  | Area%   |
|-------|-----------|---------|--------|--------|---------|
| 1     | 10.194    | 10931   | 688    | 0.400  | 0.400   |
| 2     | 13.923    | 2719610 | 106517 | 99.600 | 99.600  |
| Total |           | 2730541 | 107205 |        | 100.000 |



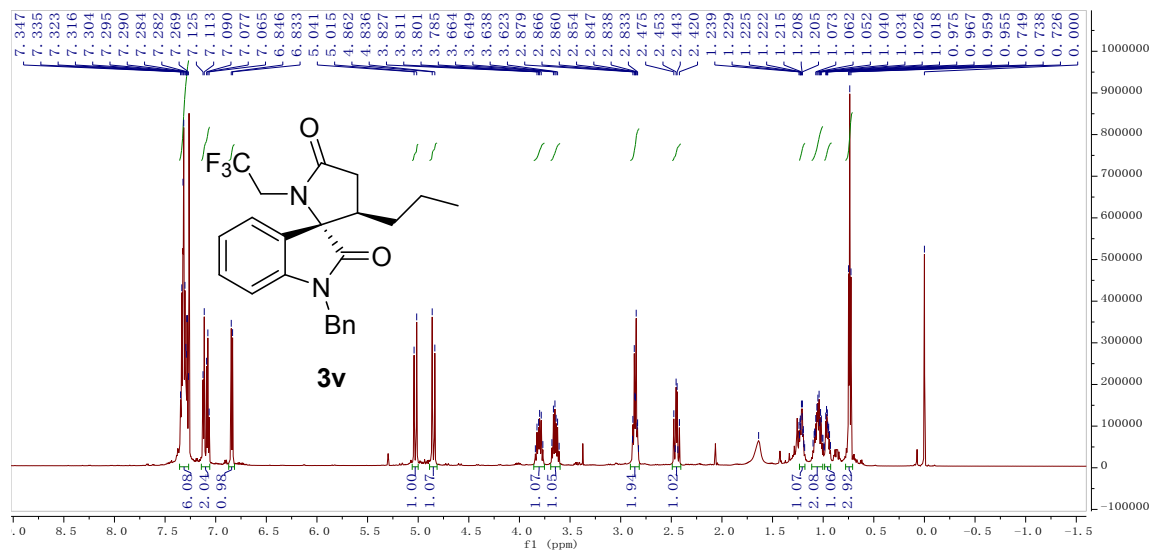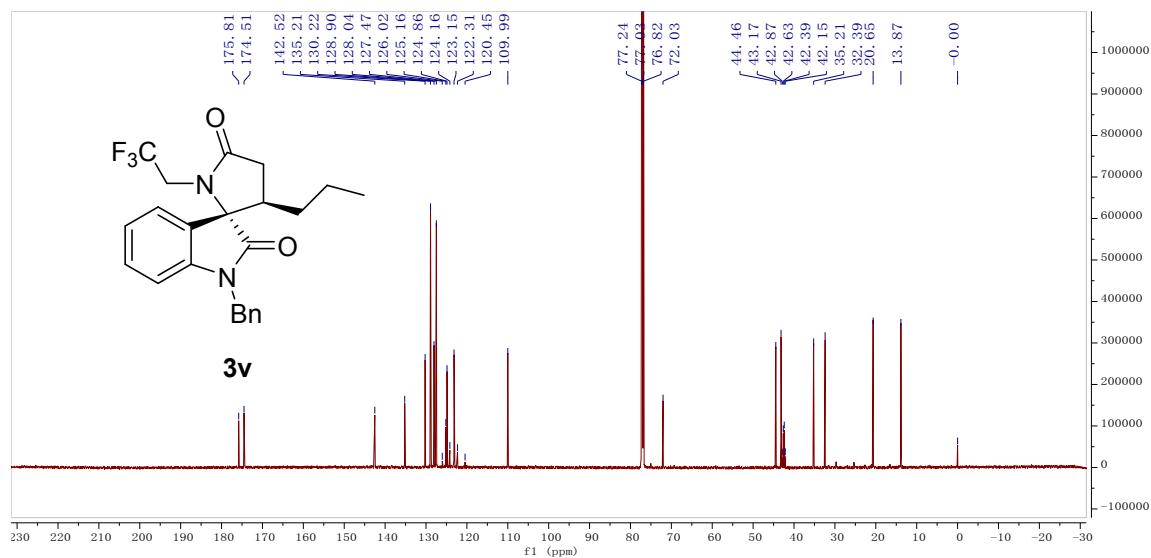

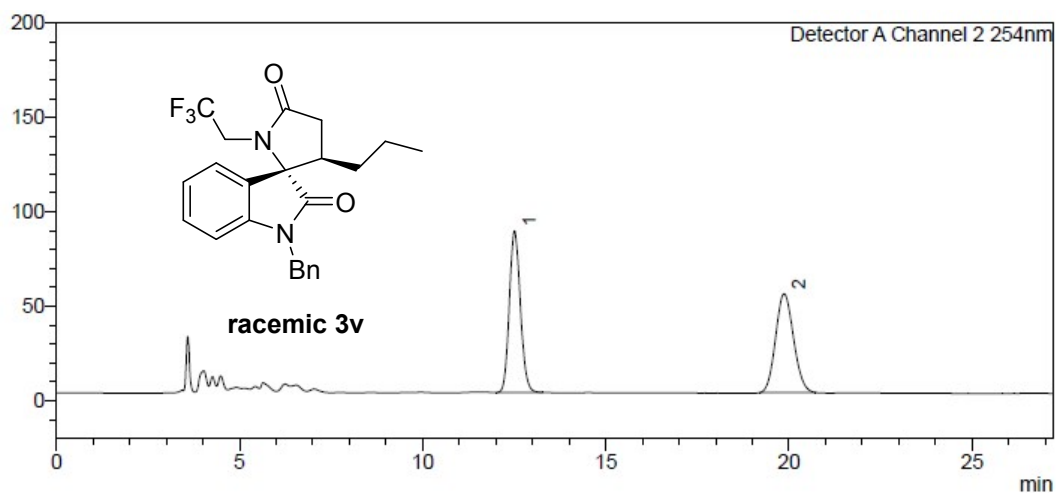

<Peak Table>

Detector A Channel 2 254nm

| Peak# | Ret. Time | Area    | Height | Conc.  | Area%   |
|-------|-----------|---------|--------|--------|---------|
| 1     | 12.509    | 1794200 | 85571  | 50.184 | 50.184  |
| 2     | 19.869    | 1781028 | 52336  | 49.816 | 49.816  |
| Total |           | 3575228 | 137907 |        | 100.000 |

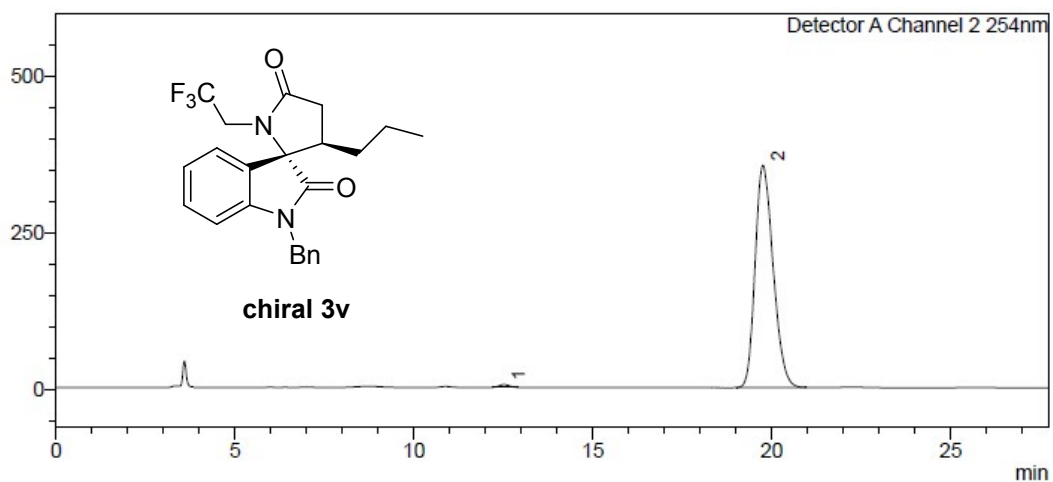

<Peak Table>

Detector A Channel 2 254nm

| Peak# | Ret. Time | Area     | Height | Conc.  | Area%   |
|-------|-----------|----------|--------|--------|---------|
| 1     | 12.520    | 86004    | 4390   | 0.688  | 0.688   |
| 2     | 19.756    | 12423333 | 354688 | 99.312 | 99.312  |
| Total |           | 12509337 | 359078 |        | 100.000 |

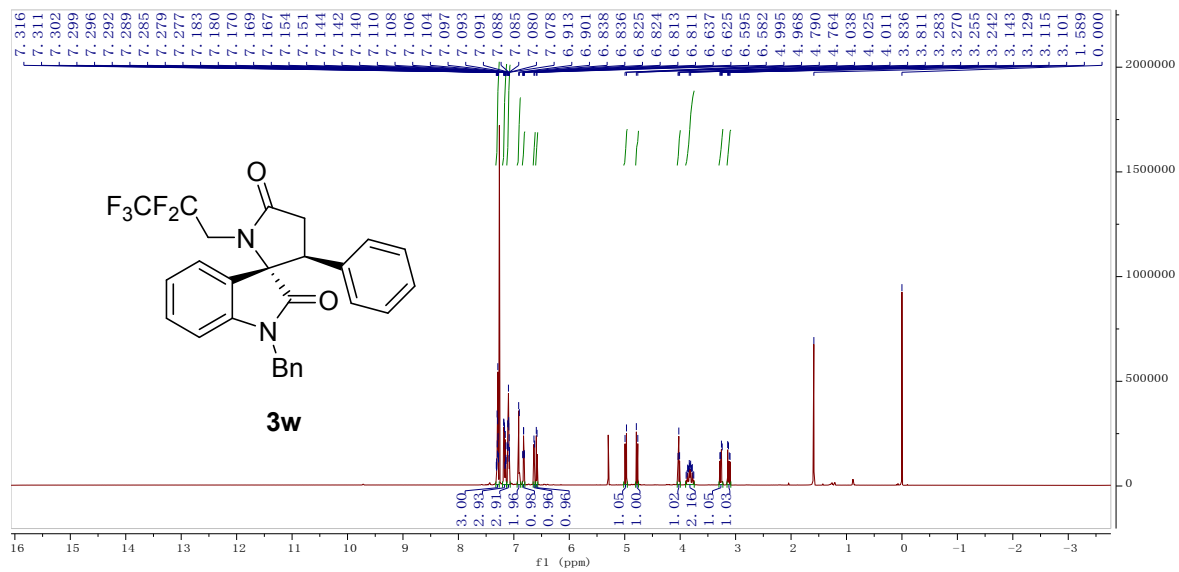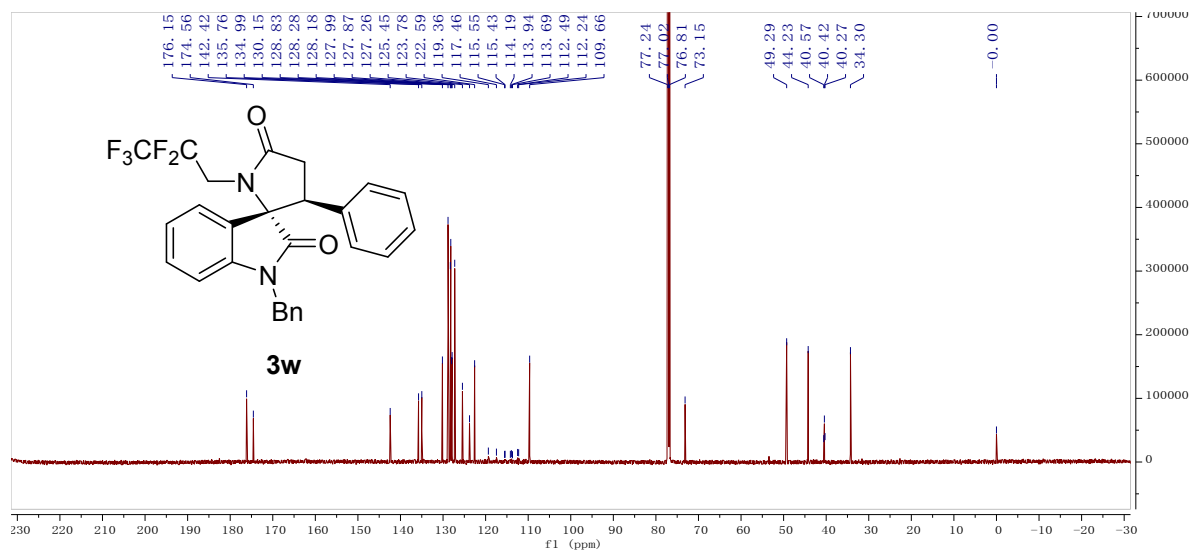

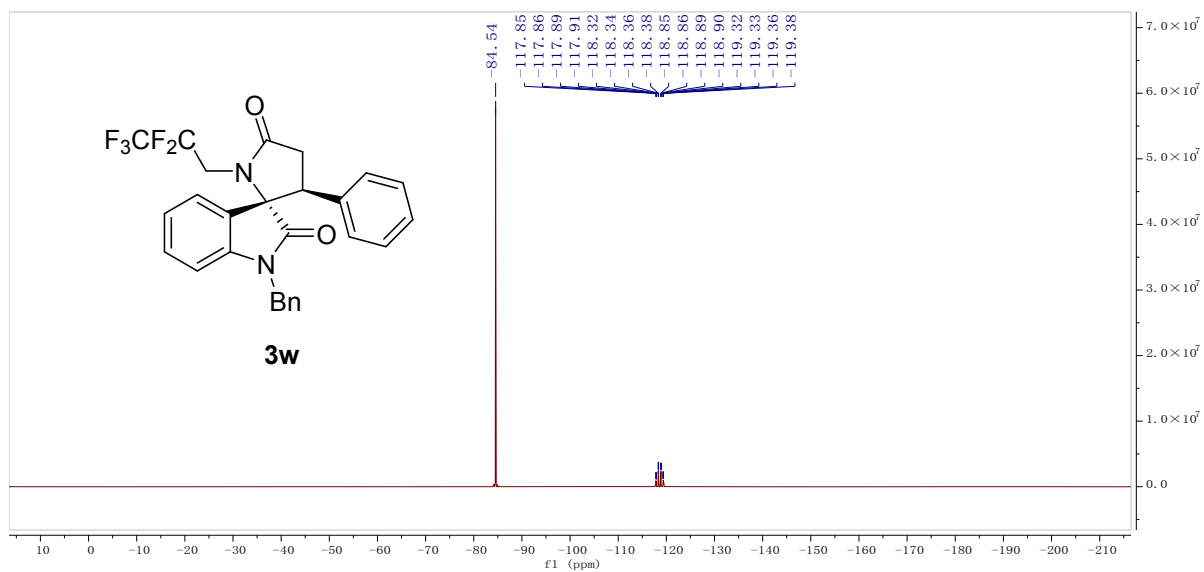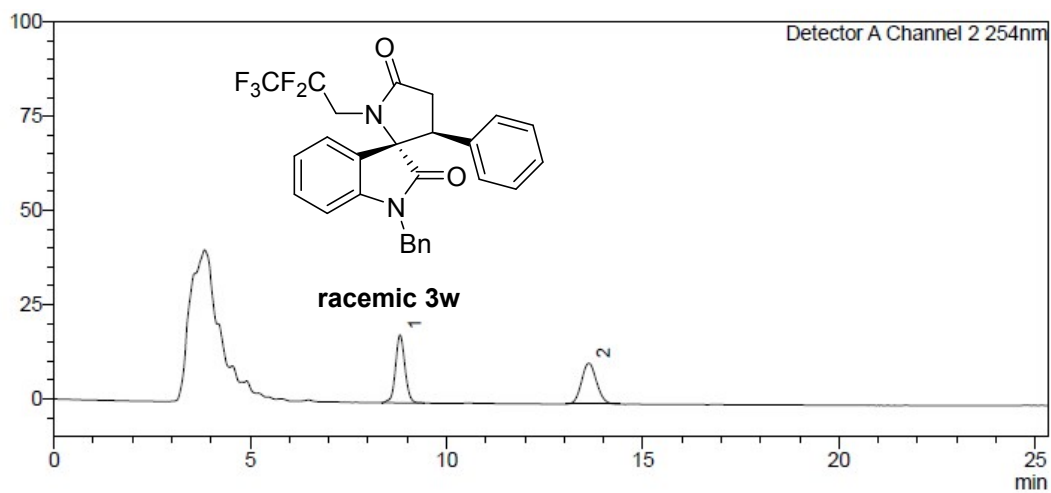

**<Peak Table>**

Detector A Channel 2 254nm

| Peak# | Ret. Time | Area   | Height | Conc.  | Area%   |
|-------|-----------|--------|--------|--------|---------|
| 1     | 8.816     | 299221 | 18005  | 50.733 | 50.733  |
| 2     | 13.625    | 290572 | 10879  | 49.267 | 49.267  |
| Total |           | 589793 | 28884  |        | 100.000 |

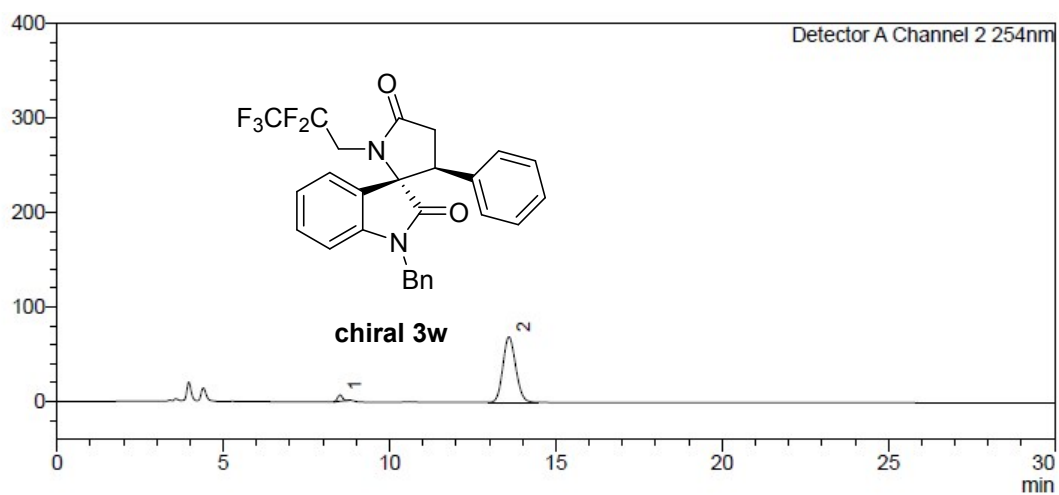

<Peak Table>

Detector A Channel 2 254nm

| Peak# | Ret. Time | Area    | Height | Conc.  | Area%   |
|-------|-----------|---------|--------|--------|---------|
| 1     | 8.510     | 69344   | 6852   | 3.602  | 3.602   |
| 2     | 13.592    | 1855597 | 69272  | 96.398 | 96.398  |
| Total |           | 1924942 | 76124  |        | 100.000 |
